# Supplementary material for: Successive hydrolysis and transfer hydrogenation of 2-chloroquinolines to 3,4-dihydroquinolones
Source: Royal Society of Chemistry journal article supplement (doi:10.1039/d4nj03878a), 2024-01-01

## Successive Hydrolysis and Transfer Hydrogenation of 2- Chloroquinolines to 3,4-Dihydroquinolones

Renshi Luo, <sup>a, b</sup> Sen Wang, <sup>a, b</sup> Yuqiu Liang, <sup>b</sup> Jianhua Liao, <sup>b</sup> Lu Ouyang, <sup>\*, b</sup>

<sup>a</sup> College of Chemistry and Environmental Engineering, Shaoguan University,  
Shaoguan 512005, P. R. China.

<sup>\*b</sup> School of Pharmacy, Gannan Medical University, Ganzhou 341000, Jiangxi  
Province, P. R. China. Corresponding author: oyl3074@163.com

## Supporting Information

### Table of Contents

|                                                                             |            |
|-----------------------------------------------------------------------------|------------|
| <b>A. General Methods .....</b>                                             | <b>S2</b>  |
| <b>B. General Procedure for the Synthesis of 3,4-Dihydroquinolones.....</b> | <b>S2</b>  |
| <b>C. Analytical Data .....</b>                                             | <b>S2</b>  |
| <b>D. References.....</b>                                                   | <b>S11</b> |
| <b>D. NMR Spectra .....</b>                                                 | <b>S14</b> |

## A. General Methods

All the reactions were conducted in oven dried Schlenk tubes. All available reagents and anhydrous solvents were purchased from commercial sources and used as received. Flash chromatography was performed over Silica gel (100–200 mesh) bought from commercial sources.  $^1\text{H}$  and  $^{13}\text{C}$  NMR spectra were collected on a Bruker DRX-400 spectrometer (400 MHz for  $^1\text{H}$ ; 100 MHz for  $^{13}\text{C}$ ) and referenced internally with TMS. High-resolution mass spectra (HRMS) were recorded by a LCMS-IT-TOF mass spectrometer.

## B. General Procedure for the Synthesis of 3,4-Dihydroquinolones

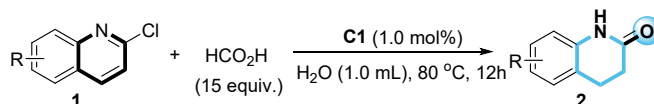

To a 25 mL dried Schlenk tube were added C1 (1 mol%), 1 (0.5 mmol), HCOOH (15.0 mmol, 15.0 equiv.), H<sub>2</sub>O (1.0 mL), then the reaction was stirred at 80 °C for 12h. After the reaction was completed, the mixture was diluted with EtOAc (5.0 mL) carefully quenched with 5 mL of saturated NaHCO<sub>3</sub> solution. The mixture was extracted with EtOAc (10.0 mL×3 times), the organic layers were combined, washed with saturated NaCl and dried with anhydrous MgSO<sub>4</sub>. After removal of the EtOAc under vacuum, the crude product was purified by column chromatography on silica gel with hexanes or petroleum ether/ethyl acetate to give the desired products.

## C. Analytical Data

### 3,4-dihydroquinolin-2(1H)-one (2a)<sup>1</sup>

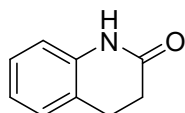

Yield: 70.0 mg (95%), white solid (mp: 163-165 °C).  $^1\text{H}$  NMR (400 MHz, DMSO-*d*<sub>6</sub>)  $\delta$  10.01 (s, 1H), 7.11-7.01 (m, 2H), 6.83 (d,  $J$  = 7.5 Hz, 1H), 6.79 (d,  $J$  = 8.1 Hz, 1H), 2.77 (t,  $J$  = 7.5 Hz, 2H), 2.41-2.30 (m, 2H).  $^{13}\text{C}$  NMR (100 MHz, DMSO-*d*<sub>6</sub>)  $\delta$  170.7, 138.7, 128.2, 127.5, 124.0, 122.4, 115.5, 30.9, 25.2.

### 6-methoxy-3,4-dihydroquinolin-2(1H)-one (2b)<sup>2</sup>

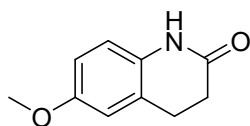

Yield: 85.9 mg (97%), white solid (mp: 140-142 °C). <sup>1</sup>H NMR (400 MHz, DMSO-d<sub>6</sub>) δ 9.97 (s, 1H), 6.80 (d, *J* = 8.6 Hz, 1H), 6.78 (d, *J* = 2.7 Hz, 1H), 6.73 (dd, *J* = 8.5, 2.8 Hz, 1H), 3.70 (s, 3H), 2.84 (t, *J* = 7.5 Hz, 2H), 2.41 (t, 2H). <sup>13</sup>C NMR (100 MHz, DMSO-d<sub>6</sub>) δ 170.3, 154.9, 132.1, 125.3, 116.2, 113.8, 112.7, 55.6, 30.8, 25.6.

### 7-methoxy-3,4-dihydroquinolin-2(1H)-one (2c)<sup>3</sup>

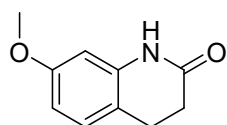

Yield: 70.0 mg (79%), white solid (mp: 147-148 °C). <sup>1</sup>H NMR (400 MHz, DMSO-d<sub>6</sub>) δ 10.0 (s, 1H), 7.1 (d, *J* = 8.2 Hz, 1H), 6.5 (dd, *J* = 8.2, 2.6 Hz, 1H), 6.5 (d, *J* = 2.6 Hz, 1H), 3.7 (s, 3H), 2.8 (t, *J* = 7.5 Hz, 2H), 2.4 (m, 2H). <sup>13</sup>C NMR (100 MHz, DMSO-d<sub>6</sub>) δ 170.8, 159.0, 139.7, 128.9, 116.0, 107.5, 101.6, 55.5, 31.2, 24.5.

### 6-hydroxy-3,4-dihydroquinolin-2(1H)-one (2d)<sup>4</sup>

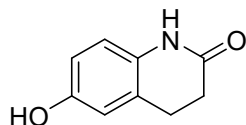

Yield: 75.8 mg (93%), white solid (mp: 236-238 °C). <sup>1</sup>H NMR (400 MHz, DMSO-d<sub>6</sub>) δ 9.85 (s, 1H), 9.07 (s, 1H), 6.68 (d, *J* = 8.4 Hz, 1H), 6.59 (d, *J* = 2.7 Hz, 1H), 6.55 (dd, *J* = 8.4, 2.7 Hz, 1H), 2.83-2.71 (m, 2H), 2.38 (dd, *J* = 8.5, 6.5 Hz, 2H). <sup>13</sup>C NMR (100 MHz, DMSO-d<sub>6</sub>) δ 170.2, 152.8, 130.7, 125.2, 116.3, 115.0, 113.9, 30.9, 25.5.

### 7-hydroxy-3,4-dihydroquinolin-2(1H)-one (2e)<sup>5</sup>

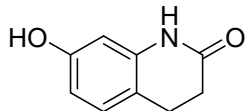

Yield: 70.1 mg (86%), white solid (mp: 235-236 °C). <sup>1</sup>H NMR (400 MHz, DMSO-d<sub>6</sub>) δ 9.95 (s, 1H), 9.29 (s, 1H), 6.91 (d, *J* = 8.0 Hz, 1H), 6.35 (d, *J* = 2.4 Hz, 1H), 6.31 (dd, *J* = 8.0, 2.5 Hz, 1H), 2.72 (t, *J* = 7.5 Hz, 2H), 2.45-2.32 (m, 2H). <sup>13</sup>C NMR (100 MHz, DMSO-d<sub>6</sub>) δ 170.9, 156.9, 139.5, 128.8, 114.2, 109.3, 102.8, 31.4, 24.5.

### 8-hydroxy-3,4-dihydroquinolin-2(1H)-one (2f)<sup>4</sup>

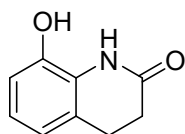

Yield: 65.2 mg (80%), white solid (mp: 178-179 °C). <sup>1</sup>H NMR (400 MHz, DMSO-d<sub>6</sub>) δ 9.70 (s, 1H), 8.83 (s, 1H), 6.75 (t, 1H), 6.70 (dd, *J* = 8.1, 1.6 Hz, 1H), 6.62 (dd, *J* = 7.3, 1.5 Hz, 1H), 2.82 (t, 2H), 2.47-2.37 (m, 2H). <sup>13</sup>C NMR (100 MHz, DMSO-d<sub>6</sub>) δ 170.2, 144.3, 126.2, 125.3, 122.7, 118.7, 114.0, 31.1, 25.5.

**6-methyl-3,4-dihydroquinolin-2(1H)-one (2g)<sup>3</sup>**

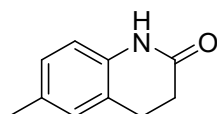

Yield: 67.7 mg (84%), white solid (mp: 129-131 °C). <sup>1</sup>H NMR (400 MHz, DMSO-d<sub>6</sub>) δ 10.02 (s, 1H), 6.95 (s, 1H), 6.93 (d, *J* = 7.7 Hz, 1H), 6.76 (d, *J* = 7.9 Hz, 1H), 2.80 (t, 2H), 2.45-2.36 (m, 2H), 2.21 (s, 3H). <sup>13</sup>C NMR (100 MHz, DMSO-d<sub>6</sub>) δ 170.6, 136.3, 131.2, 128.7, 127.8, 123.8, 115.3, 30.9, 25.3, 20.8.

**8-methyl-3,4-dihydroquinolin-2(1H)-one (2h)<sup>3</sup>**

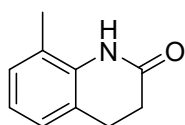

Yield: 71.6 mg (89%), white solid (mp: 129-131 °C). <sup>1</sup>H NMR (400 MHz, DMSO-d<sub>6</sub>) δ 9.46 (s, 1H), 7.00 (t, 2H), 6.84 (t, *J* = 7.5 Hz, 1H), 2.84 (t, 2H), 2.46-2.40 (m, 2H), 2.22 (s, 3H). <sup>13</sup>C NMR (100 MHz, DMSO-d<sub>6</sub>) δ 171.4, 136.8, 129.2, 125.8, 124.8, 124.0, 122.4, 31.2, 25.7, 17.6.

**8-fluoro-3,4-dihydroquinolin-2(1H)-one (2i)<sup>6</sup>**

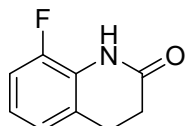

Yield: 61.9 mg (75%), white solid (mp: 142-143 °C). <sup>1</sup>H NMR (400 MHz, DMSO-d<sub>6</sub>) δ 10.10 (s, 1H), 7.06 (ddd, *J* = 10.7, 8.1, 1.4 Hz, 1H), 7.02 (d, *J* = 6.7 Hz, 1H), 6.96-6.89 (m, 1H), 2.92 (t, 2H), 2.51-2.45 (m, 2H). <sup>13</sup>C NMR (100 MHz, DMSO-d<sub>6</sub>) δ 170.4, 149.9 (d, *J* = 242 Hz), 127.3 (d, *J* = 2 Hz), 126.6 (d, *J* = 13 Hz), 123.8 (d, *J* = 3 Hz), 122.7 (d, *J* = 7 Hz), 114.1 (d, *J* = 18 Hz), 30.8, 25.3 (d, *J* = 8 Hz). <sup>19</sup>F NMR (377 MHz, DMSO-d<sub>6</sub>) δ -131.5.

**6-fluoro-3,4-dihydroquinolin-2(1H)-one (2j)**<sup>7</sup>

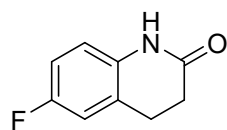

Yield: 58.6 mg (71%), white solid (mp: 178-179 °C). <sup>1</sup>H NMR (400 MHz, DMSO-d<sub>6</sub>) δ 10.13 (s, 1H), 7.02 (dd, *J* = 9.1, 2.9 Hz, 1H), 6.95 (td, *J* = 8.7, 2.9 Hz, 1H), 6.86 (dd, *J* = 8.7, 5.1 Hz, 1H), 2.85 (t, *J* = 7.6 Hz, 2H), 2.41 (dd, *J* = 8.3, 6.8 Hz, 2H). <sup>13</sup>C NMR (100 MHz, DMSO-d<sub>6</sub>) δ 170.6, 157.8 (d, *J* = 235 Hz), 135.1 (d, *J* = 2 Hz), 126.2 (d, *J* = 8 Hz), 116.5 (d, *J* = 2 Hz), 114.9 (d, *J* = 23 Hz), 113.9 (d, *J* = 23 Hz), 30.3, 25.2. <sup>19</sup>F NMR (377 MHz, DMSO-d<sub>6</sub>) δ -121.8.

**6-chloro-3,4-dihydroquinolin-2(1H)-one (2k)**<sup>8</sup>

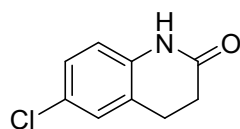

Yield: 73.3 mg (81%), white solid (mp: 162-164 °C). <sup>1</sup>H NMR (400 MHz, DMSO-d<sub>6</sub>) δ 10.23 (s, 1H), 7.24 (d, *J* = 2.4 Hz, 1H), 7.19 (dd, *J* = 8.4, 2.5 Hz, 1H), 6.87 (d, *J* = 8.4 Hz, 1H), 2.88 (t, *J* = 7.6 Hz, 2H), 2.49-2.42 (m, 2H). <sup>13</sup>C NMR (100 MHz, DMSO-d<sub>6</sub>) δ 170.6, 137.7, 127.9, 127.3, 126.2, 126.0, 116.9, 30.4, 25.0.

**8-chloro-3,4-dihydroquinolin-2(1H)-one (2l)**<sup>9</sup>

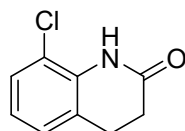

Yield: 57.0 mg (63%), white solid (mp: 105-107 °C). <sup>1</sup>H NMR (400 MHz, DMSO-d<sub>6</sub>) δ 9.52 (s, 1H), 7.28 (dd, *J* = 8.1, 1.4 Hz, 1H), 7.18 (d, *J* = 7.5 Hz, 1H), 7.01-6.90 (m, 1H), 2.98-2.87 (m, 2H), 2.54-2.46 (m, 2H). <sup>13</sup>C NMR (100 MHz, DMSO-d<sub>6</sub>) δ 170.8, 135.3, 128.0, 127.2, 127.1, 123.5, 119.5, 30.8, 25.7.

**5-chloro-3,4-dihydroquinolin-2(1H)-one (2m)**<sup>10</sup>

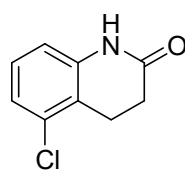

Yield: 70.0 mg (77%), white solid (mp: 108-110 °C). <sup>1</sup>H NMR (400 MHz, DMSO-d<sub>6</sub>) δ 10.31 (s, 1H), 7.15 (t, *J* = 8.0 Hz, 1H), 7.01 (d, *J* = 7.0 Hz, 1H), 6.87 (d, *J* = 7.9 Hz,

1H), 2.95 (t,  $J = 7.7$  Hz, 2H), 2.51-2.44 (m, 2H).  $^{13}\text{C}$  NMR (100 MHz, DMSO- $d_6$ )  $\delta$  170.3, 140.4, 132.6, 128.7, 122.9, 121.7, 114.5, 30.0, 22.8.

**8-bromo-3,4-dihydroquinolin-2(1H)-one (2n)<sup>7</sup>**

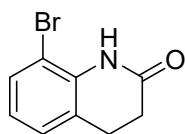

Yield: 50.6 mg (45%), white solid (mp: 77-79 °C).  $^1\text{H}$  NMR (400 MHz, DMSO- $d_6$ )  $\delta$  9.13 (s, 1H), 7.44 (d,  $J = 8.1$  Hz, 1H), 7.22 (d,  $J = 7.0$  Hz, 1H), 6.90 (t,  $J = 7.8$  Hz, 1H), 2.98-2.89 (m, 2H), 2.55-2.50 (m, 2H).  $^{13}\text{C}$  NMR (100 MHz, DMSO- $d_6$ )  $\delta$  170.9, 136.4, 131.2, 127.7, 127.6, 124.1, 109.5, 30.9, 25.9.

**7-bromo-3,4-dihydroquinolin-2(1H)-one (2o)<sup>3</sup>**

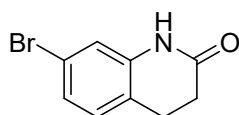

Yield: 86.6 mg (77%), white solid (mp: 184-186 °C).  $^1\text{H}$  NMR (400 MHz, DMSO- $d_6$ )  $\delta$  10.22 (s, 1H), 7.12 (d,  $J = 8.0$  Hz, 1H), 7.07 (dd,  $J = 8.0, 2.0$  Hz, 1H), 7.04 (d,  $J = 2.0$  Hz, 1H), 2.89-2.80 (m, 2H), 2.49-2.42 (m, 2H).  $^{13}\text{C}$  NMR (100 MHz, DMSO- $d_6$ )  $\delta$  170.6, 140.5, 130.1, 124.8, 123.4, 119.8, 117.7, 30.5, 24.7.

**6-bromo-3,4-dihydroquinolin-2(1H)-one (2p)<sup>8</sup>**

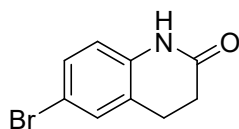

Yield: 72.0 mg (64%), white solid (mp: 156-158 °C).  $^1\text{H}$  NMR (400 MHz, DMSO- $d_6$ )  $\delta$  10.19 (s, 1H), 7.35 (s, 1H), 7.29 (dd,  $J = 8.4, 2.3$  Hz, 1H), 6.80 (d,  $J = 8.4$  Hz, 1H), 2.86 (t,  $J = 7.5$  Hz, 2H), 2.48-2.36 (m, 2H).  $^{13}\text{C}$  NMR (100 MHz, DMSO- $d_6$ )  $\delta$  170.5, 138.2, 130.7, 130.1, 126.7, 117.3, 113.8, 30.4, 24.9.

**6-iodo-3,4-dihydroquinolin-2(1H)-one (2q)<sup>11</sup>**

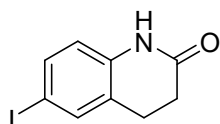

Yield: 59.0 mg (43%), white solid (mp: 172-173 °C).  $^1\text{H}$  NMR (400 MHz, DMSO- $d_6$ )  $\delta$  10.21 (s, 1H), 7.50 (s, 1H), 7.44 (dd,  $J = 8.3, 2.1$  Hz, 1H), 6.70 (d,  $J = 8.5$  Hz, 1H),

2.84 (t,  $J = 7.5$  Hz, 2H), 2.47-2.33 (m, 2H).  $^{13}\text{C}$  NMR (100 MHz, DMSO- $d_6$ )  $\delta$  170.5, 138.7, 136.4, 136.0, 127.0, 117.8, 85.4, 30.5, 24.8.

**2-oxo-1,2,3,4-tetrahydroquinoline-6-carbonitrile (2r)**<sup>12</sup>

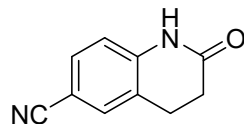

Yield: 26.7 mg (31%), white solid (mp:  $>280$  °C).  $^1\text{H}$  NMR (400 MHz, DMSO- $d_6$ )  $\delta$  10.54 (s, 1H), 7.66 (s, 1H), 7.61 (dd,  $J = 8.2, 1.9$  Hz, 1H), 6.97 (d,  $J = 8.2$  Hz, 1H), 2.93 (t,  $J = 7.6$  Hz, 2H), 2.52-2.46 (m, 2H).  $^{13}\text{C}$  NMR (100 MHz, DMSO- $d_6$ )  $\delta$  170.8, 143.1, 132.2, 132.0, 125.2, 119.7, 116.0, 104.1, 30.2, 24.6.

**5-nitro-3,4-dihydroquinolin-2(1H)-one (2s)**<sup>13</sup>

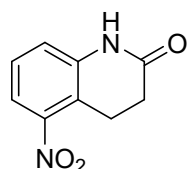

Yield: 63.4 mg (66%), light yellow solid (mp: 210-212 °C).  $^1\text{H}$  NMR (400 MHz, DMSO- $d_6$ )  $\delta$  10.52 (s, 1H), 7.55 (dd,  $J = 8.2, 1.2$  Hz, 1H), 7.40 (t,  $J = 8.1$  Hz, 1H), 7.19 (d,  $J = 8.0$  Hz, 1H), 3.10 (t,  $J = 7.6$  Hz, 2H), 2.51-2.44 (m, 2H).  $^{13}\text{C}$  NMR (100 MHz, DMSO- $d_6$ )  $\delta$  170.3, 149.2, 140.8, 128.5, 120.2, 119.1, 118.0, 29.6, 22.0.

**8-nitro-3,4-dihydroquinolin-2(1H)-one (2t)**<sup>14</sup>

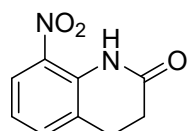

Yield: 49.0 mg (51%), yellow solid (mp: 148-150 °C).  $^1\text{H}$  NMR (400 MHz, DMSO- $d_6$ )  $\delta$  9.84 (s, 1H), 7.99 (dd,  $J = 8.5, 1.4$  Hz, 1H), 7.65 (d,  $J = 7.5$  Hz, 1H), 7.15 (dd,  $J = 8.5, 7.3$  Hz, 1H), 3.05 (t, 2H), 2.64-2.57 (m, 2H).  $^{13}\text{C}$  NMR (100 MHz, DMSO- $d_6$ )  $\delta$  170.6, 134.8, 134.7, 134.1, 127.9, 124.1, 122.4, 29.8, 25.3.

**4-methyl-3,4-dihydroquinolin-2(1H)-one (2u)**<sup>15</sup>

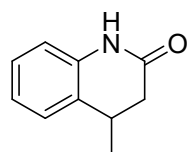

Yield: 32.2 mg (40%), white solid (mp: 94-96 °C).  $^1\text{H}$  NMR (400 MHz, DMSO- $d_6$ )  $\delta$  10.10 (s, 1H), 7.18 (d,  $J = 7.5$  Hz, 1H), 7.13 (t,  $J = 7.6$  Hz, 1H), 6.93 (t,  $J = 7.5$  Hz, 1H),

6.86 (d,  $J = 7.9$  Hz, 1H), 3.08-2.97 (m, 1H), 2.56 (dd,  $J = 16.0, 5.8$  Hz, 1H), 2.22 (dd,  $J = 16.0, 6.9$  Hz, 1H), 1.16 (d,  $J = 7.0$  Hz, 3H).  $^{13}\text{C}$  NMR (100 MHz, DMSO- $d_6$ )  $\delta$  170.3, 137.7, 128.9, 127.6, 126.9, 122.8, 115.7, 38.4, 30.5, 20.1.

**3-ethyl-3,4-dihydroquinolin-2(1H)-one (2v)<sup>16</sup>**

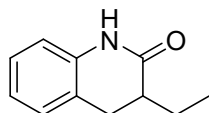

Yield: 71.0 mg (81%), light yellow oil.  $^1\text{H}$  NMR (400 MHz, Chloroform- $d$ )  $\delta$  9.41 (s, 1H), 7.15 (t,  $J = 7.9$  Hz, 2H), 6.97 (t,  $J = 7.4$  Hz, 1H), 6.85 (d,  $J = 7.7$  Hz, 1H), 3.04 (dd,  $J = 15.8, 5.9$  Hz, 1H), 2.76 (dd,  $J = 15.8, 8.5$  Hz, 1H), 2.54-2.44 (m, 1H), 1.95-1.83 (m, 1H), 1.57-1.45 (m, 1H), 1.03 (t,  $J = 7.5$  Hz, 3H).  $^{13}\text{C}$  NMR (100 MHz, Chloroform- $d$ )  $\delta$  174.8, 137.1, 128.2, 127.4, 123.2, 122.9, 115.3, 41.5, 30.1, 22.7, 11.6.

**3-methyl-3,4-dihydroquinolin-2(1H)-one (2w)<sup>3</sup>**

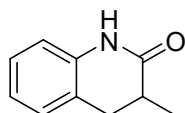

Yield: 63.0 mg (78%), white solid (mp: 131-132 °C).  $^1\text{H}$  NMR (400 MHz, DMSO- $d_6$ )  $\delta$  10.08 (s, 1H), 7.22-7.07 (m, 2H), 6.97-6.79 (m, 2H), 2.92 (dd,  $J = 15.5, 5.9$  Hz, 1H), 2.63 (dd,  $J = 15.5, 11.6$  Hz, 1H), 2.55-2.50 (m, 1H), 1.12 (d,  $J = 6.8$  Hz, 3H).  $^{13}\text{C}$  NMR (100 MHz, DMSO- $d_6$ )  $\delta$  173.3, 138.6, 128.2, 127.5, 123.9, 122.3, 115.2, 34.6, 33.2, 15.7.

**2-oxo-1,2,3,4-tetrahydroquinoline-3-carbonitrile (2x)<sup>17</sup>**

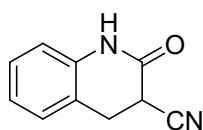

Yield: 52.5 mg (61%), white solid (mp: 227-228 °C).  $^1\text{H}$  NMR (400 MHz, DMSO- $d_6$ )  $\delta$  10.70 (s, 1H), 7.22 (dd,  $J = 13.0, 7.1$  Hz, 2H), 6.99 (t,  $J = 7.5$  Hz, 1H), 6.90 (d,  $J = 7.9$  Hz, 1H), 4.40 (dd,  $J = 11.6, 7.2$  Hz, 1H), 3.36-3.22 (m, 2H).  $^{13}\text{C}$  NMR (100 MHz, DMSO- $d_6$ )  $\delta$  163.4, 137.5, 128.4, 123.2, 121.4, 118.3, 116.0, 34.0, 29.1.

**1,4-dihydroisoquinolin-3(2H)-one (2y)<sup>18</sup>**

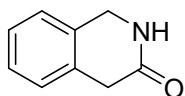



Yield: 58.8 mg (80%), light yellow solid (mp: 150-152 °C). <sup>1</sup>H NMR (400 MHz, DMSO-d<sub>6</sub>) δ 8.16 (s, 1H), 7.41-7.37 (m, 1H), 7.37-7.28 (m, 3H), 4.46 (s, 2H), 3.56 (s, 2H). <sup>13</sup>C NMR (100 MHz, DMSO-d<sub>6</sub>) δ 171.1, 133.3, 133.1, 127.7, 127.4, 126.7, 125.8, 44.6, 37.3.

**9-chloro-3,4-dihydro-1,10-phenanthrolin-2(1H)-one (2z)**

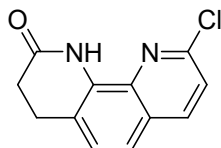

Yield: 104.4 mg (90%), white solid (mp: 168-169 °C). <sup>1</sup>H NMR (400 MHz, DMSO-d<sub>6</sub>) δ 9.34 (s, 1H), 8.41 (d, *J* = 8.5 Hz, 1H), 7.60 (dd, *J* = 13.0, 8.4 Hz, 2H), 7.52 (d, *J* = 8.3 Hz, 1H), 3.12 (t, *J* = 7.7 Hz, 2H), 2.68-2.60 (m, 2H). <sup>13</sup>C NMR (100 MHz, DMSO-d<sub>6</sub>) δ 170.0, 149.4, 140.5, 135.9, 132.9, 128.0, 126.1, 124.0, 122.8, 121.1, 30.6, 25.4. HRMS-ESI (m/z): [M+H]<sup>+</sup> Calcd for C<sub>12</sub>H<sub>10</sub>ClN<sub>2</sub>O 233.0476; Found 233.0465.

**3,4-dihydroquinazolin-2(1H)-one (2ab)<sup>19</sup>**

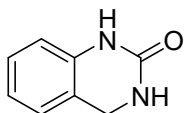

Yield: 65.2 mg (88%), white solid (mp: 182-184 °C). <sup>1</sup>H NMR (400 MHz, DMSO-d<sub>6</sub>) δ 9.13 (s, 1H), 7.12 (t, *J* = 8.4 Hz, 1H), 7.08 (d, *J* = 7.4 Hz, 1H), 6.91 (s, 1H), 6.86 (t, *J* = 7.5 Hz, 1H), 6.80 (d, *J* = 8.2 Hz, 1H), 4.34 (s, 2H). <sup>13</sup>C NMR (100 MHz, DMSO-d<sub>6</sub>) δ 155.2, 138.5, 128.1, 126.2, 121.5, 118.6, 114.0, 43.0.

**7-fluoro-3,4-dihydroquinazolin-2(1H)-one (2ac)**

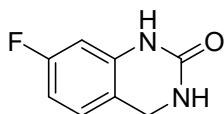

Yield: 36.0 mg (43%), white solid (mp: 274-275 °C). <sup>1</sup>H NMR (400 MHz, DMSO-d<sub>6</sub>) δ 9.19 (s, 1H), 7.15-7.07 (m, 1H), 6.96 (s, 1H), 6.68 (td, *J* = 8.7, 2.6 Hz, 1H), 6.58 (dd, *J* = 10.3, 2.6 Hz, 1H), 4.31 (s, 2H). <sup>13</sup>C NMR (100 MHz, DMSO-d<sub>6</sub>) δ 163.2.1 (d, *J* = 239 Hz), 154.7, 140.2 (d, *J* = 11 Hz), 127.8 (d, *J* = 10 Hz), 114.7 (d, *J* = 3 Hz), 107.8 (d, *J* = 22 Hz), 101.8 (d, *J* = 26 Hz), 42.4. <sup>19</sup>F NMR (377 MHz, DMSO-d<sub>6</sub>) δ -115.0. HRMS-ESI (m/z): [M+H]<sup>+</sup> Calcd for C<sub>8</sub>H<sub>8</sub>FN<sub>2</sub>O 167.0615; Found 167.0605.

**6-bromo-3,4-dihydroquinazolin-2(1H)-one (2ad)<sup>20</sup>**

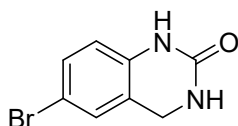

Yield: 96.1 mg (85%), white solid (mp: 247-248 °C). <sup>1</sup>H NMR (400 MHz, DMSO-d<sub>6</sub>) δ 9.20 (s, 1H), 7.35-7.25 (m, 2H), 6.94 (s, 1H), 6.74 (d, *J* = 8.3 Hz, 1H), 4.33 (s, 2H). <sup>13</sup>C NMR (100 MHz, DMSO-d<sub>6</sub>) δ 154.8, 138.0, 130.7, 128.8, 121.2, 115.9, 112.7, 42.5.

**4-phenyl-3,4-dihydroquinazolin-2(1H)-one (2ae)<sup>21</sup>**

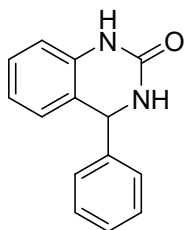

Yield: 67.2 mg (60%), white solid (mp: 194-195 °C). <sup>1</sup>H NMR (400 MHz, DMSO-d<sub>6</sub>) δ 9.30 (s, 1H), 7.48 (s, 1H), 7.32 (d, *J* = 5.7 Hz, 4H), 7.27-7.20 (m, 1H), 7.15-7.08 (m, 1H), 7.05 (d, *J* = 7.5 Hz, 1H), 6.83 (t, *J* = 7.9 Hz, 2H), 5.54 (d, *J* = 2.7 Hz, 1H). <sup>13</sup>C NMR (100 MHz, DMSO-d<sub>6</sub>) δ 154.3, 145.5, 137.4, 129.0, 128.3, 127.8, 127.2, 126.7, 122.1, 121.6, 114.4, 57.2.

**3-oxo-3,4-dihydroquinoxaline-1(2H)-carbaldehyde (2af)<sup>22</sup>**

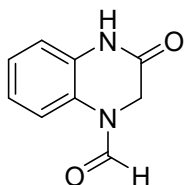

Yield: 80.1 mg (91%), yellow solid (mp: 213-215 °C). <sup>1</sup>H NMR (400 MHz, DMSO-d<sub>6</sub>) δ 10.79 (s, 1H), 8.70 (s, 1H), 7.46 (d, *J* = 7.9 Hz, 1H), 7.19 (td, *J* = 7.7, 1.3 Hz, 1H), 7.06 (dd, *J* = 7.7, 1.5 Hz, 1H), 7.02 (dd, *J* = 7.9, 1.4 Hz, 1H), 4.32 (s, 2H). <sup>13</sup>C NMR (100 MHz, DMSO-d<sub>6</sub>) δ 165.8, 161.6, 130.8, 126.4, 125.8, 123.4, 118.7, 116.7, 43.2.

**6-(pyridin-3-yl)-3,4-dihydroquinolin-2(1H)-one (3p)<sup>3</sup>**

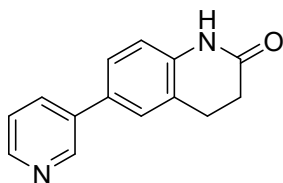

Yield: 86.0 mg (77 %), white solid (mp:185-187 °C). <sup>1</sup>H NMR (400 MHz, DMSO-d<sub>6</sub>) δ 10.25 (s, 1H), 8.86 (d, *J* = 2.5 Hz, 1H), 8.52 (dd, *J* = 4.8, 1.6 Hz, 1H), 8.07-7.98 (m, 1H), 7.58 (d, *J* = 2.1 Hz, 1H), 7.53 (dd, *J* = 8.2, 2.2 Hz, 1H), 7.45 (dd, *J* = 8.0, 4.8 Hz, 1H), 6.98 (d, *J* = 8.1 Hz, 1H), 2.96 (t, *J* = 7.6 Hz, 2H), 2.49 (d, *J* = 6.9 Hz, 2H). <sup>13</sup>C NMR (100 MHz, DMSO-d<sub>6</sub>) δ 170.8, 148.3, 147.6, 138.8, 135.7, 134.0, 131.1, 126.7, 126.1, 124.8, 124.3, 116.1, 30.8, 25.3.

#### D. References

1. Kang, W.-J.; Pan, Y.; Ding, A.; Guo, H. Organophotocatalytic Alkene Reduction Using Water as a Hydrogen Donor. *Org. Lett.* **2023**, *25*, 7633-7638.
2. Li, B.; Park, Y.; Chang, S. Regiodivergent access to five- and six-membered benzo-fused lactams: Ru-catalyzed olefin hydrocarbamoylation. *J. Am. Chem. Soc.* **2014**, *136*, 1125-1131.
3. Tan, Y.-F.; Long, C.-J.; Guan, Z.; He, Y.-H. Selective electrochemical oxidation of tetrahydroquinolines to 3, 4-dihydroquinolones. *Green Chem.* **2022**, *24*, 4581-4587.
4. Li, Y.; Wong, L. L. Multi-Functional Oxidase Activity of CYP102A1 (P450BM3) in the Oxidation of Quinolines and Tetrahydroquinolines. *Angew. Chem.* **2019**, *131*, 9651-9655.
5. Kang, W. J.; Li, B.; Duan, M.; Pan, G.; Sun, W.; Ding, A.; Zhang, Y.; Houk, K.; Guo, H. Discovery of a Thioxanthone–TfOH Complex as a Photoredox Catalyst for Hydrogenation of Alkenes Using p-Xylene as both Electron and Hydrogen Sources. *Angew. Chem. Int. Ed.* **2022**, *61*, e202211562.
6. Hu, Q.; Yin, L.; Ali, A.; Cooke, A. J.; Bennett, J.; Ratcliffe, P.; Lo, M. M.-C.; Metzger, E.; Hoyt, S.; Hartmann, R. W. Novel pyridyl substituted 4, 5-dihydro-[1, 2, 4] triazolo [4, 3-a] quinolines as potent and selective aldosterone synthase inhibitors with improved in vitro metabolic stability. *J. Med. Chem.* **2015**, *58*, 2530-2537.
7. Sun, W.; Ling, C.-H.; Au, C.-M.; Yu, W.-Y. Ruthenium-Catalyzed Intramolecular Arene C(sp<sup>2</sup>)–H Amidation for Synthesis of 3, 4-Dihydroquinolin-2 (1H)-ones. *Org. Lett.* **2021**, *23*, 3310-3314.
8. Kang, W.-J.; Pan, Y.; Ding, A.; Guo, H. Organophotocatalytic Alkene Reduction

- Using Water as a Hydrogen Donor. *Org. Lett.* **2023**, *25* (42), 7633-7638.
9. Yang, L.; Shi, L.; Xing, Q.; Huang, K.-W.; Xia, C.; Li, F., Enabling CO insertion into o-nitrostyrenes beyond reduction for selective access to indolin-2-one and dihydroquinolin-2-one derivatives. *ACS Catal.* **2018**, *8*, 10340-10348.
10. Tian, X.; Li, X.; Duan, S.; Du, Y.; Liu, T.; Fang, Y.; Chen, W.; Zhang, H.; Li, M.; Yang, X., Room Temperature Benzofused Lactam Synthesis Enabled by Cobalt (III)-Catalyzed C (sp<sup>2</sup>)-H Amidation. *Adv. Synth. Catal.* **2021**, *363*, 1050-1058.
11. Cui, B.; Yan, B.; Wang, K.; Li, L.; Chen, S.; Zhang, Z. Discovery of a New Class of Uracil Derivatives as Potential Mixed Lineage Kinase Domain-like Protein (MLKL) Inhibitors. *J. Med. Chem.* **2022**, *65*, 12747-12780.
12. Keum, H.; Jung, H.; Jeong, J.; Kim, D.; Chang, S. Visible-Light Induced C (sp<sup>2</sup>)-H Amidation with an Aryl-Alkyl  $\sigma$ -Bond Relocation via Redox-Neutral Radical-Polar Crossover. *Angew. Chem. Int. Ed.* **2021**, *60*, 25235-25240.
13. Paloque, L.; Verhaeghe, P.; Casanova, M.; Castera-Ducros, C.; Dumètre, A.; Mbatchi, L.; Hutter, S.; Kraiem-M'Rabet, M.; Laget, M.; Remusat, V. Discovery of a new antileishmanial hit in 8-nitroquinoline series. *Eur. J. Med. Chem.* **2012**, *54*, 75-86.
14. Moodie, R. B.; Thomas, P. N. Schofield, K., Electrophilic aromatic substitution. Part 18. Nitration of acetanilide and some analogues: A reconsideration. *J. Chem. Soc., Perkin Trans. 2* **1977**, *13*, 1693-1705.
15. Ru, T.; Ning, Y.; Liu, D.; Tao, Y.; Wang, J.; Chen, F.-E. Hydrogen-free palladium-catalyzed intramolecular anti-Markovnikov hydroaminocarbonylation of 2-(1-methylvinyl) anilines. *Chem. Commun.* **2023**, *59*, 3755-3758.
16. Cai, X.-P.; Han, B.-H.; Cen, F.-T.; Qu, J.-P.; Kang, Y.-B., Endo/Exo-Controllable Photocyclization by EnT-SET-Switch. *Org. Lett.* **2023**, *25*, 2863-2867.
17. Nammalwar, B.; Bunce, R. A.; Hiett, J. T. Ring Size and Substitution Effects in the Tandem Reduction-Lactamization of ortho-Substituted Nitroarenes. *Org. Prep. Proced. Int.* **2015**, *47*, 338-355.
18. Kim, H.; Kim, C.; Yun, S. Utilization of Borane-Catalyzed Hydrosilylation as a Dearomatizing Tool: Six-Membered Cyclic Amidine Synthesis from Isoquinolines and

Pyridines. *Synthesis* **2020**, *53*, 754-764.

19. Xu, M.; Jupp, A. R.; Ong, M. S.; Burton, K. I.; Chitnis, S. S.; Stephan, D. W. Synthesis of urea derivatives from CO<sub>2</sub> and silylamines. *Angewandte Chemie* **2019**, *131*, 5763-5767.

20. Grombein, C. M.; Hu, Q.; Rau, S.; Zimmer, C.; Hartmann, R. W. Heteroatom insertion into 3, 4-dihydro-1H-quinolin-2-ones leads to potent and selective inhibitors of human and rat aldosterone synthase. *Eur.J. Med. Chem.* **2015**, *90*, 788-796.

21. Bergman, J.; Brynolf, A.; Elman, B.; Vuorinen, E. Synthesis of quinazolines. *Tetrahedron* **1986**, *42*, 3697-3706.

22. Harsányi, K.; Gönczi, C.; Horváth, G.; Korbonits, D. Amidoxime, I Herstellung und Acylierung von 2-Oximino-1.2. 3.4-tetrahydro-chinoxalin, einem semicyclischen Amidoxim. *Chem. Ber.* **1972**, *105*, 805-812.

## E. NMR Spectra

### <sup>1</sup>H NMR spectrum of 3,4-dihydroquinolin-2(1H)-one (2a)

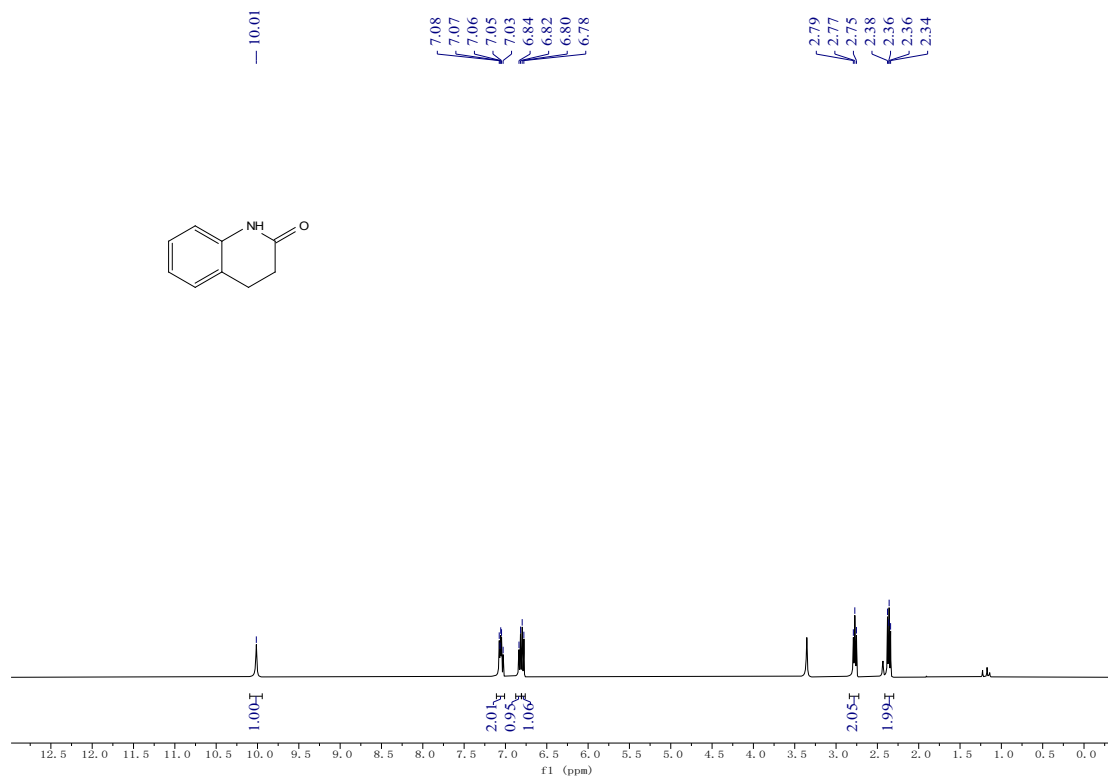

### <sup>13</sup>C NMR spectrum of 3,4-dihydroquinolin-2(1H)-one (2a)

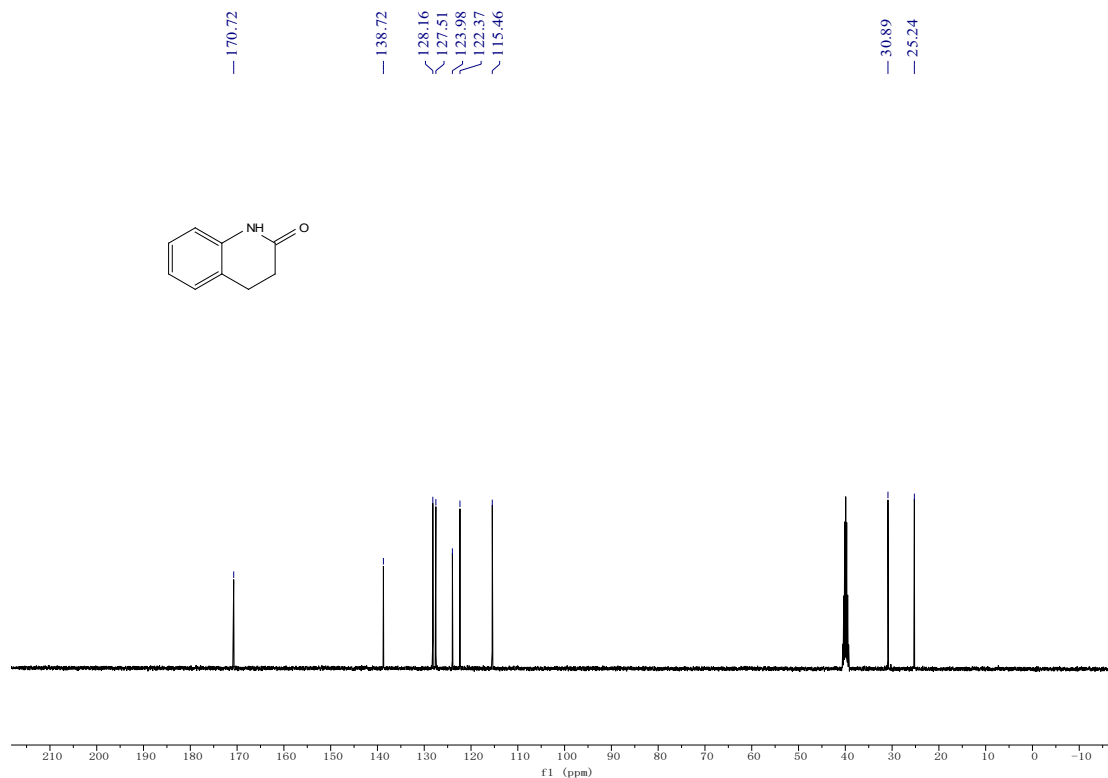

### <sup>1</sup>H NMR spectrum of 6-methoxy-3,4-dihydroquinolin-2(1H)-one (2b)

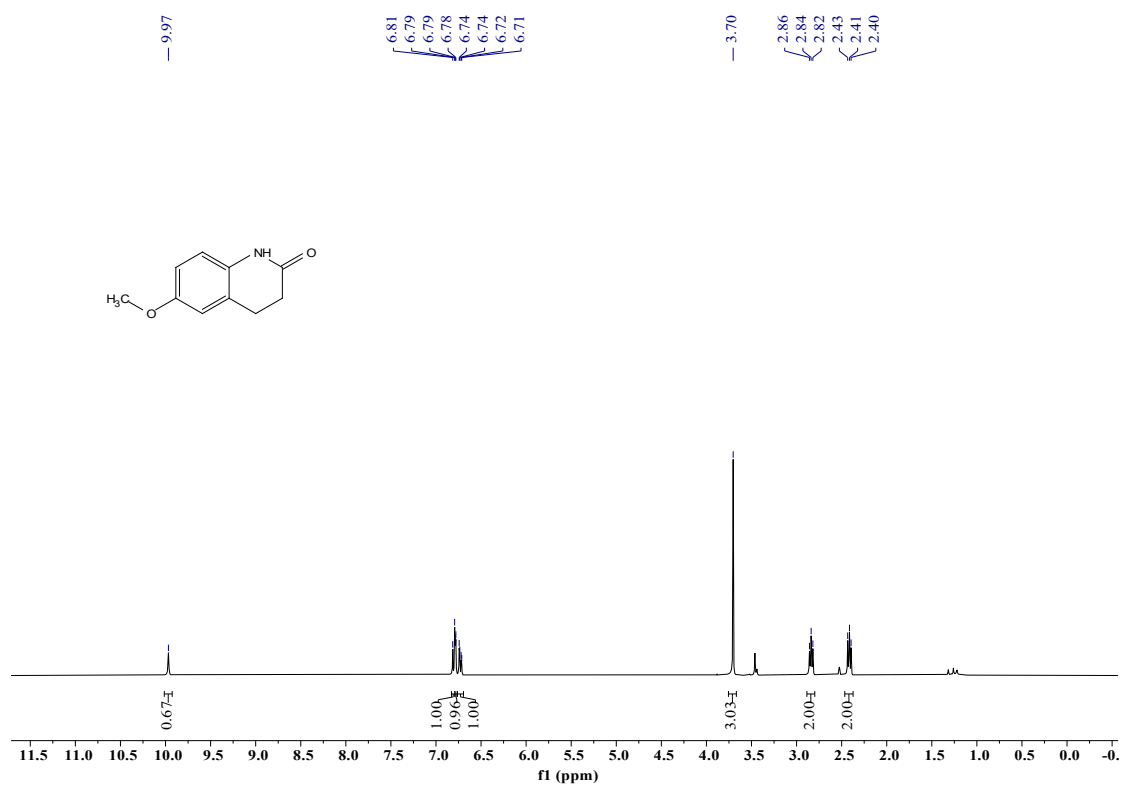

### <sup>13</sup>C NMR spectrum of 6-methoxy-3,4-dihydroquinolin-2(1H)-one (2b)

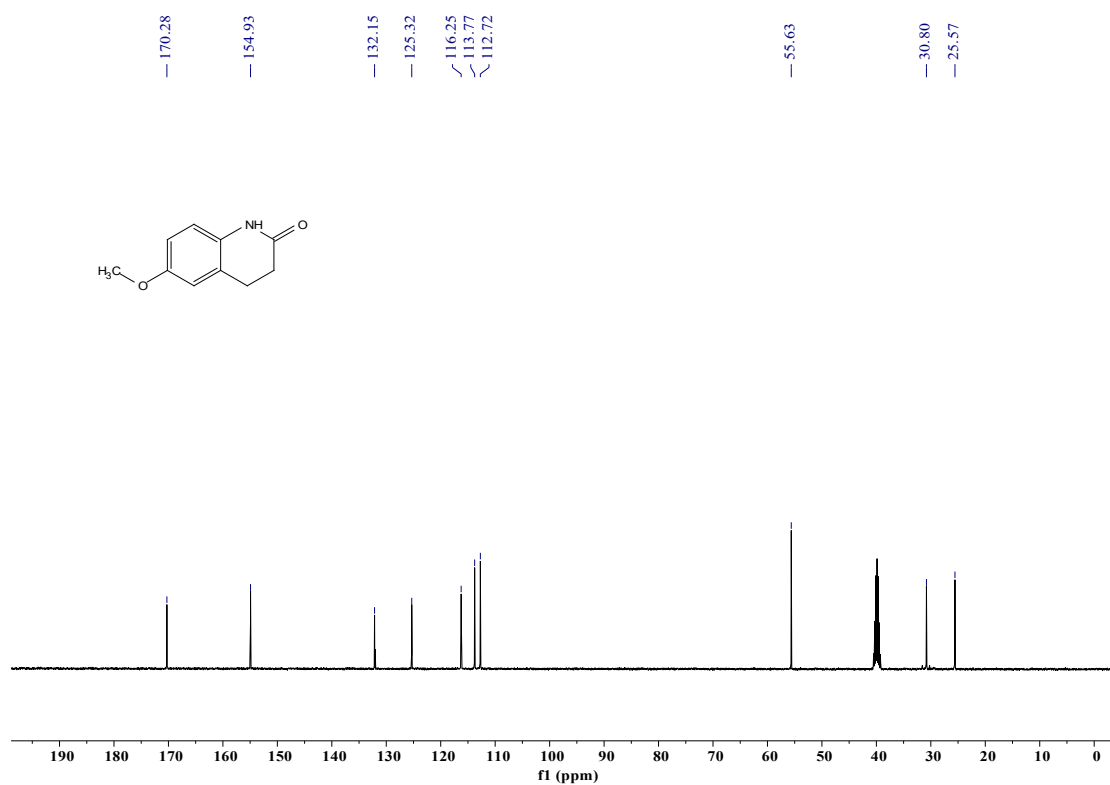

### <sup>1</sup>H NMR spectrum of 7-methoxy-3,4-dihydroquinolin-2(1H)-one (2c)

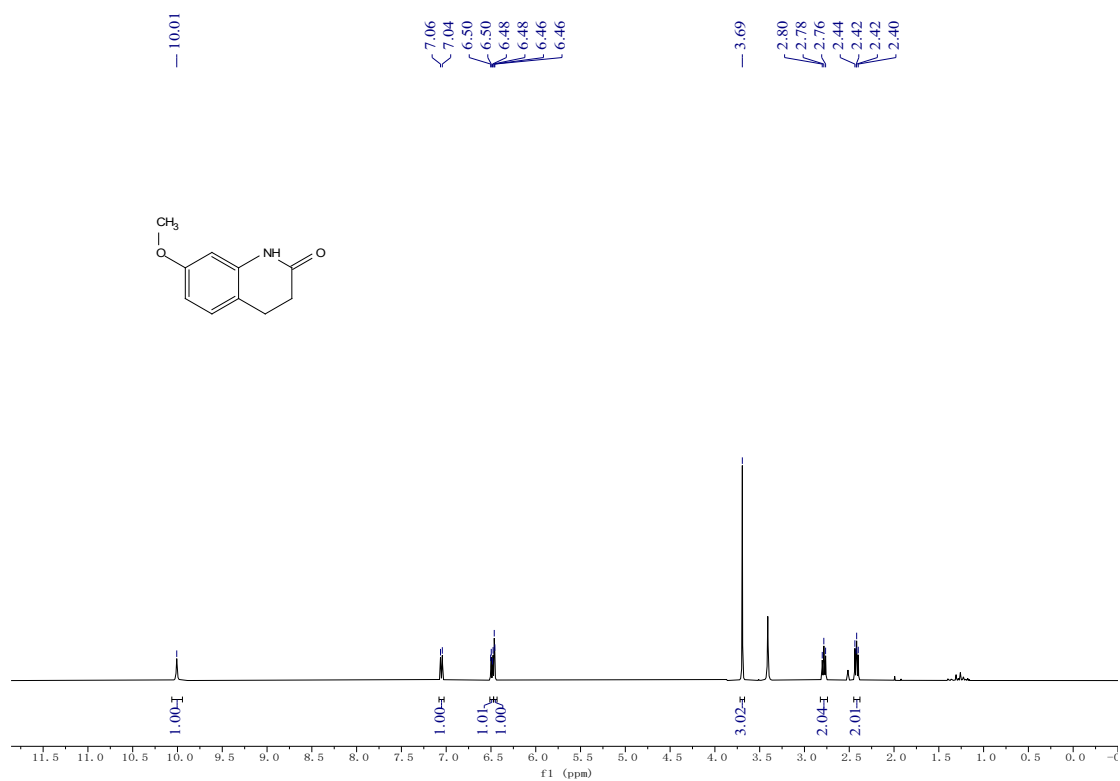

### <sup>13</sup>C NMR spectrum of 7-methoxy-3,4-dihydroquinolin-2(1H)-one (2c)

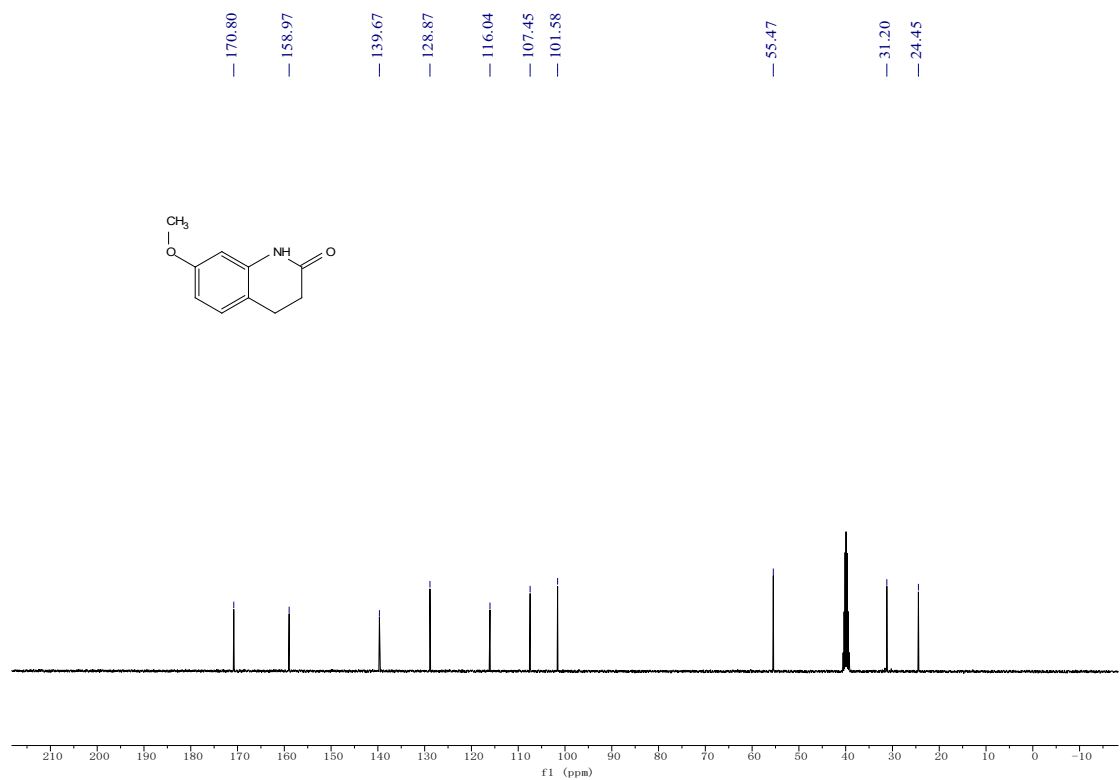



### <sup>1</sup>H NMR spectrum of 6-hydroxy-3,4-dihydroquinolin-2(1H)-one (2d)

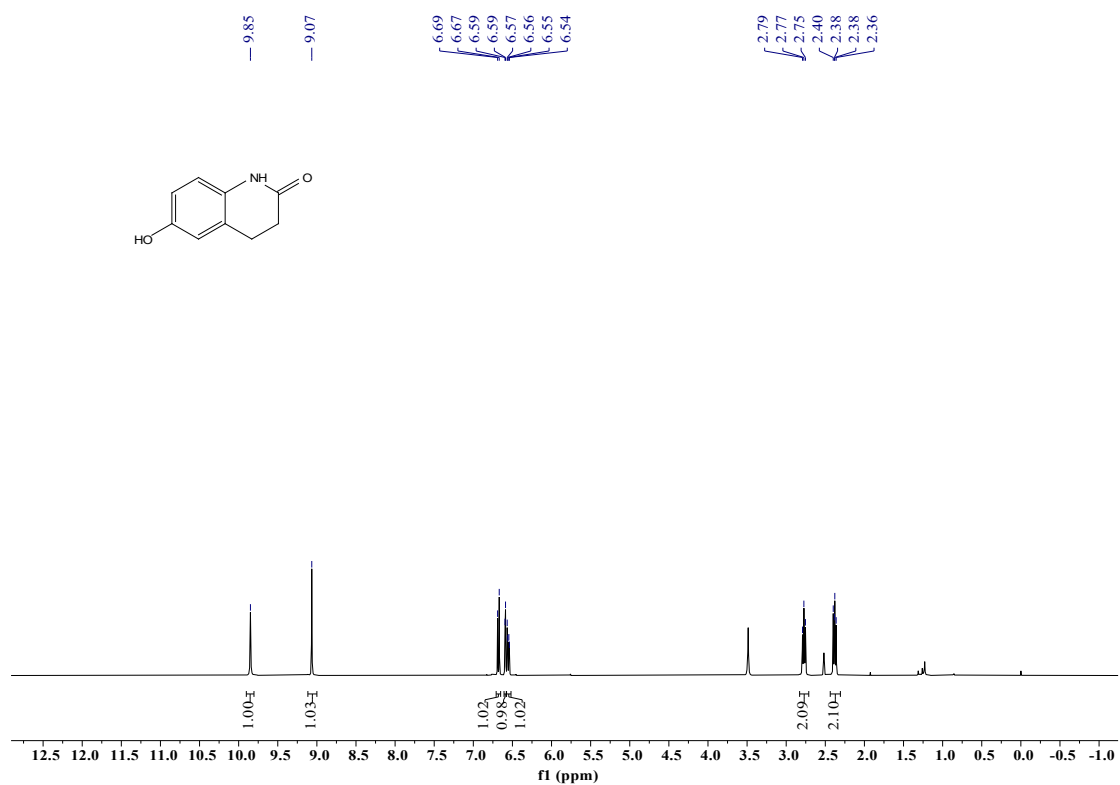

### <sup>13</sup>C NMR spectrum of 6-hydroxy-3,4-dihydroquinolin-2(1H)-one (2d)

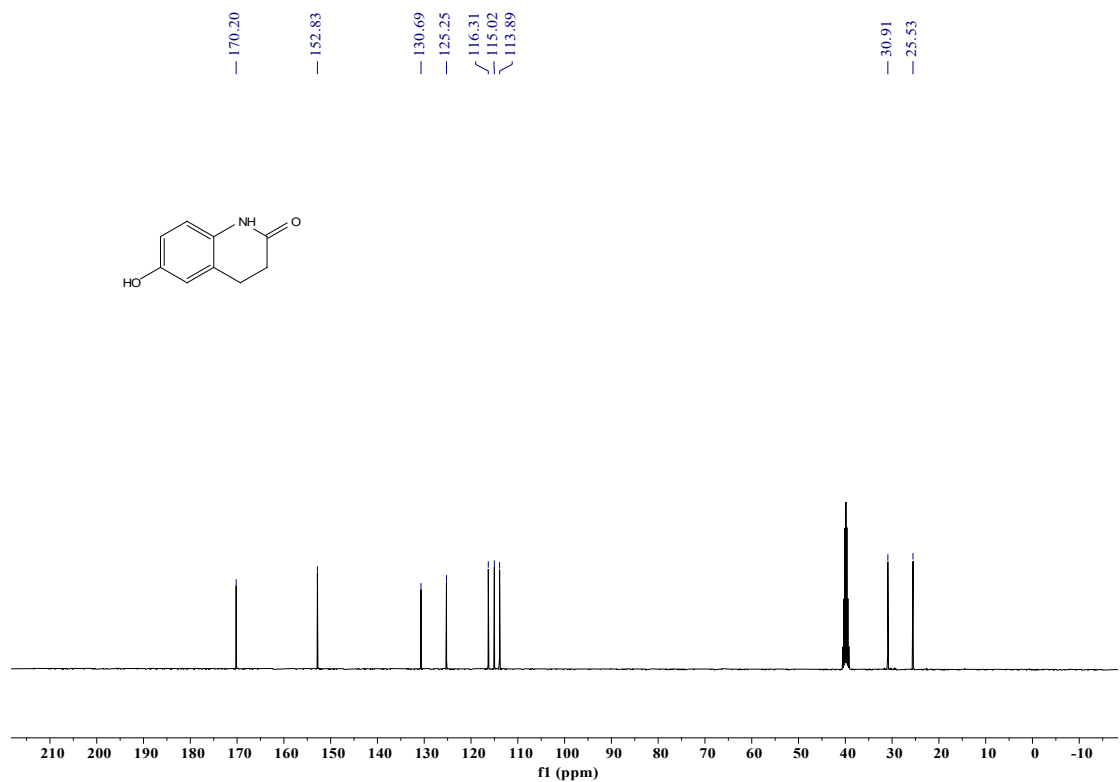

### <sup>1</sup>H NMR spectrum of 7-hydroxy-3,4-dihydroquinolin-2(1H)-one (2e)

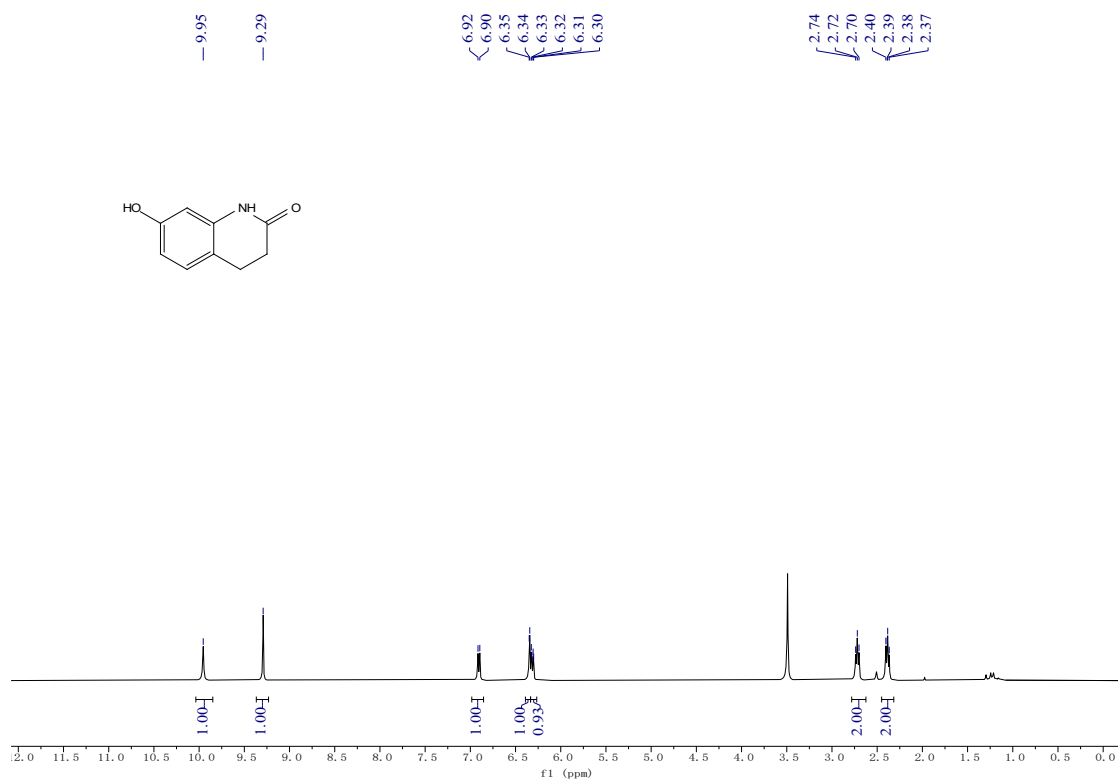

### <sup>13</sup>C NMR spectrum of 7-hydroxy-3,4-dihydroquinolin-2(1H)-one (2e)

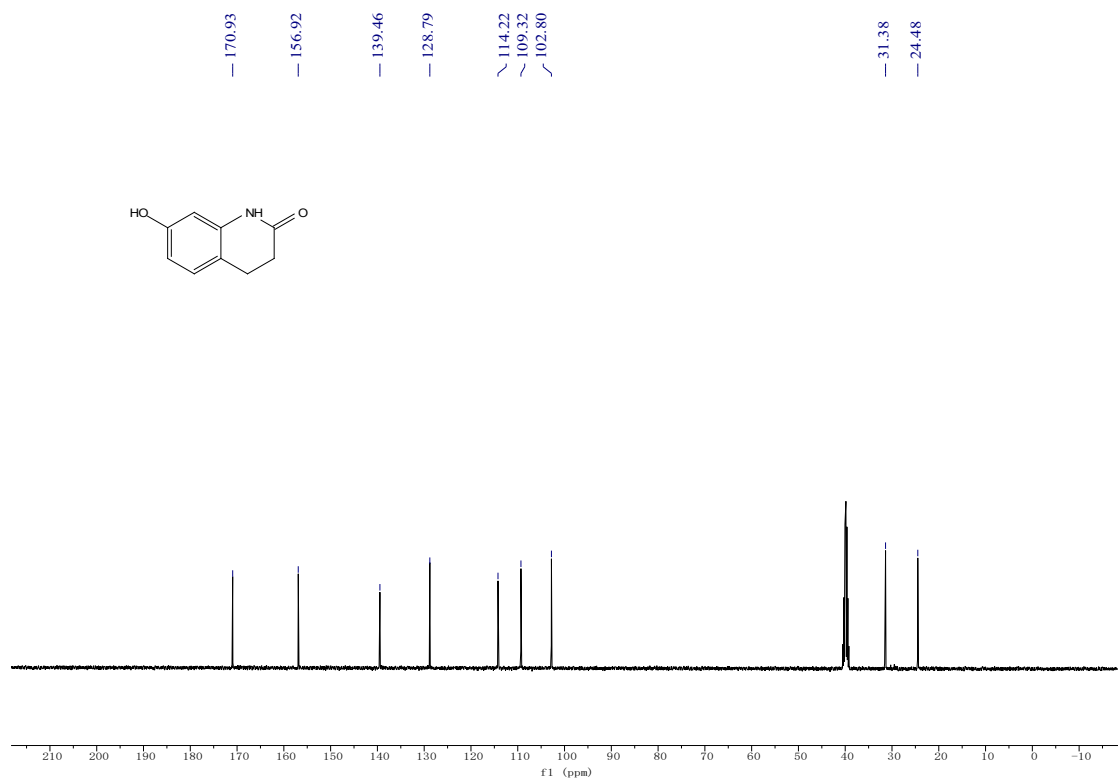

**<sup>1</sup>H NMR spectrum of 8-hydroxy-3,4-dihydroquinolin-2(1H)-one (2f)**

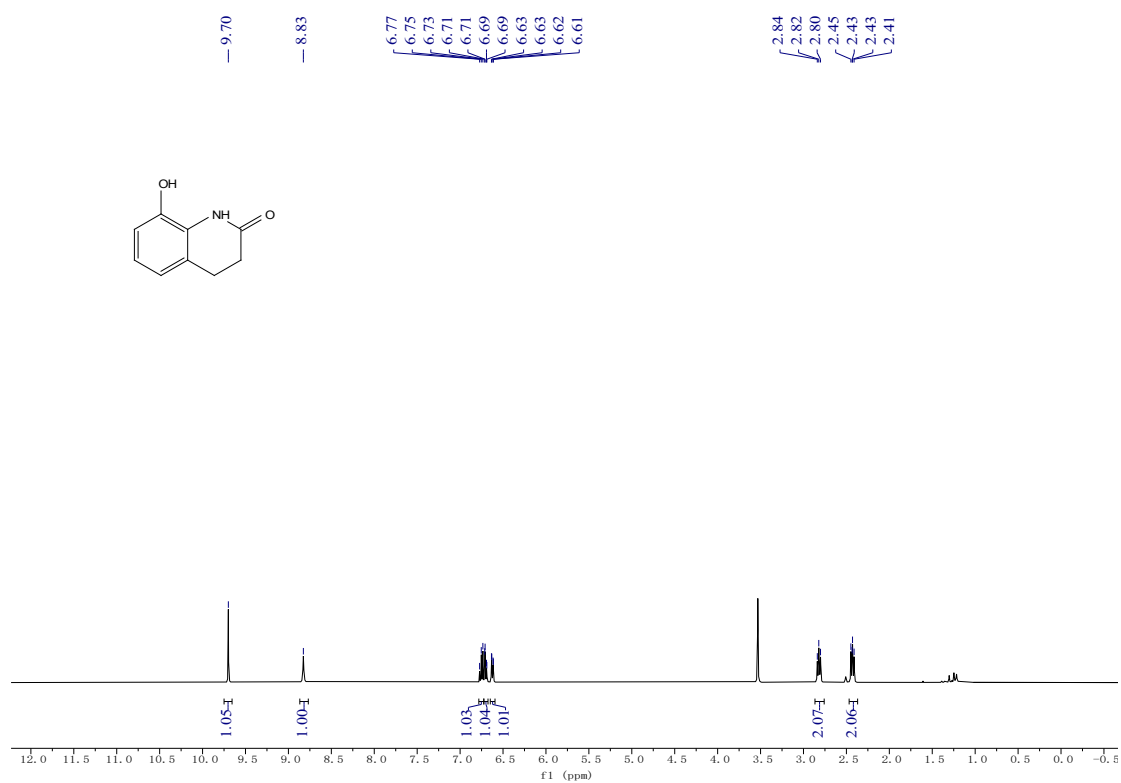

**<sup>13</sup>C NMR spectrum of 8-hydroxy-3,4-dihydroquinolin-2(1H)-one (2f)**

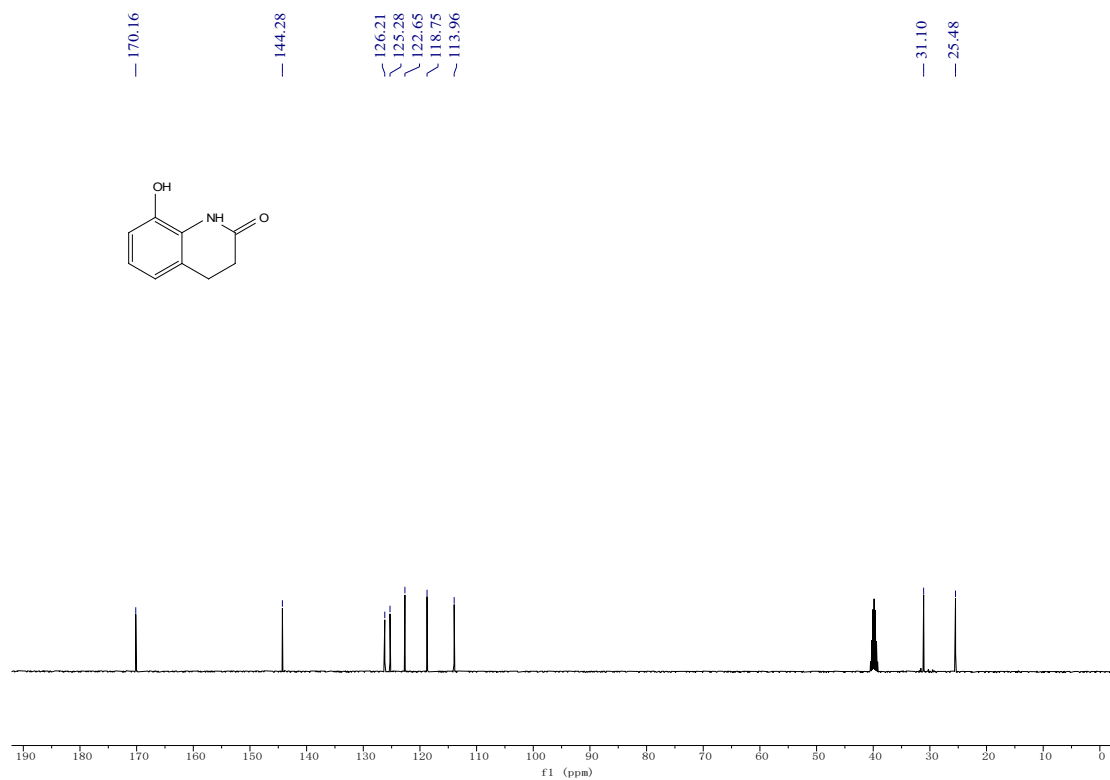

### <sup>1</sup>H NMR spectrum of 6-methyl-3,4-dihydroquinolin-2(1H)-one (2g)

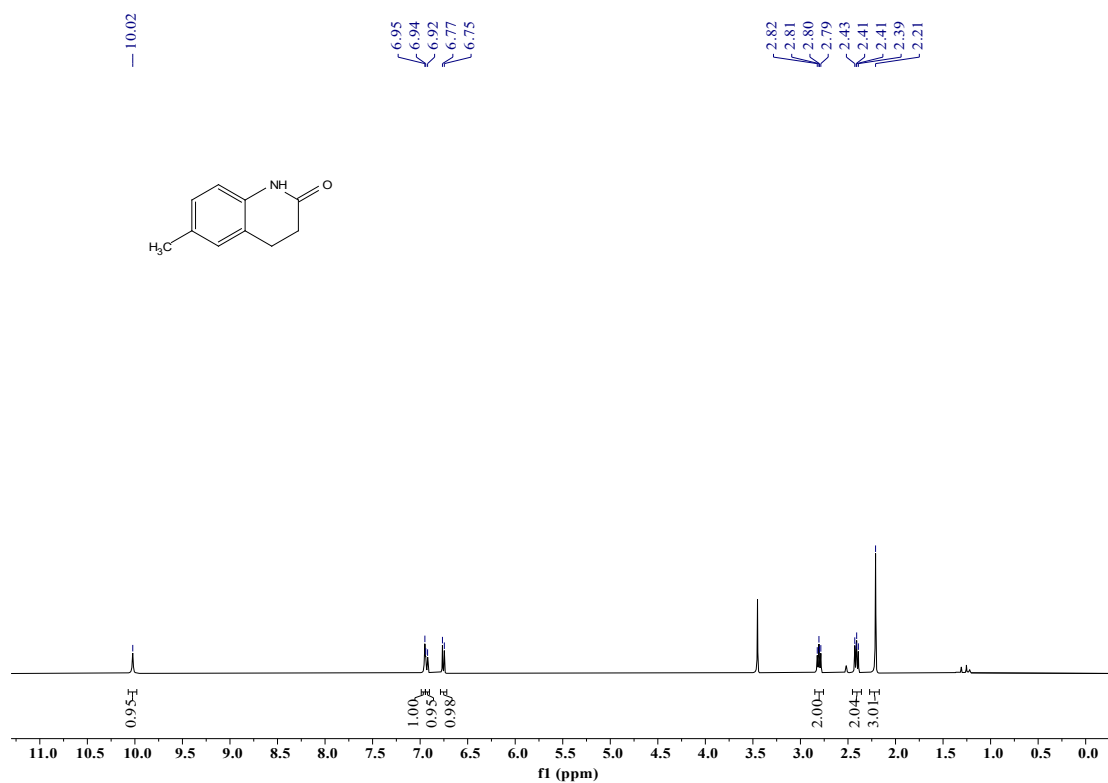

### <sup>13</sup>C NMR spectrum of 6-methyl-3,4-dihydroquinolin-2(1H)-one (2g)

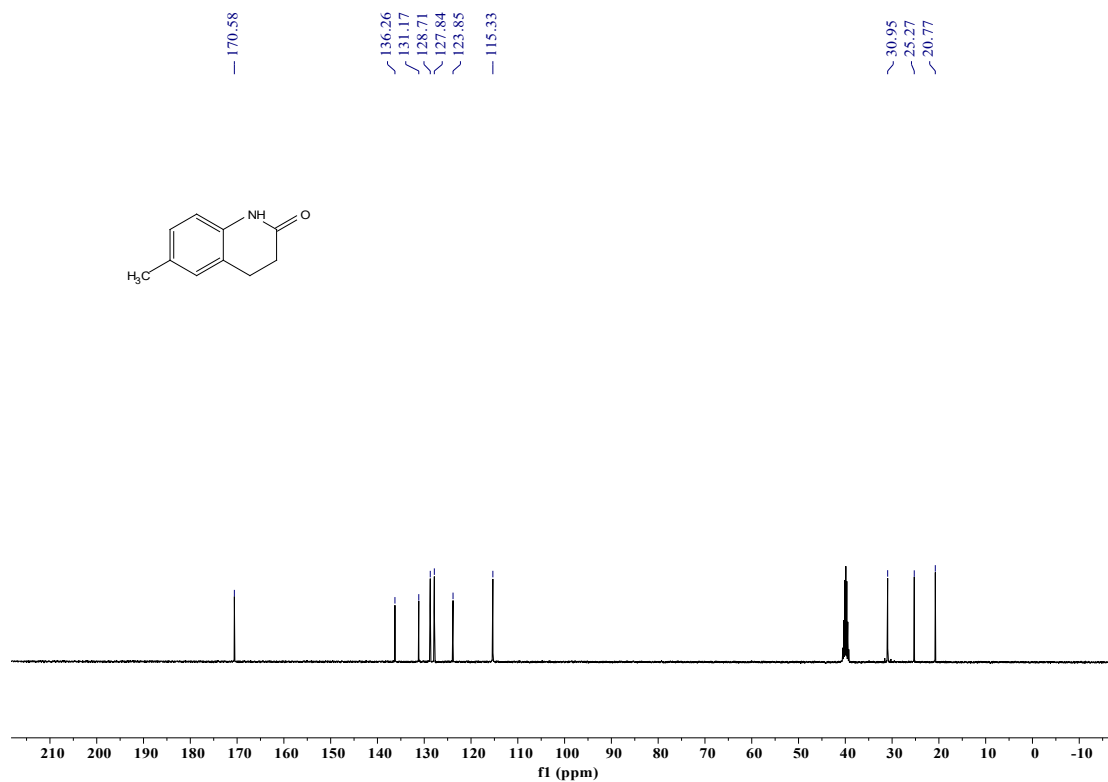

### <sup>1</sup>H NMR spectrum of 8-methyl-3,4-dihydroquinolin-2(1H)-one (2h)

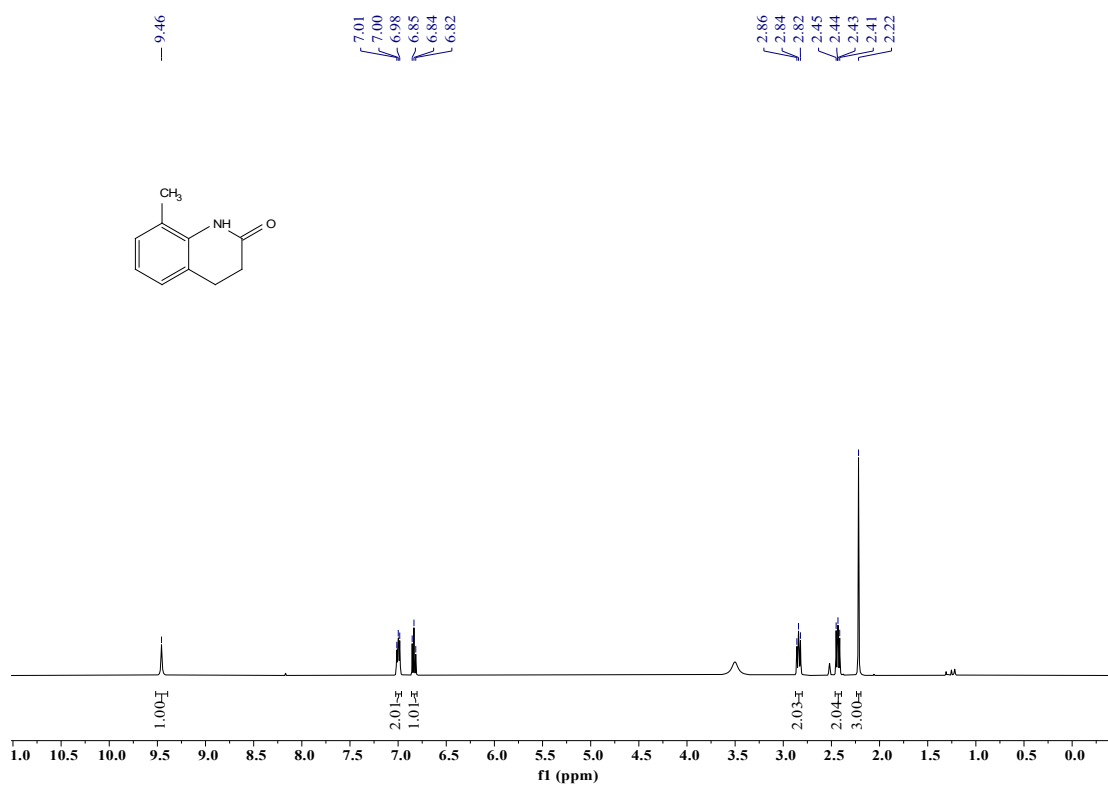

### <sup>13</sup>C NMR spectrum of 8-methyl-3,4-dihydroquinolin-2(1H)-one (2h)

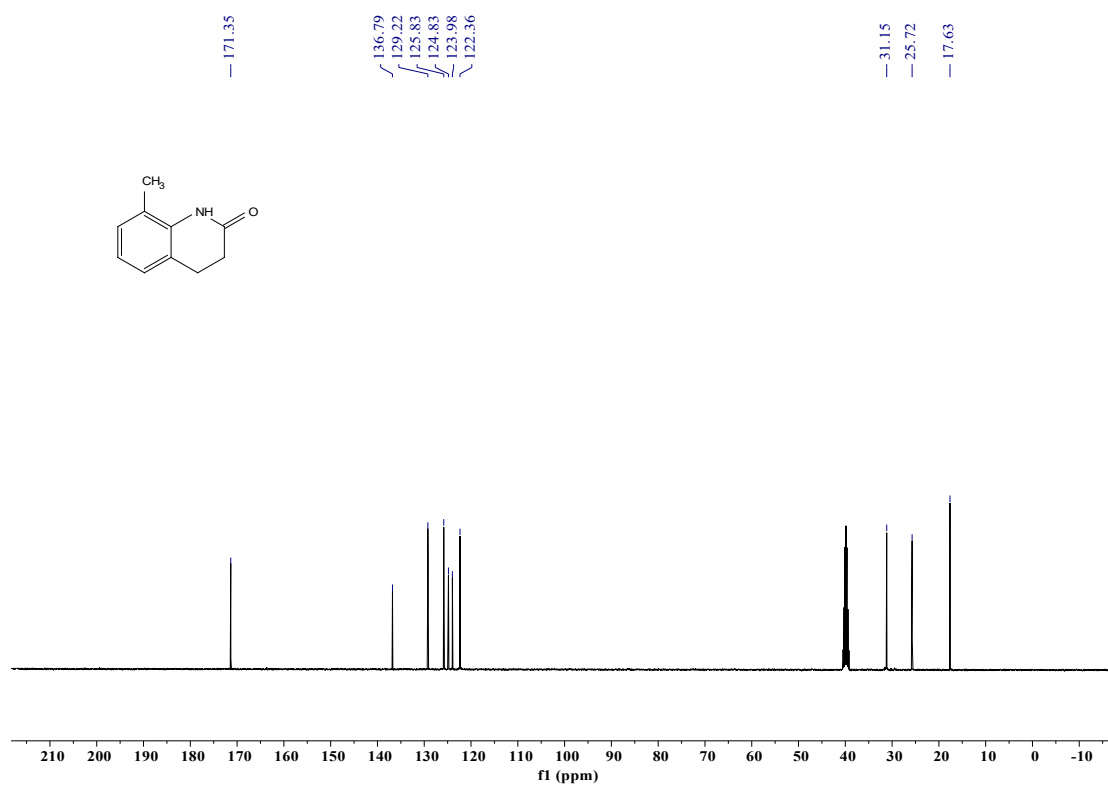

### <sup>1</sup>H NMR spectrum of 8-fluoro-3,4-dihydroquinolin-2(1H)-one (2i)

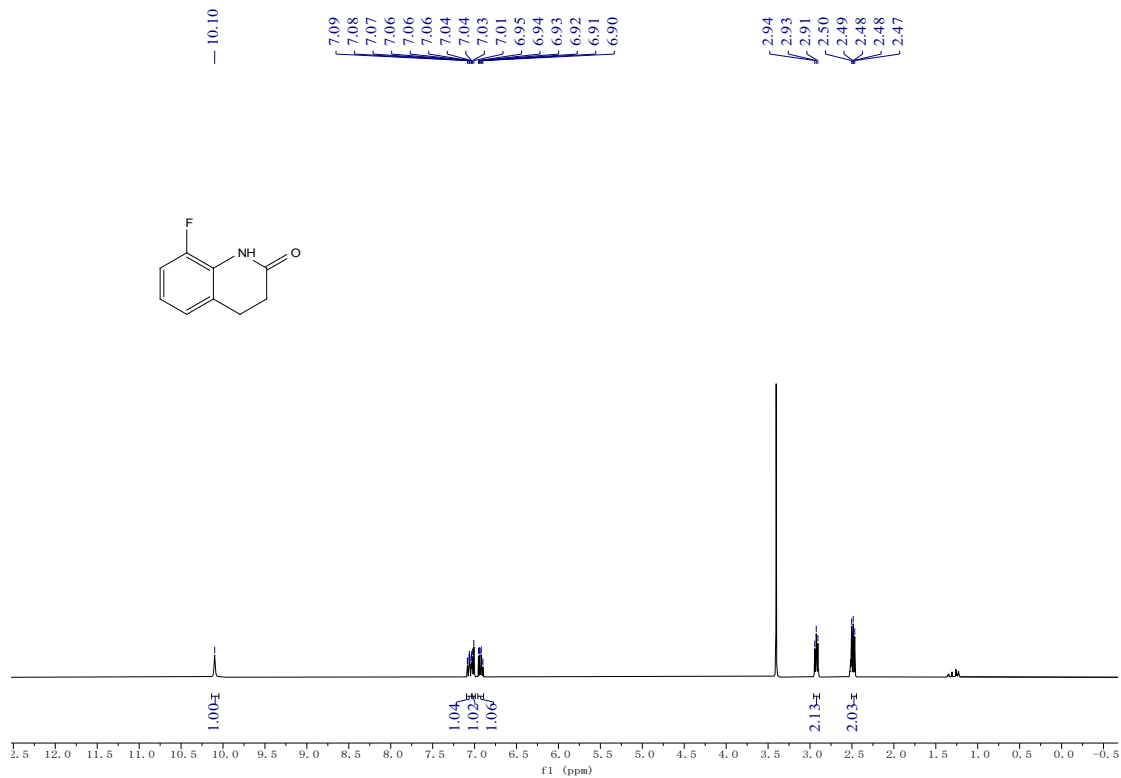

### <sup>13</sup>C NMR spectrum of 8-fluoro-3,4-dihydroquinolin-2(1H)-one (2i)

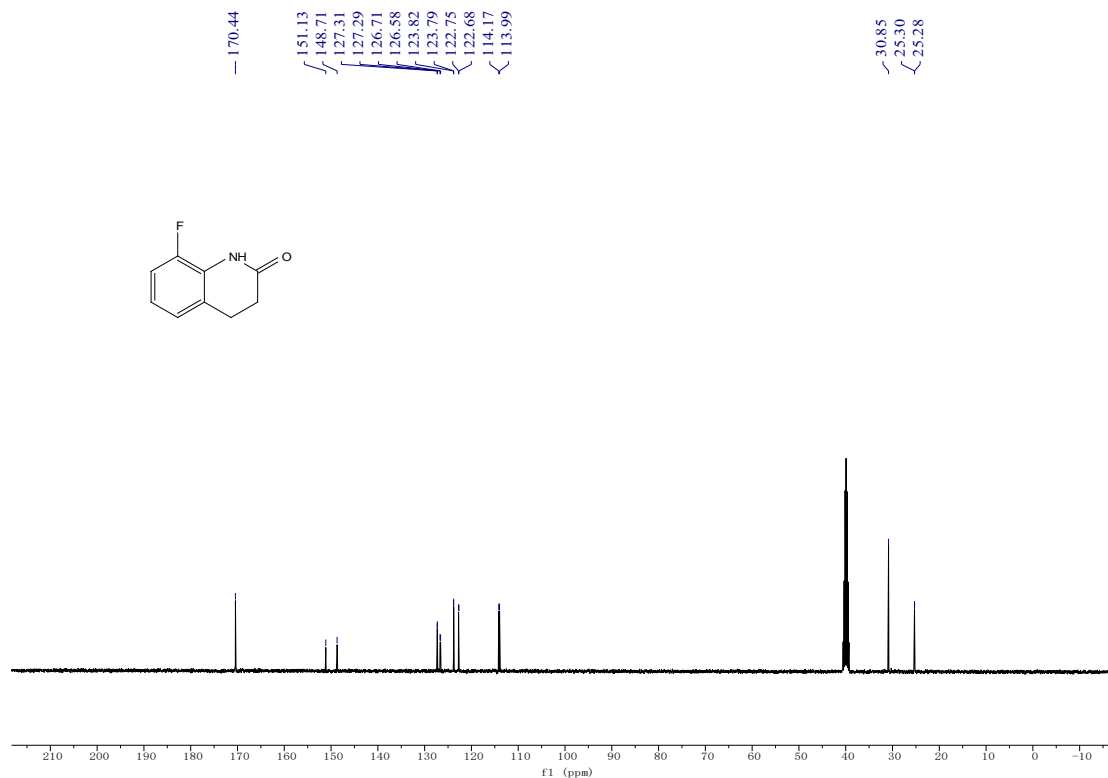

**<sup>19</sup>F NMR spectrum of 8-fluoro-3,4-dihydroquinolin-2(1H)-one (2i)**

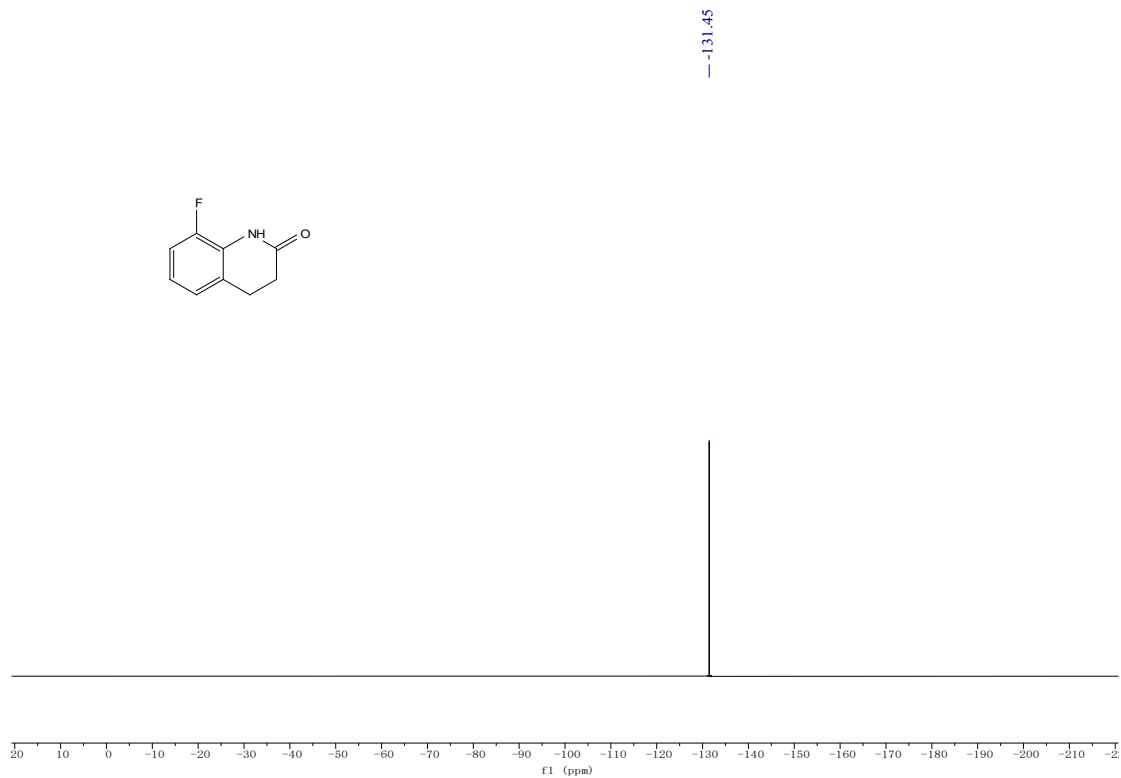

**<sup>1</sup>H NMR spectrum of 6-fluoro-3,4-dihydroquinolin-2(1H)-one (2j)**

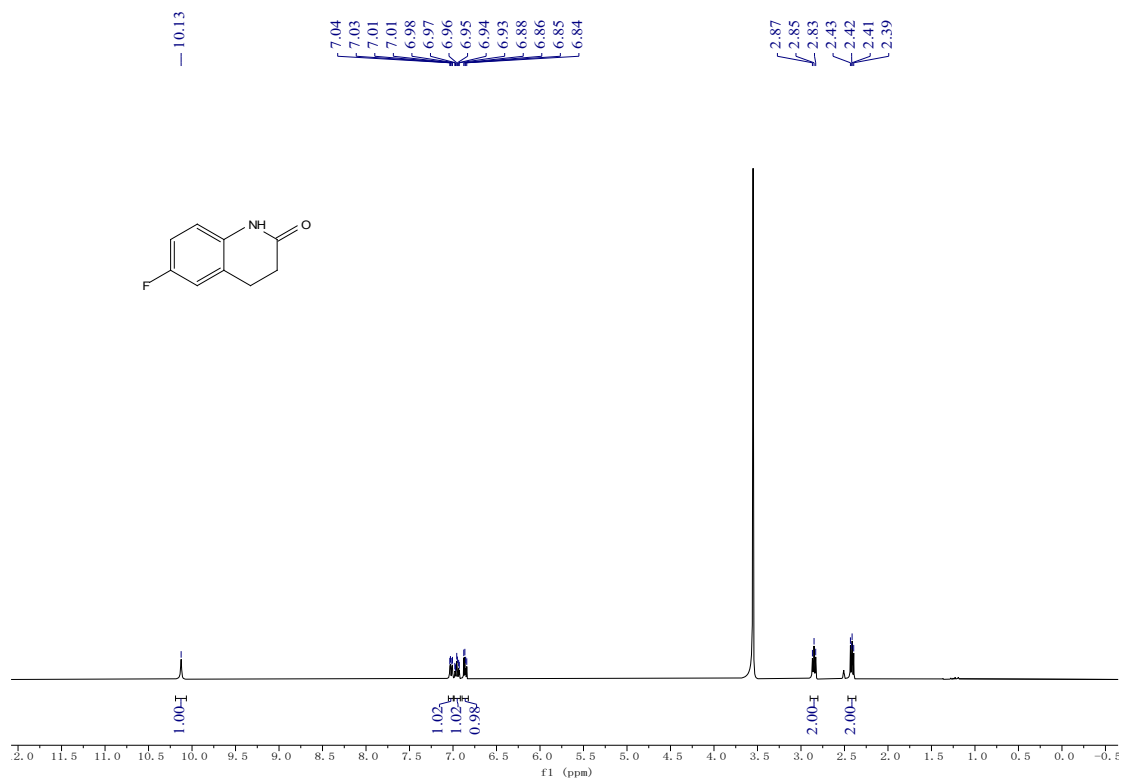

### <sup>13</sup>C NMR spectrum of 6-fluoro-3,4-dihydroquinolin-2(1H)-one (2j)

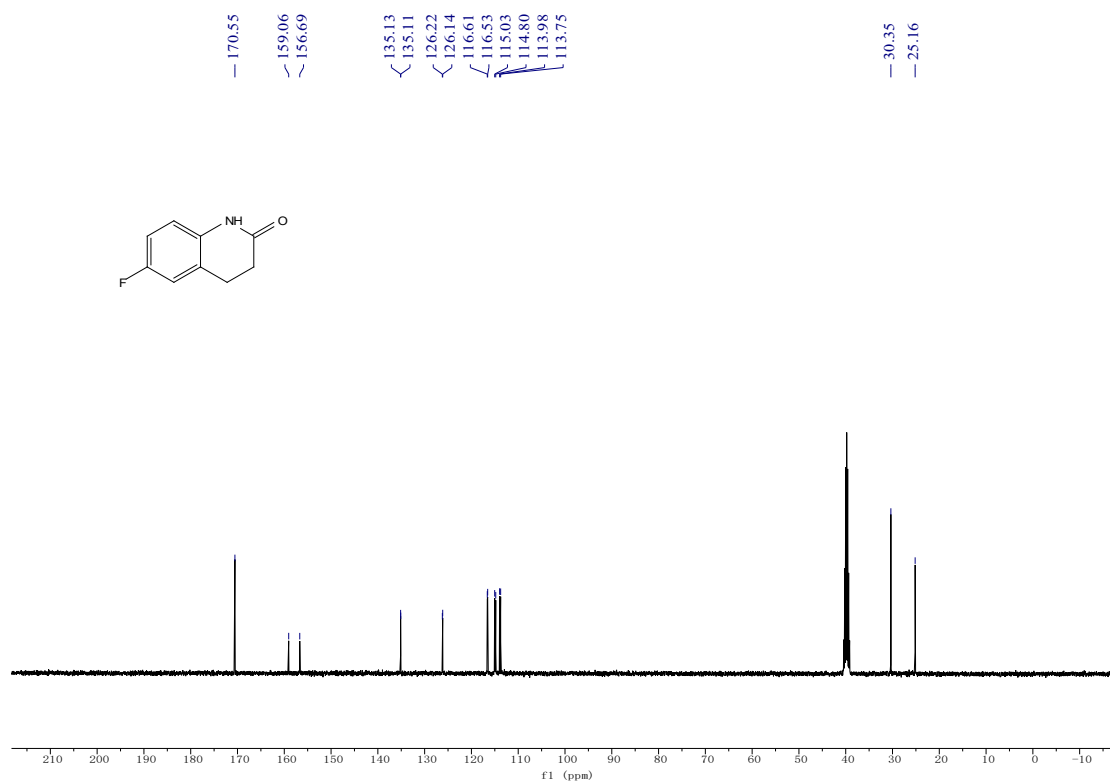

### <sup>19</sup>F NMR spectrum of 6-fluoro-3,4-dihydroquinolin-2(1H)-one (2j)

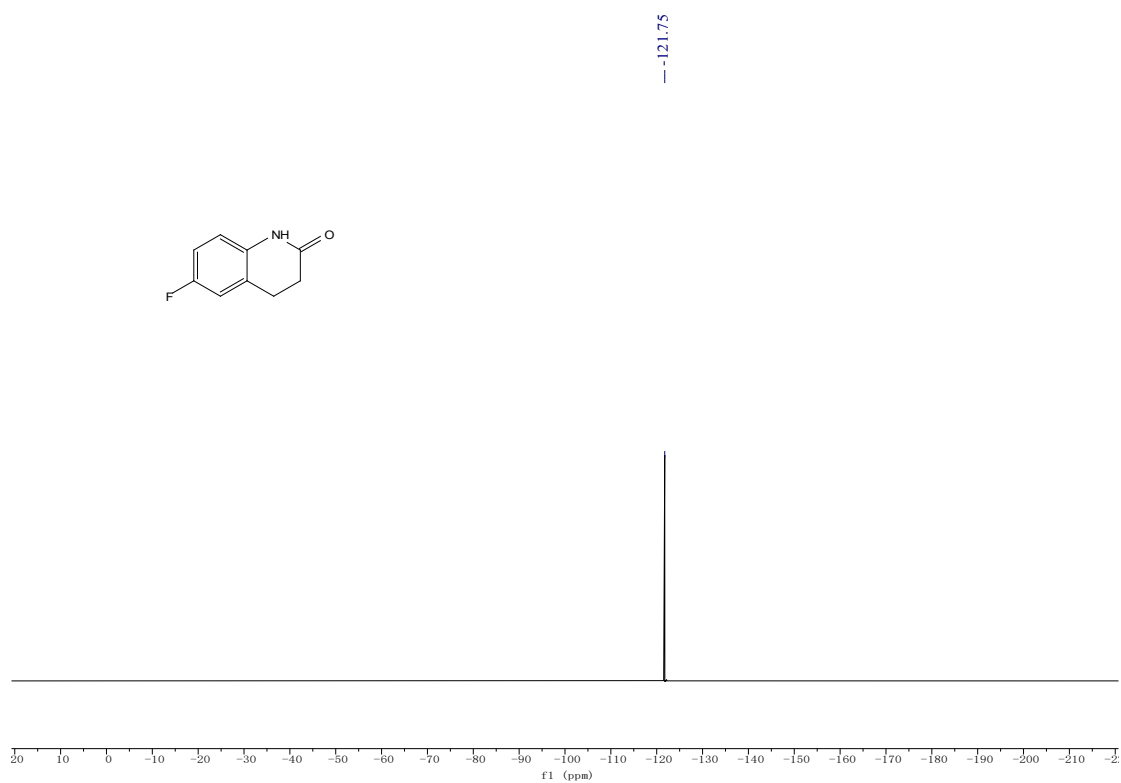



**<sup>1</sup>H NMR spectrum of 6-chloro-3,4-dihydroquinolin-2(1H)-one (2k)**

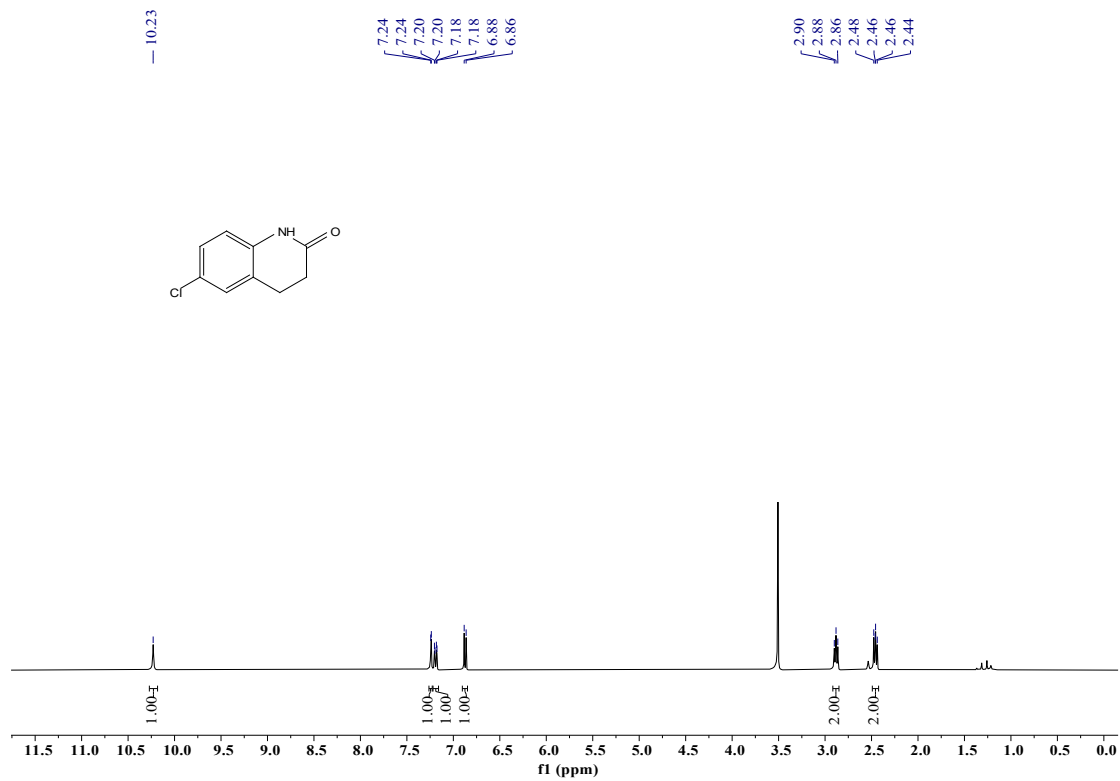

**<sup>13</sup>C NMR spectrum of 6-chloro-3,4-dihydroquinolin-2(1H)-one (2k)**

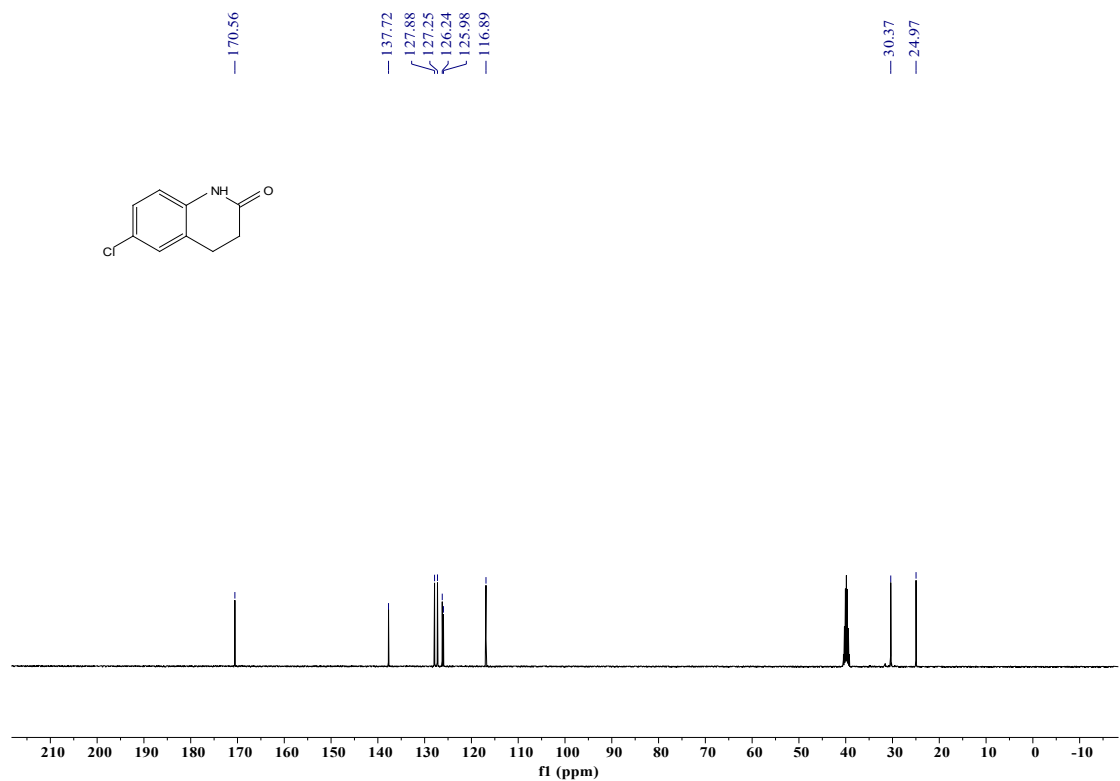

**<sup>1</sup>H NMR spectrum of 8-chloro-3,4-dihydroquinolin-2(1H)-one (21)**

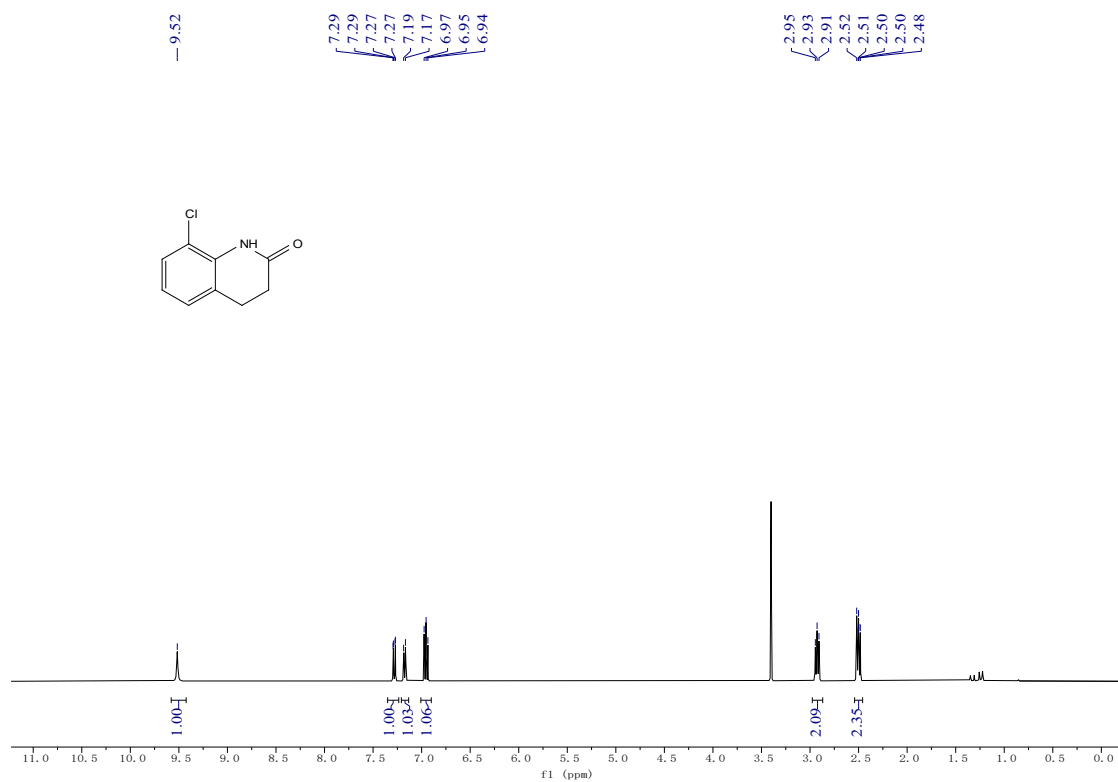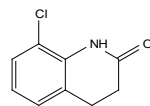

**<sup>13</sup>C NMR spectrum of 8-chloro-3,4-dihydroquinolin-2(1H)-one (21)**

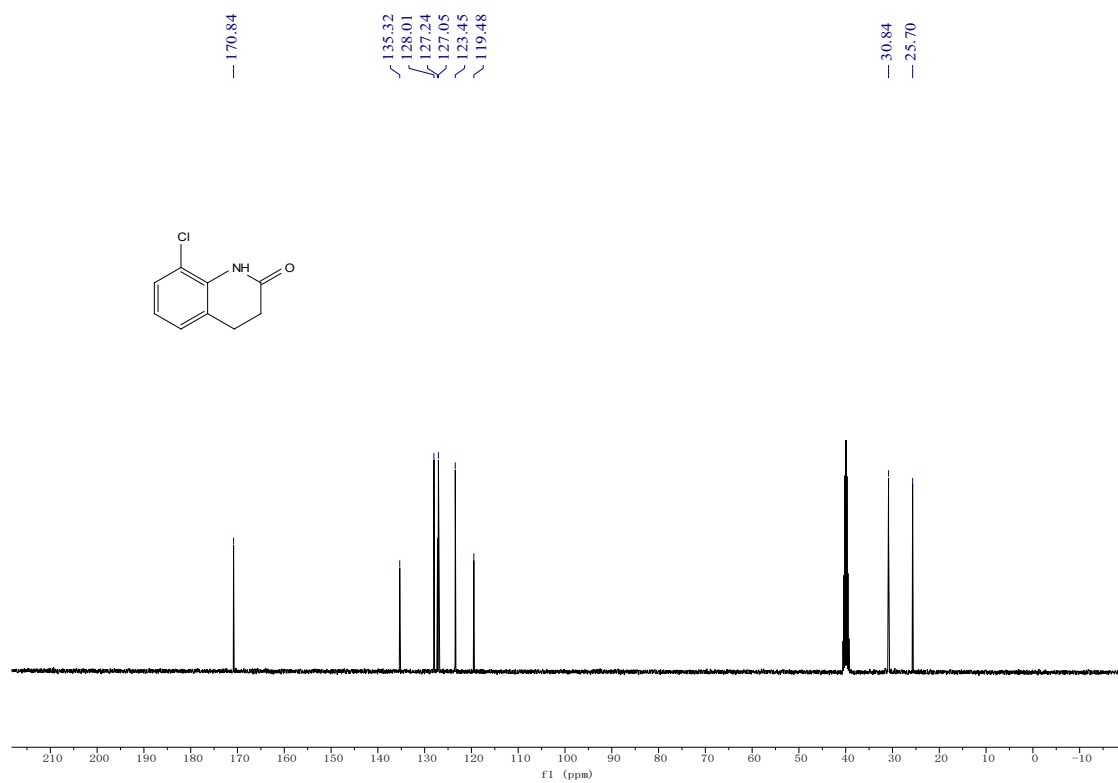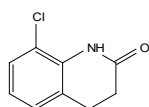

**<sup>1</sup>H NMR spectrum of 5-chloro-3,4-dihydroquinolin-2(1H)-one (2m)**

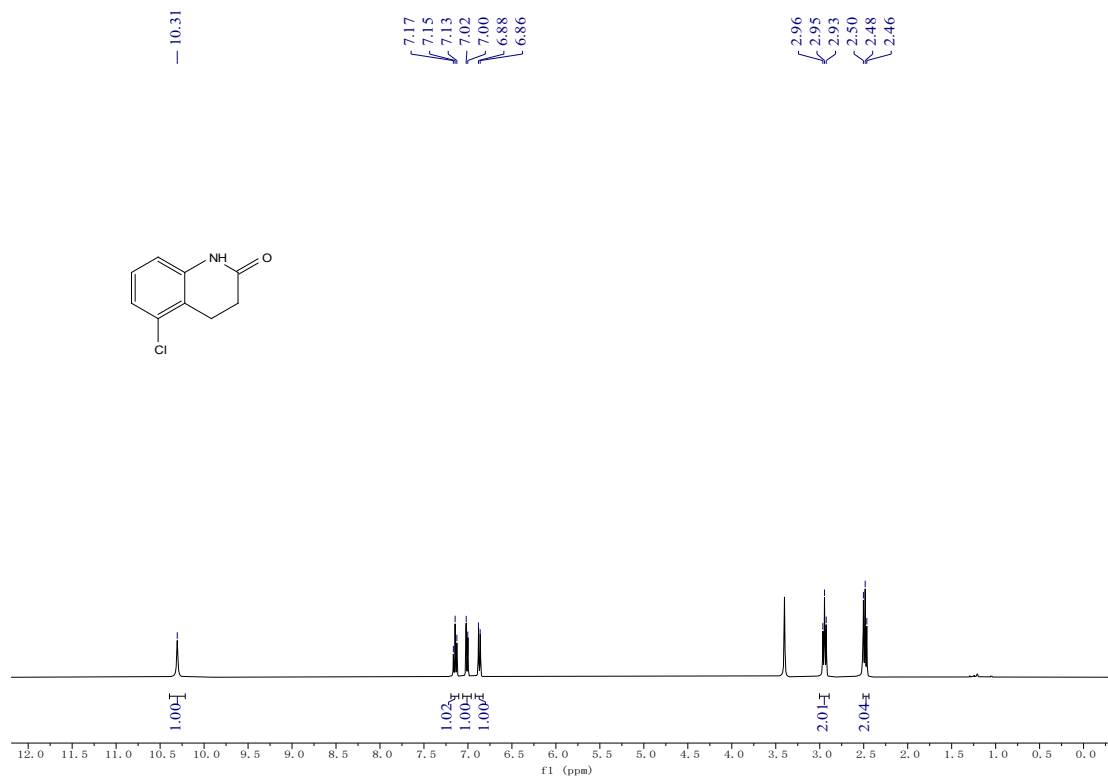

**<sup>13</sup>C NMR spectrum of 5-chloro-3,4-dihydroquinolin-2(1H)-one (2m)**

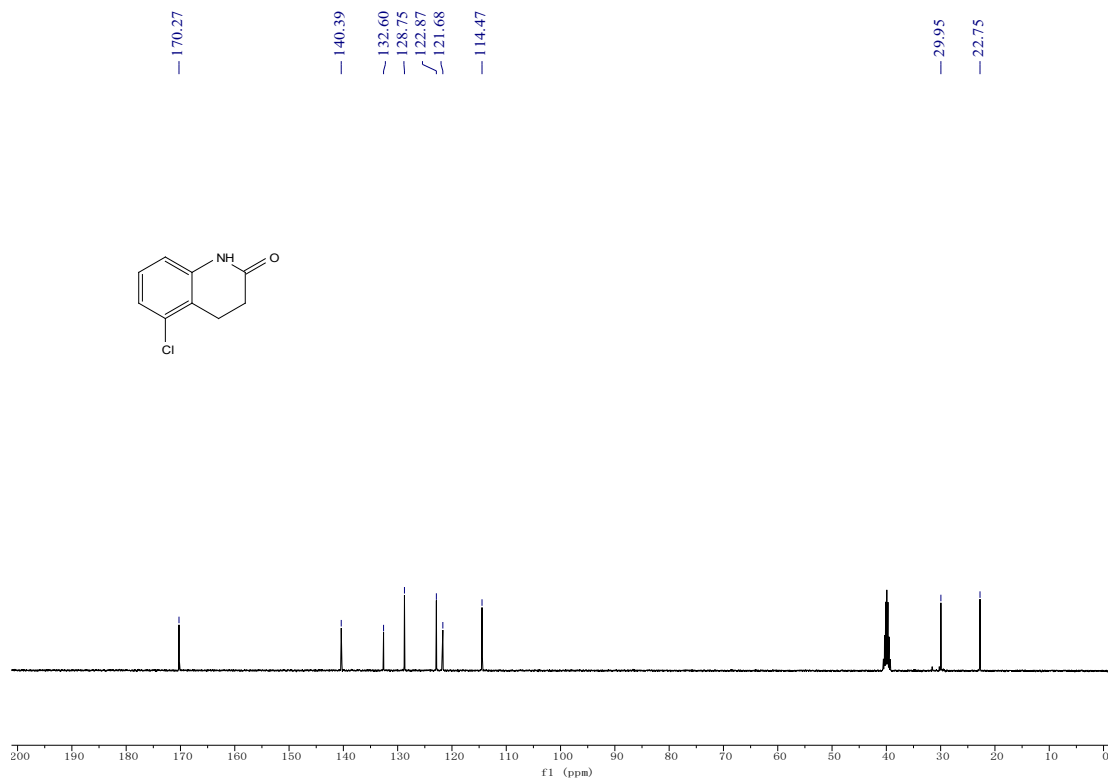

### <sup>1</sup>H NMR spectrum of 8-bromo-3,4-dihydroquinolin-2(1H)-one (2n)

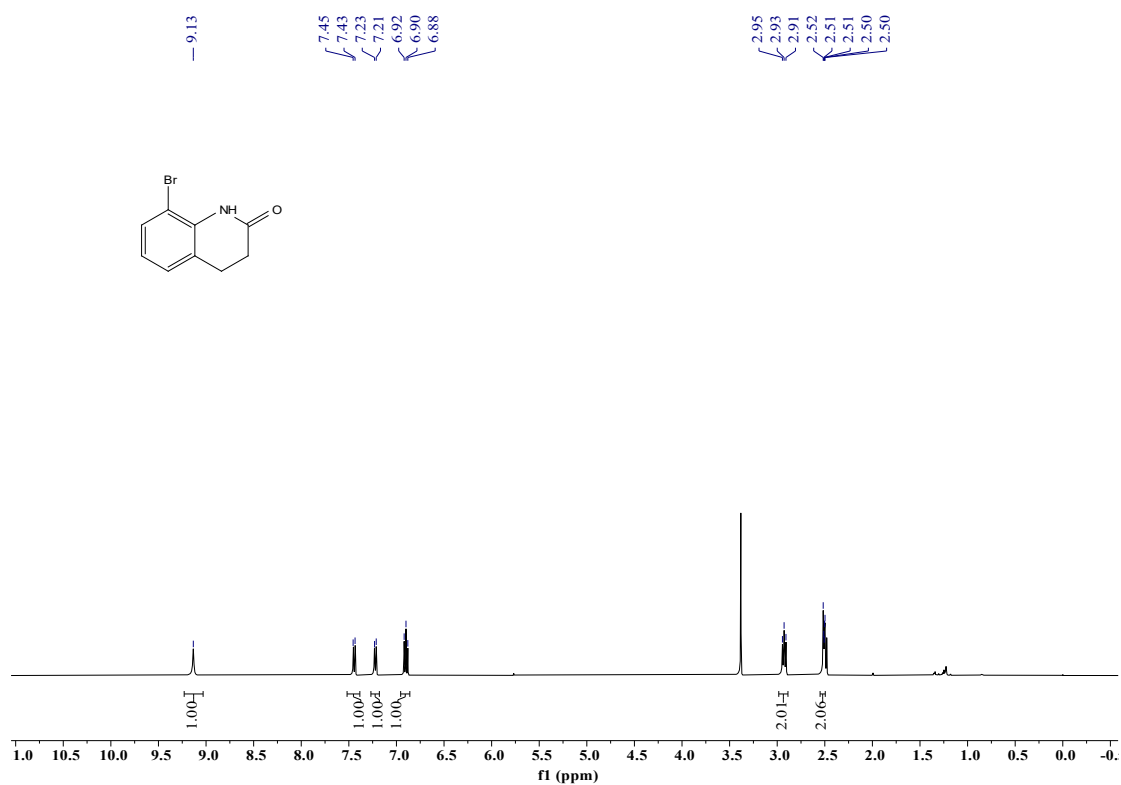

### <sup>13</sup>C NMR spectrum of 8-bromo-3,4-dihydroquinolin-2(1H)-one (2n)

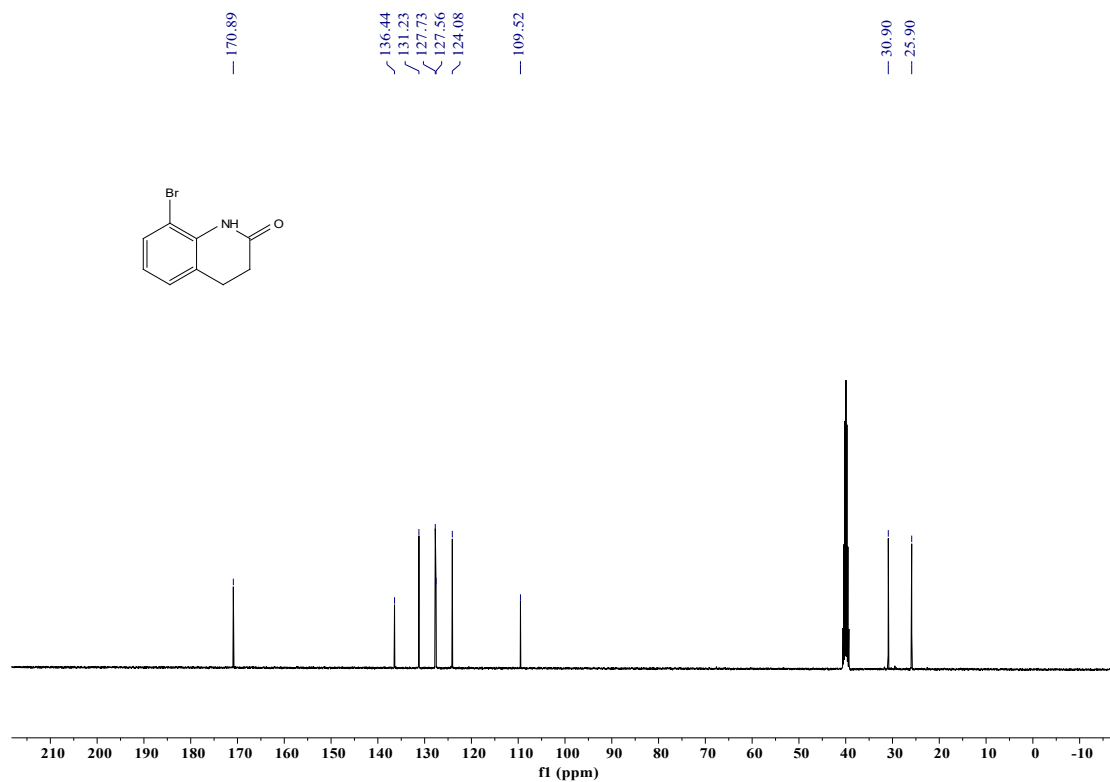

### <sup>1</sup>H NMR spectrum of 7-bromo-3,4-dihydroquinolin-2(1H)-one (2o)

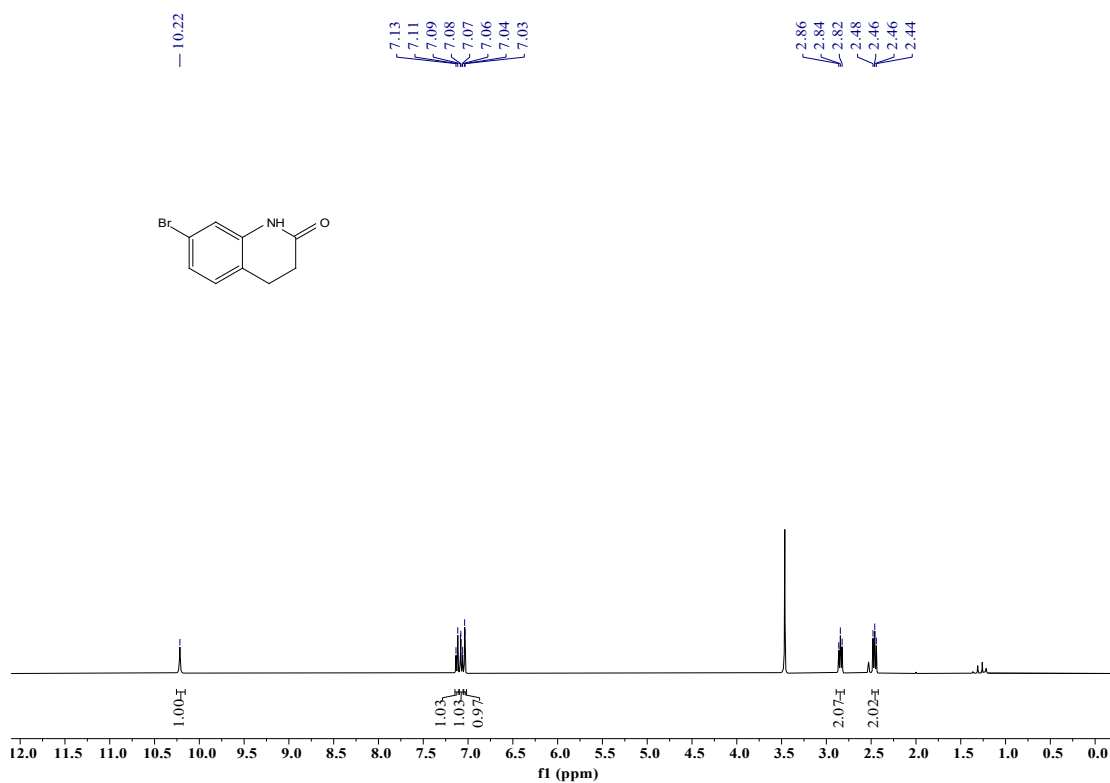

### <sup>13</sup>C NMR spectrum of 7-bromo-3,4-dihydroquinolin-2(1H)-one (2o)

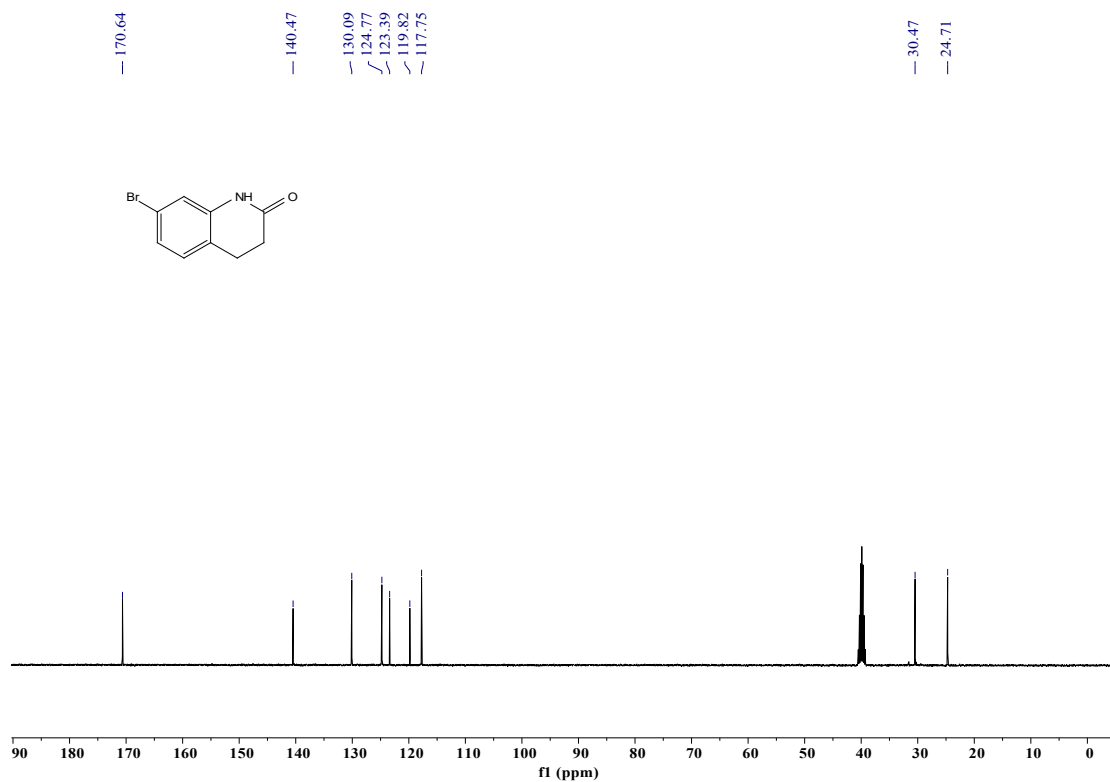

### <sup>1</sup>H NMR spectrum of 6-bromo-3,4-dihydroquinolin-2(1H)-one (2p)

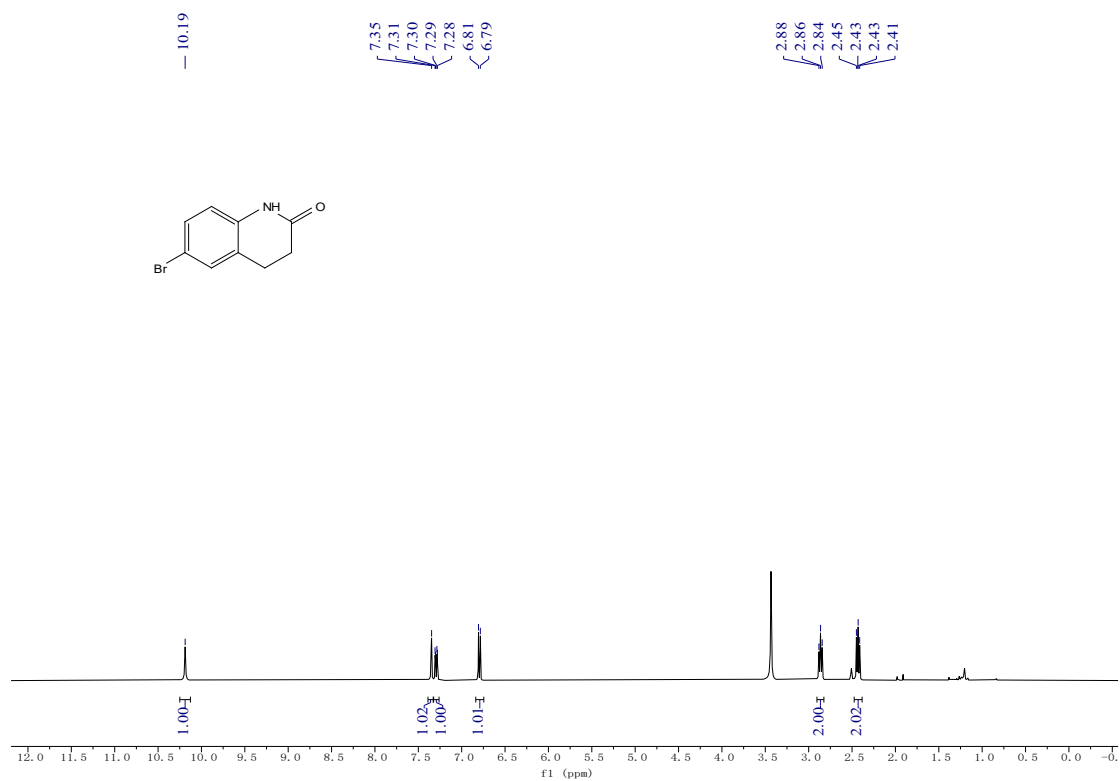

### <sup>13</sup>C NMR spectrum of 6-bromo-3,4-dihydroquinolin-2(1H)-one (2p)

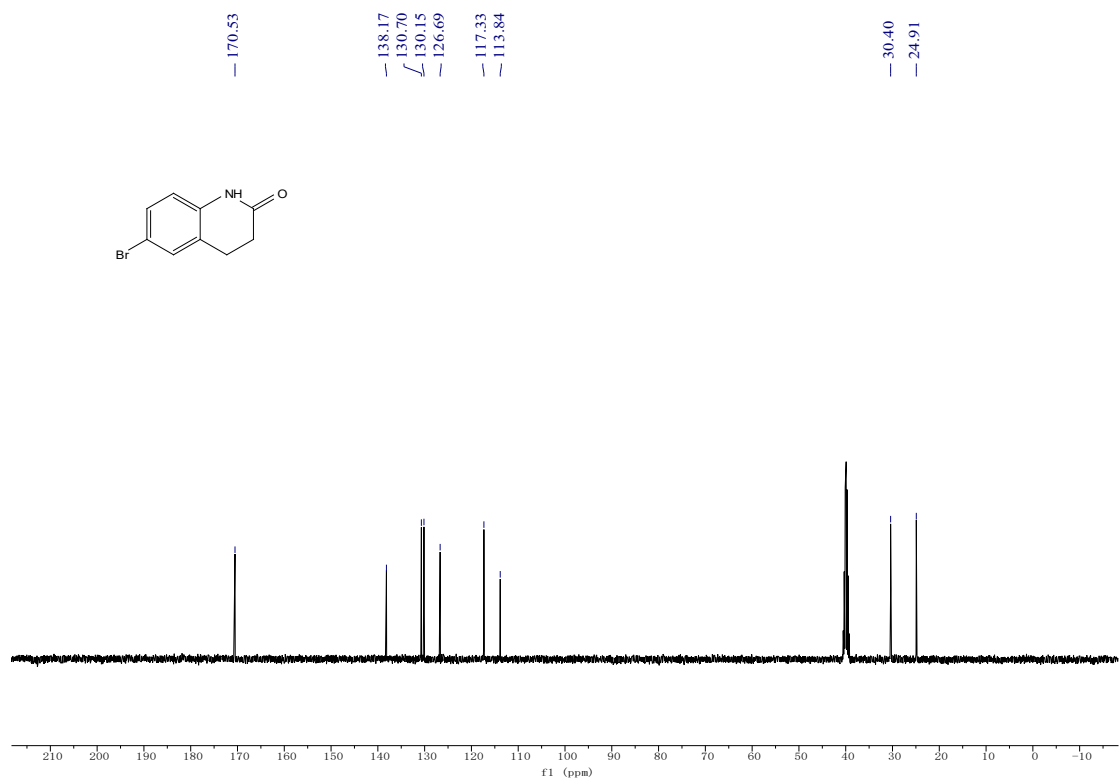

**<sup>1</sup>H NMR spectrum of 6-iodo-3,4-dihydroquinolin-2(1H)-one (2q)**

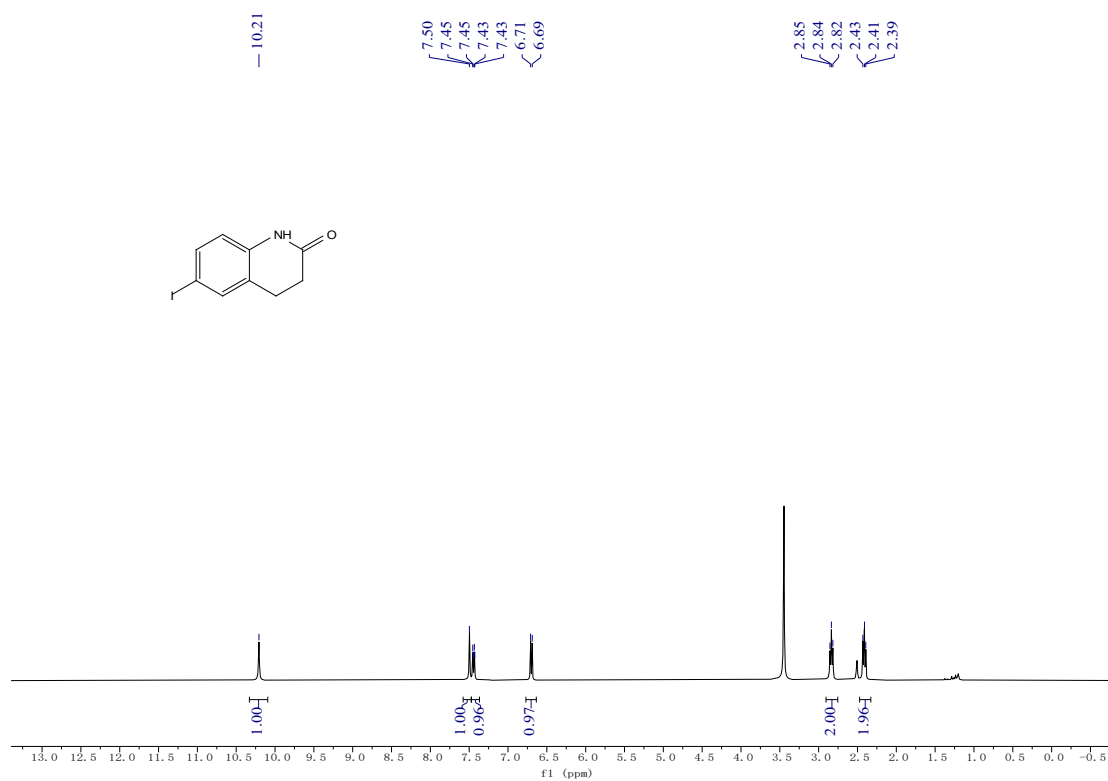

**<sup>13</sup>C NMR spectrum of 6-iodo-3,4-dihydroquinolin-2(1H)-one (2q)**

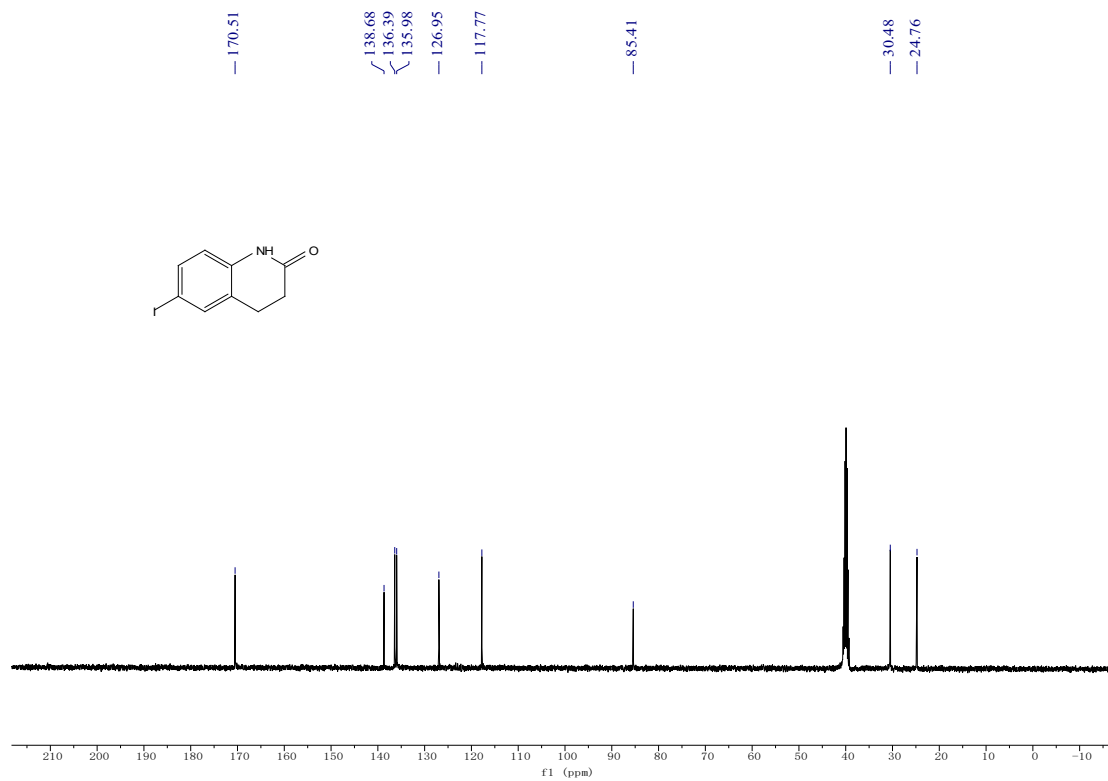

### <sup>1</sup>H NMR spectrum of 2-oxo-1,2,3,4-tetrahydroquinoline-6-carbonitrile (2r)

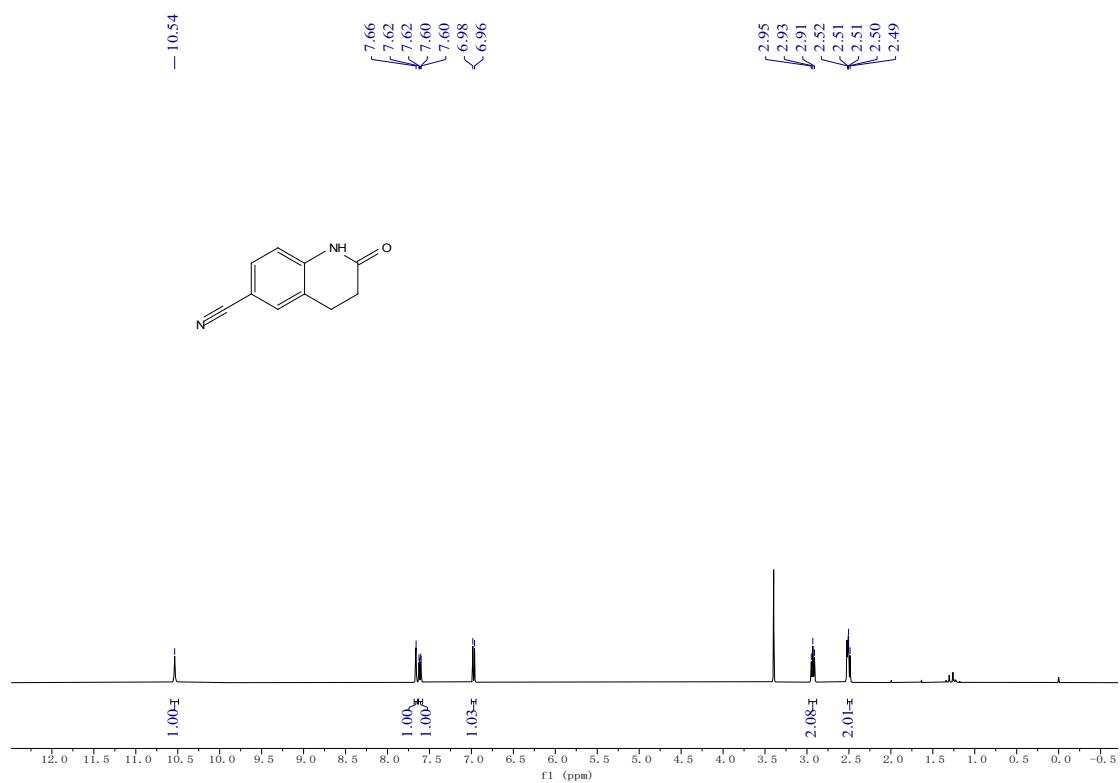

### <sup>13</sup>C NMR spectrum of 2-oxo-1,2,3,4-tetrahydroquinoline-6-carbonitrile (2r)

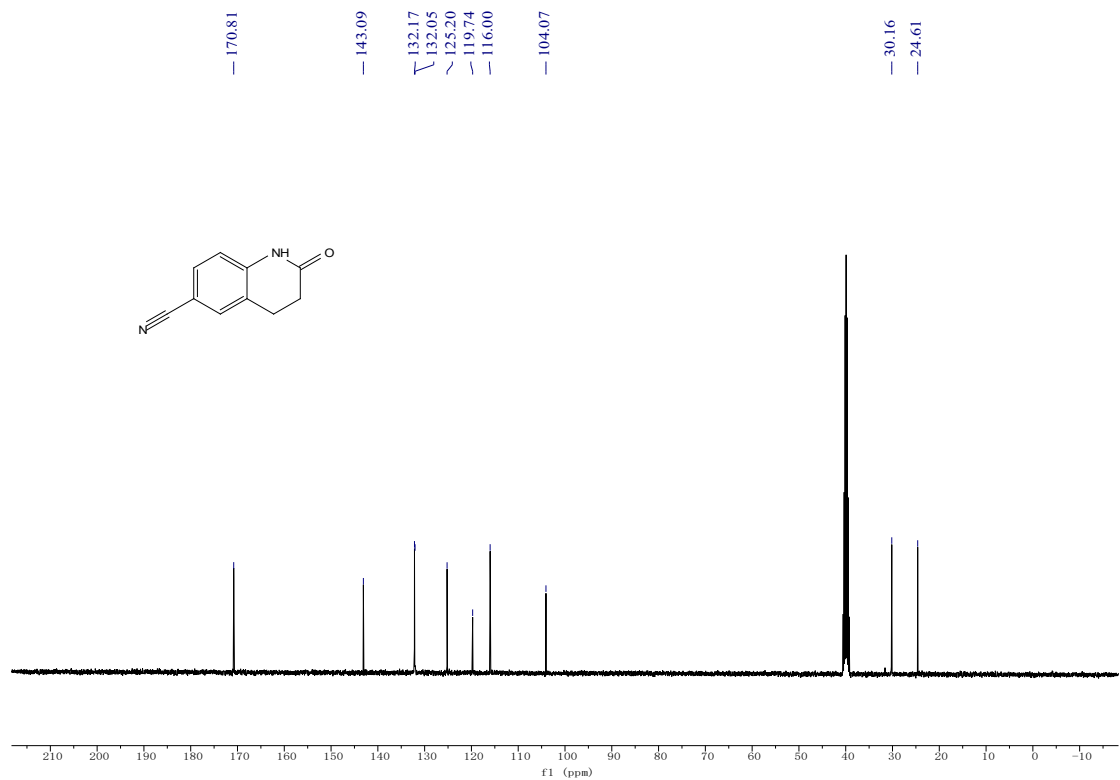



### <sup>1</sup>H NMR spectrum of 5-nitro-3,4-dihydroquinolin-2(1H)-one (2s)

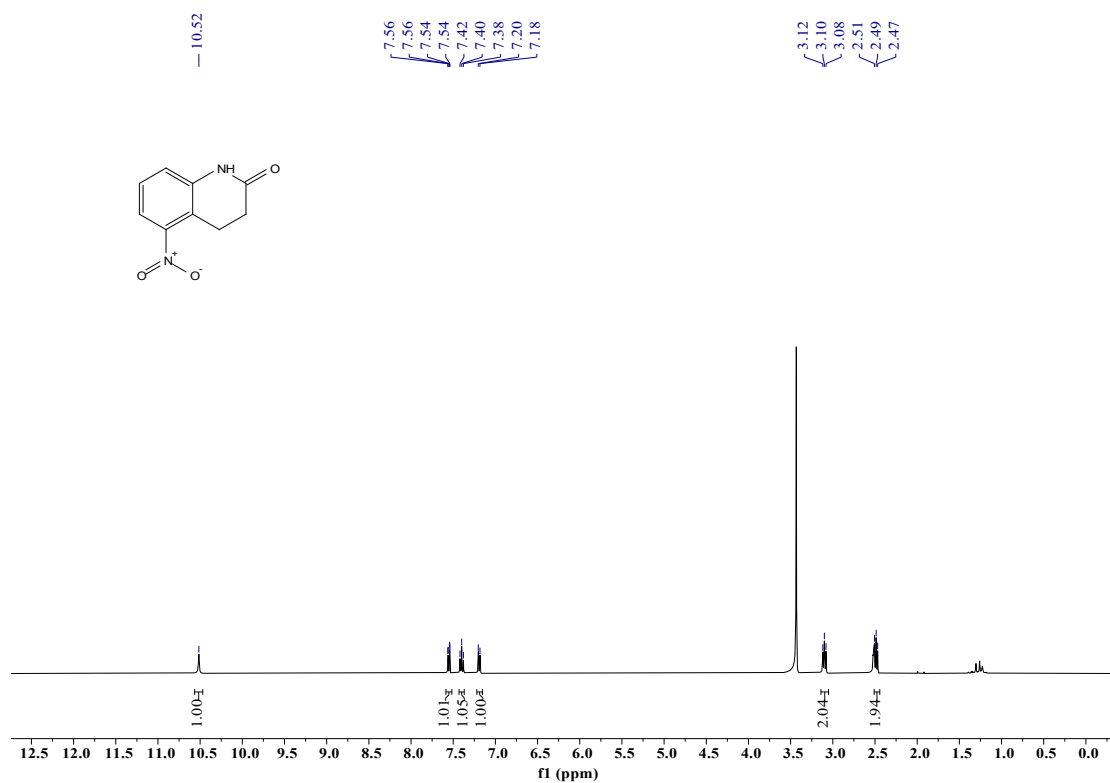

### <sup>13</sup>C NMR spectrum of 5-nitro-3,4-dihydroquinolin-2(1H)-one (2s)

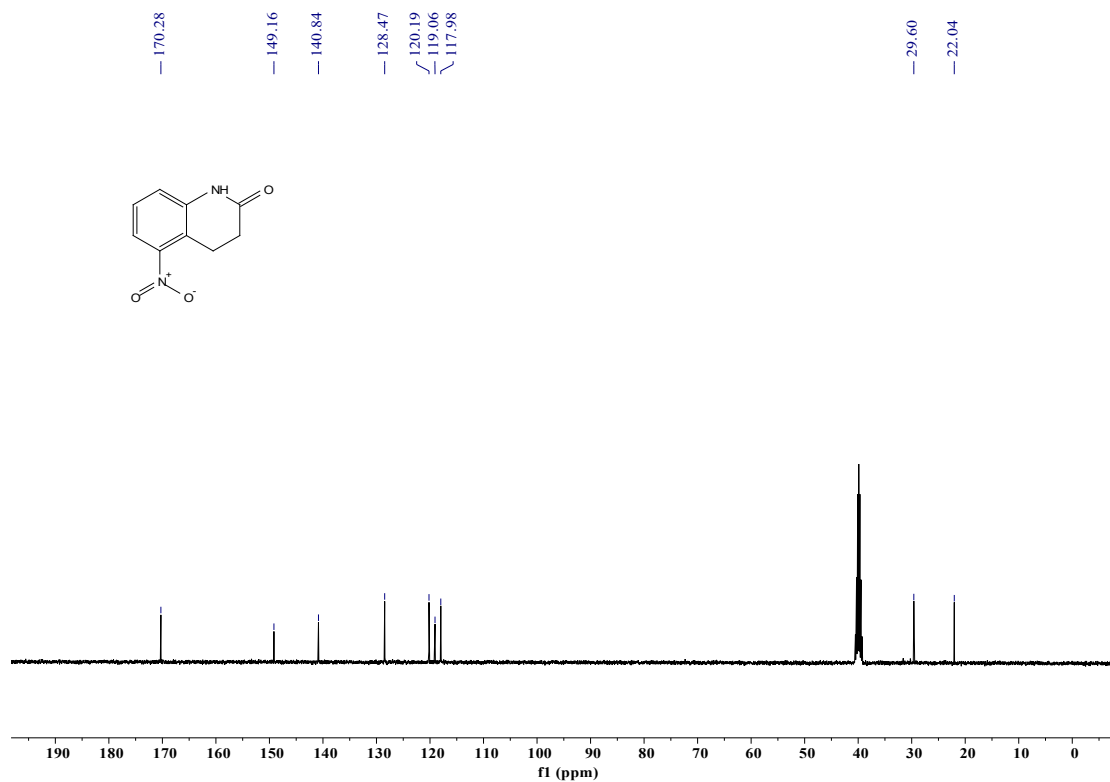

### <sup>1</sup>H NMR spectrum of 8-nitro-3,4-dihydroquinolin-2(1H)-one (2t)

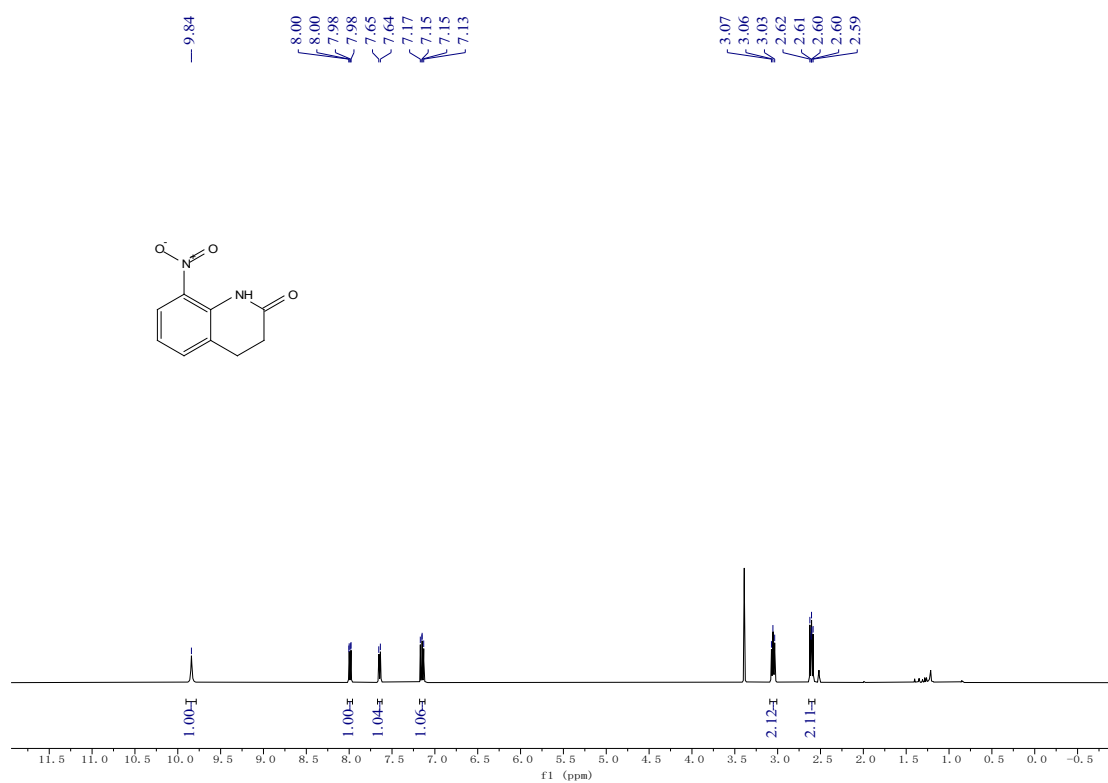

### <sup>13</sup>C NMR spectrum of 8-nitro-3,4-dihydroquinolin-2(1H)-one (2t)

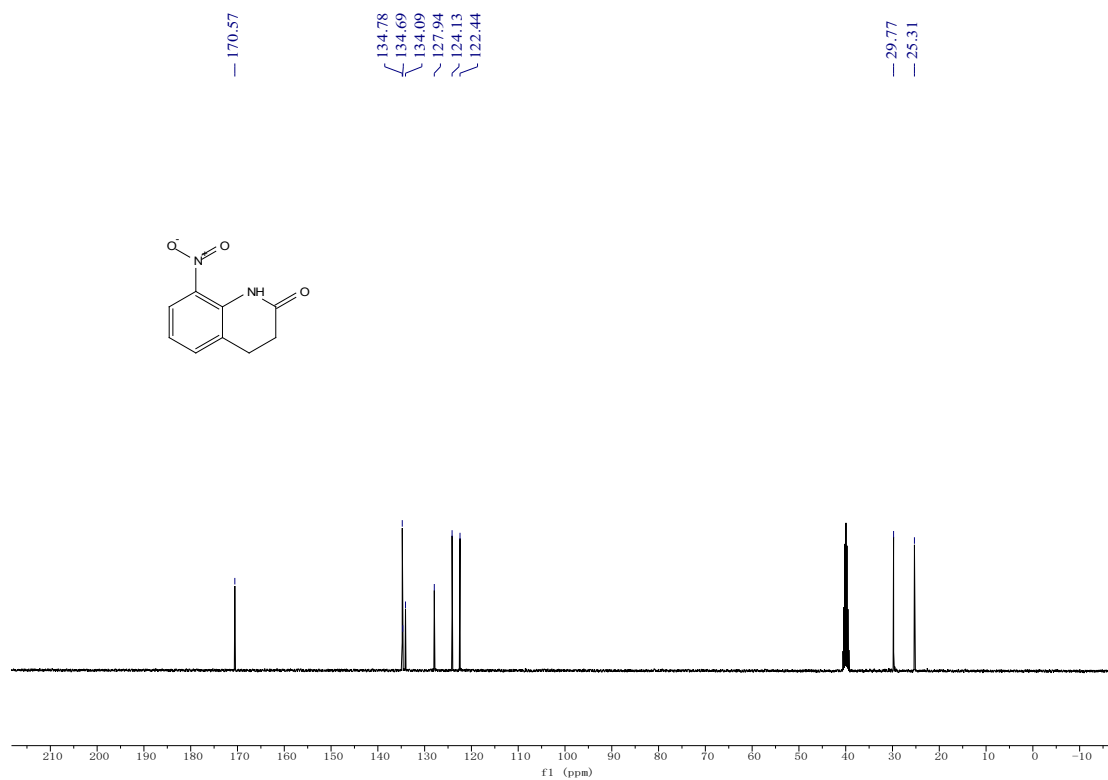

### <sup>1</sup>H NMR spectrum of 4-methyl-3,4-dihydroquinolin-2(1H)-one (2u)

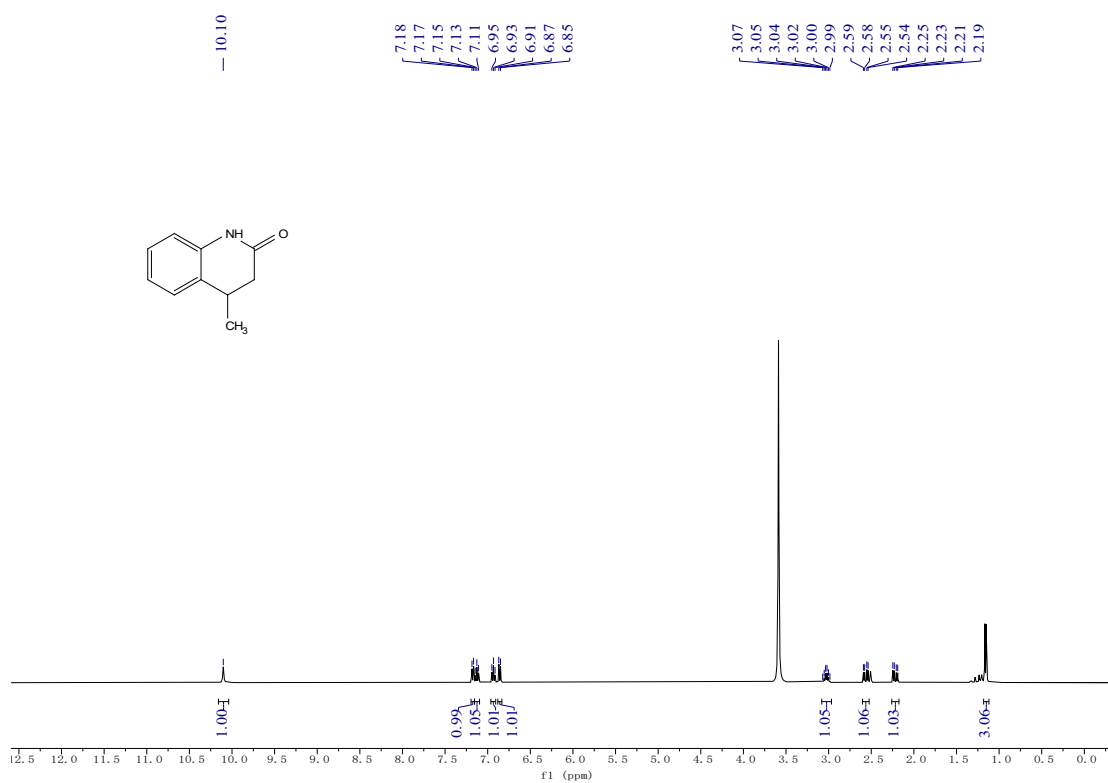

### <sup>13</sup>C NMR spectrum of 4-methyl-3,4-dihydroquinolin-2(1H)-one (2u)

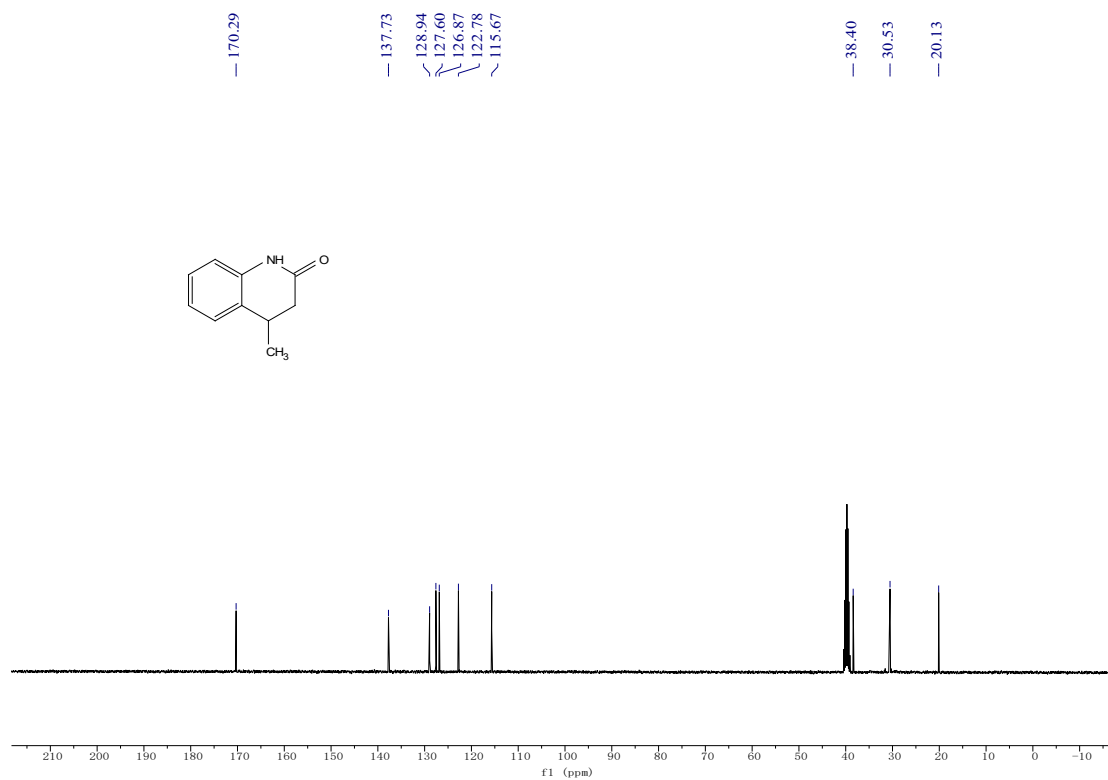

### <sup>1</sup>H NMR spectrum of 3-ethyl-3,4-dihydroquinolin-2(1H)-one (2v)

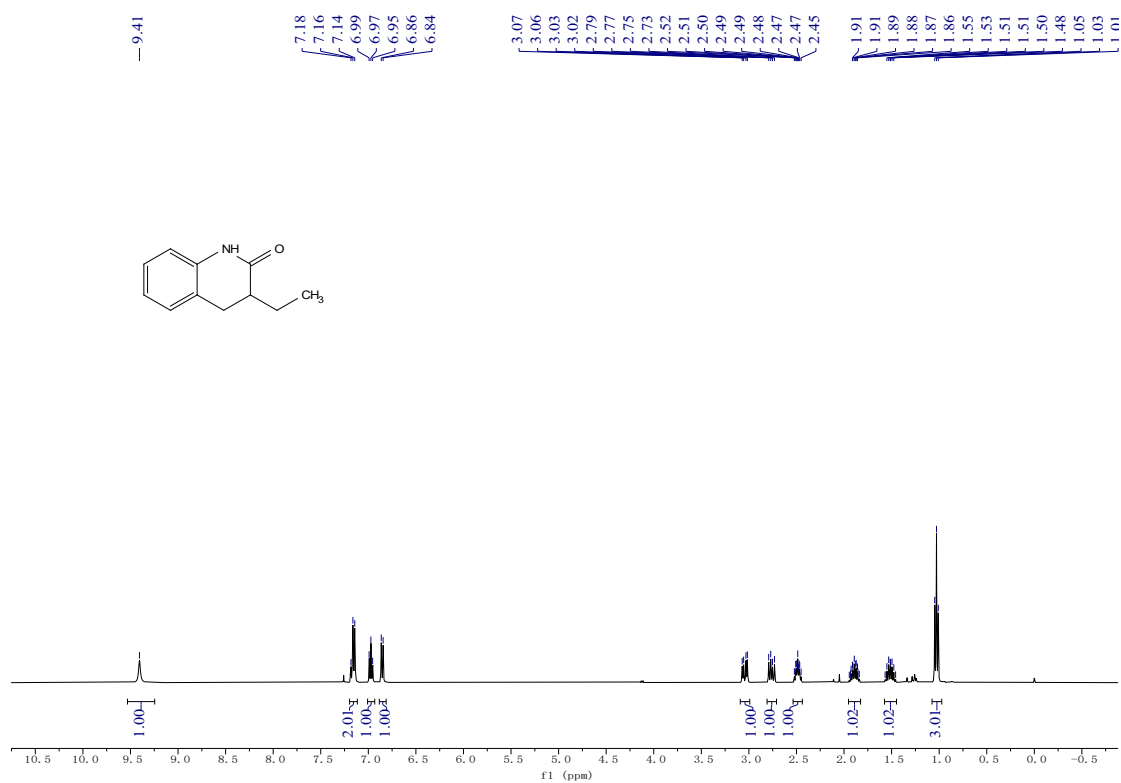

### <sup>13</sup>C NMR spectrum of 3-ethyl-3,4-dihydroquinolin-2(1H)-one (2v)

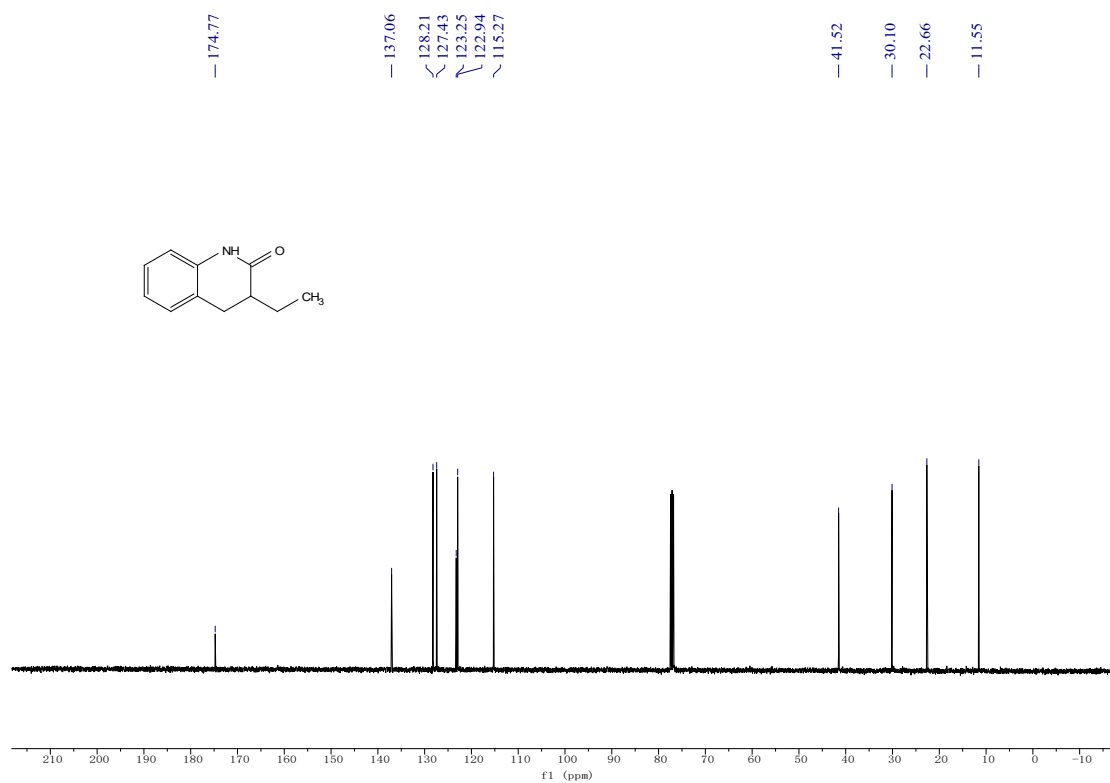

### <sup>1</sup>H NMR spectrum of 3-methyl-3,4-dihydroquinolin-2(1H)-one (2w)

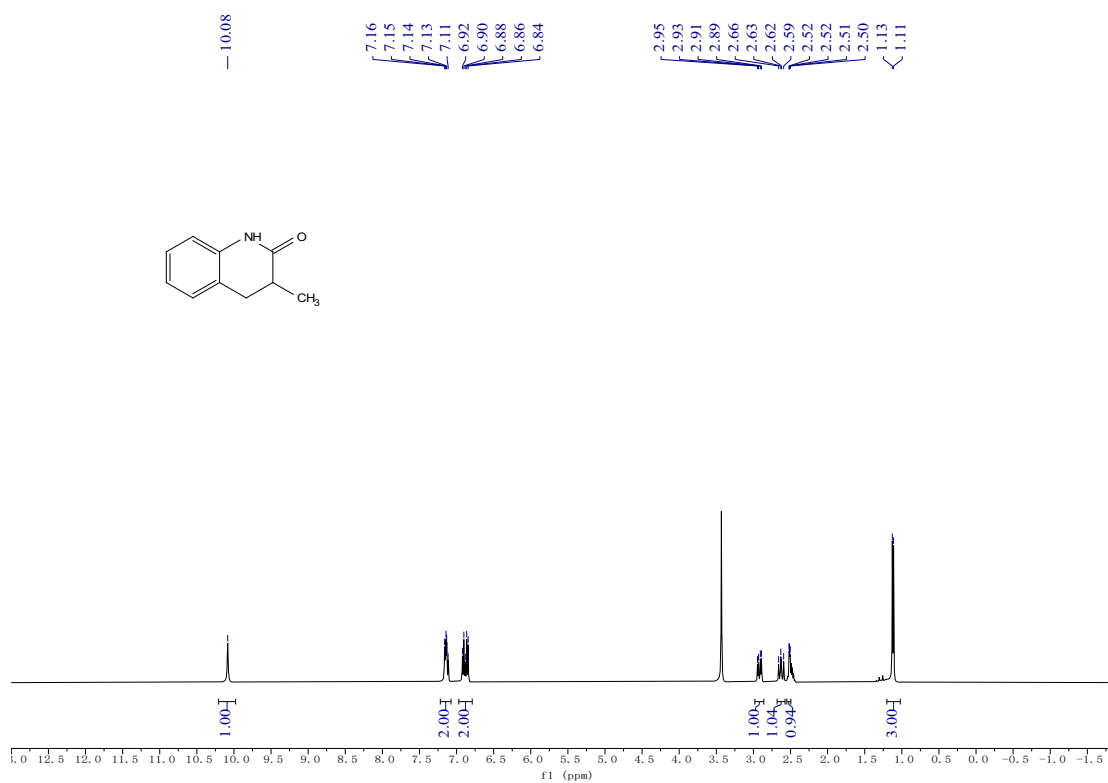

### <sup>13</sup>C NMR spectrum of 3-methyl-3,4-dihydroquinolin-2(1H)-one (2w)

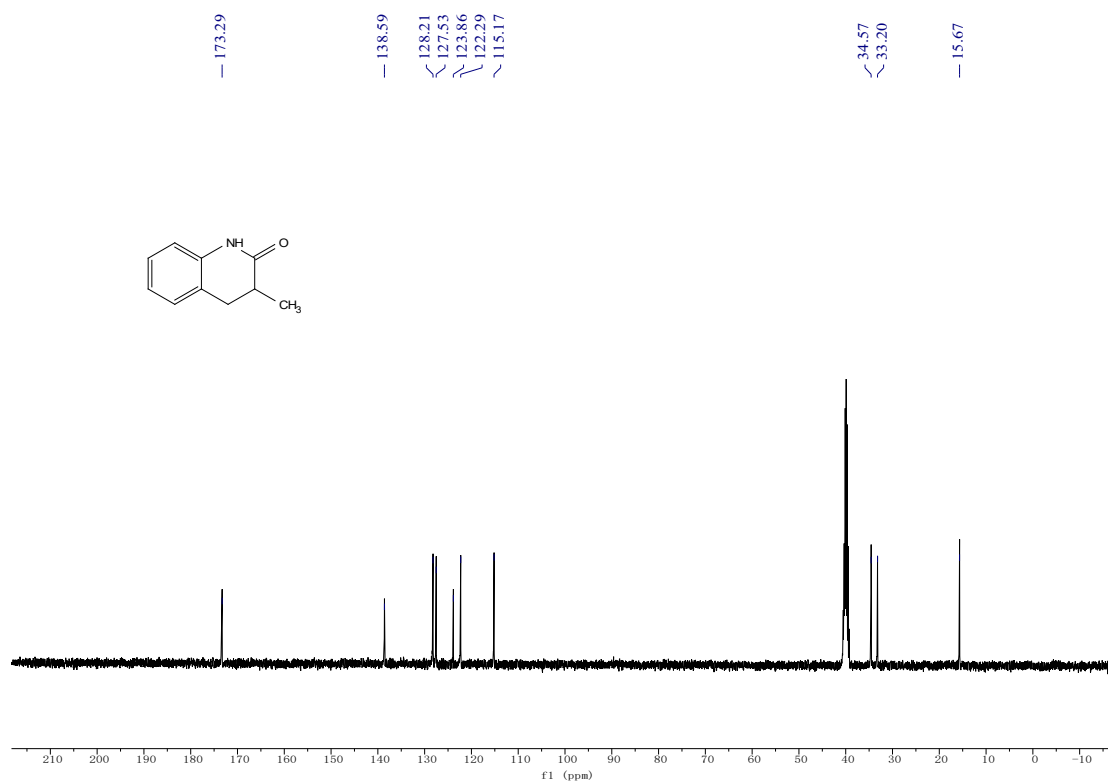

### <sup>1</sup>H NMR spectrum of 2-oxo-1,2,3,4-tetrahydroquinoline-3-carbonitrile (2x)

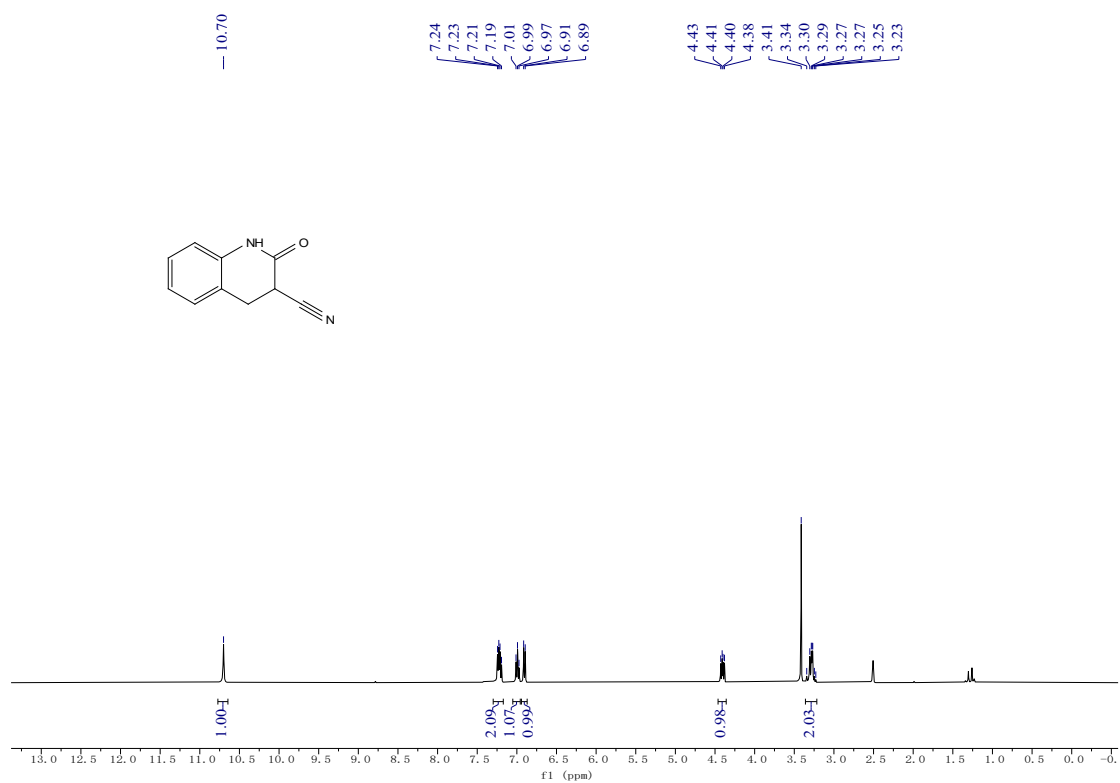

### <sup>13</sup>C NMR spectrum of 2-oxo-1,2,3,4-tetrahydroquinoline-3-carbonitrile (2x)

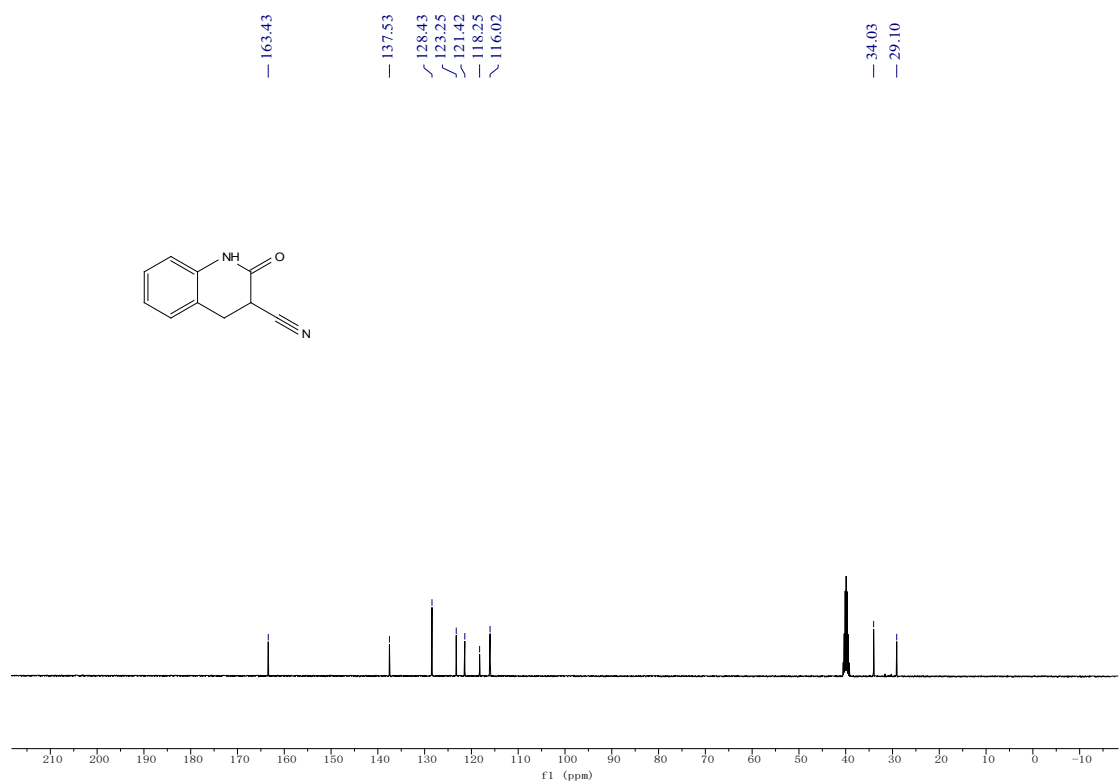

### <sup>1</sup>H NMR spectrum of 1,4-dihydroisoquinolin-3(2H)-one (2y)

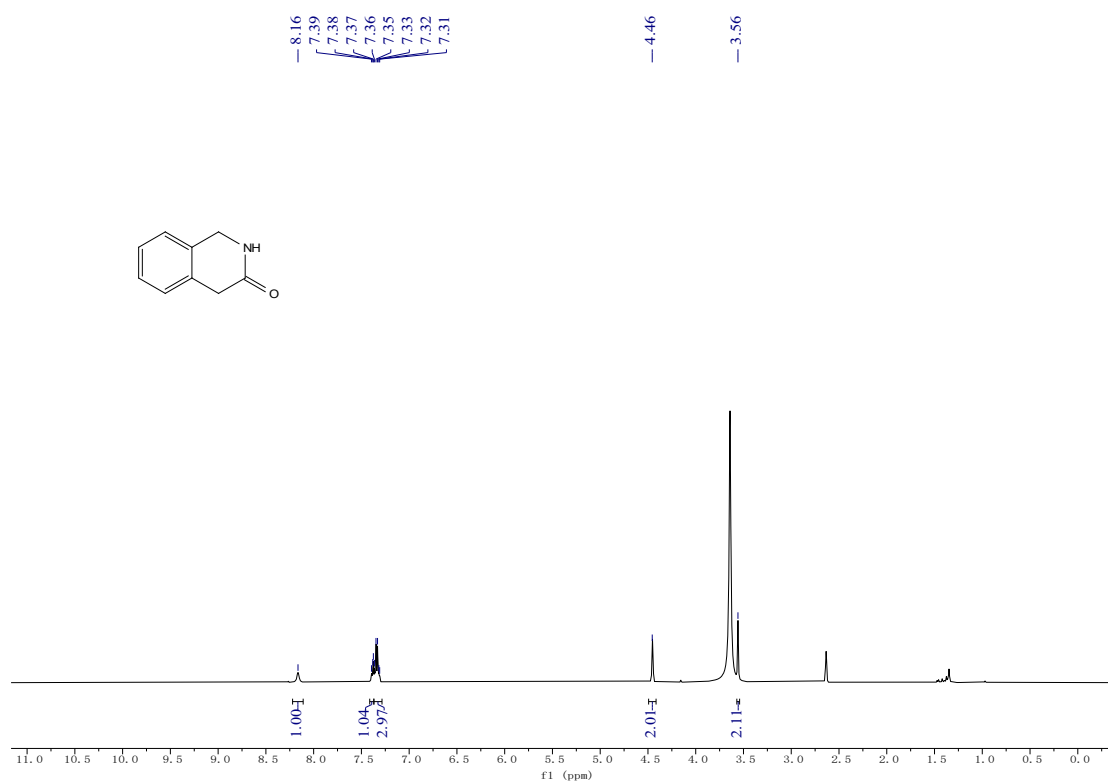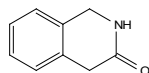

### <sup>13</sup>C NMR spectrum of 1,4-dihydroisoquinolin-3(2H)-one (2y)

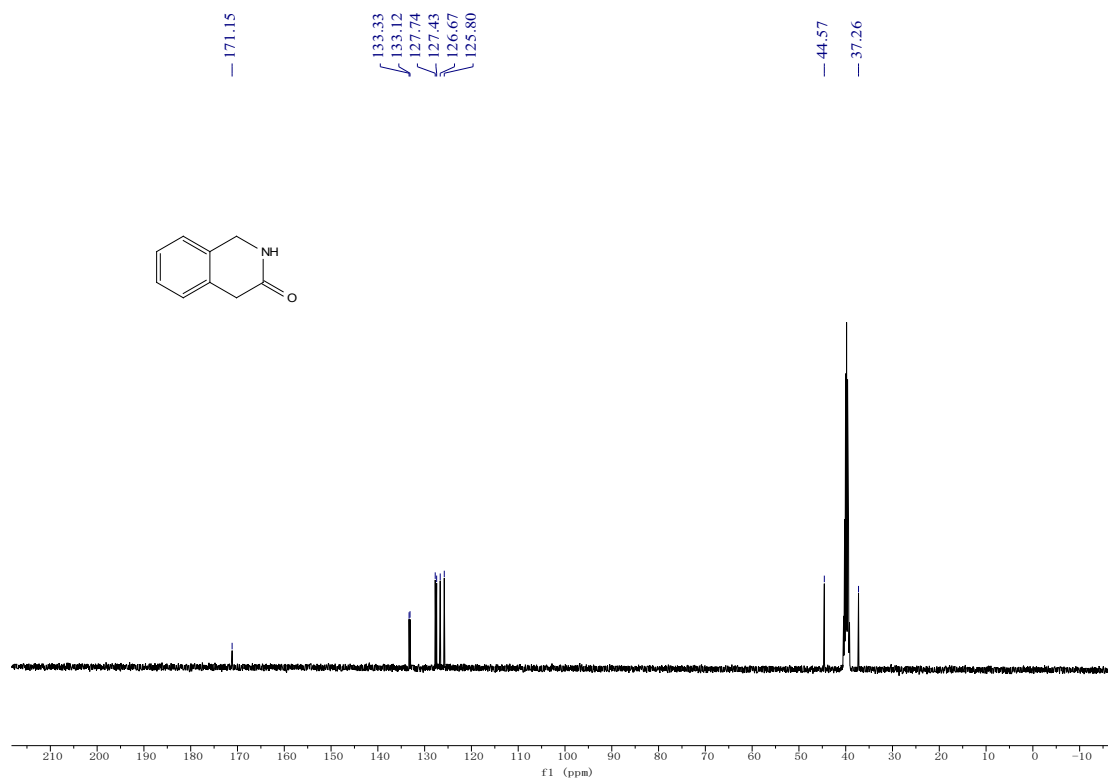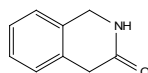

**<sup>1</sup>H NMR spectrum of 9-chloro-3,4-dihydro-1,10-phenanthrolin-2(1H)-one (2z)**

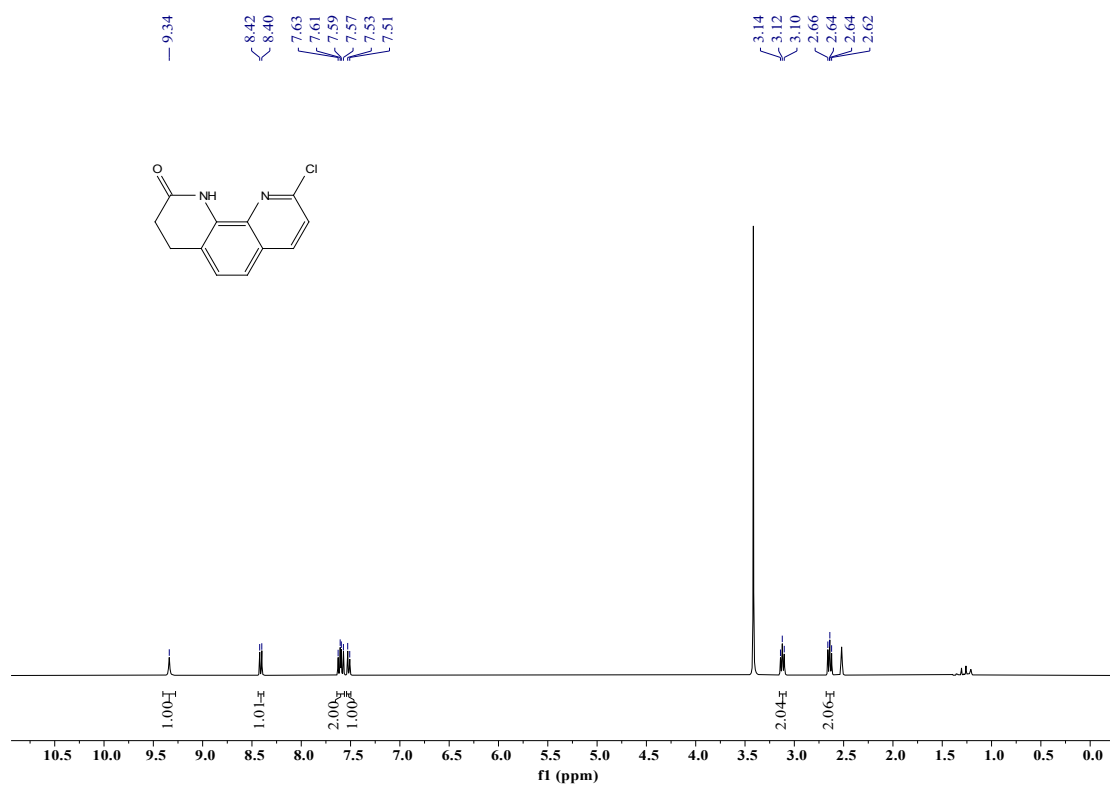

**<sup>13</sup>C NMR spectrum of 9-chloro-3,4-dihydro-1,10-phenanthrolin-2(1H)-one (2z)**

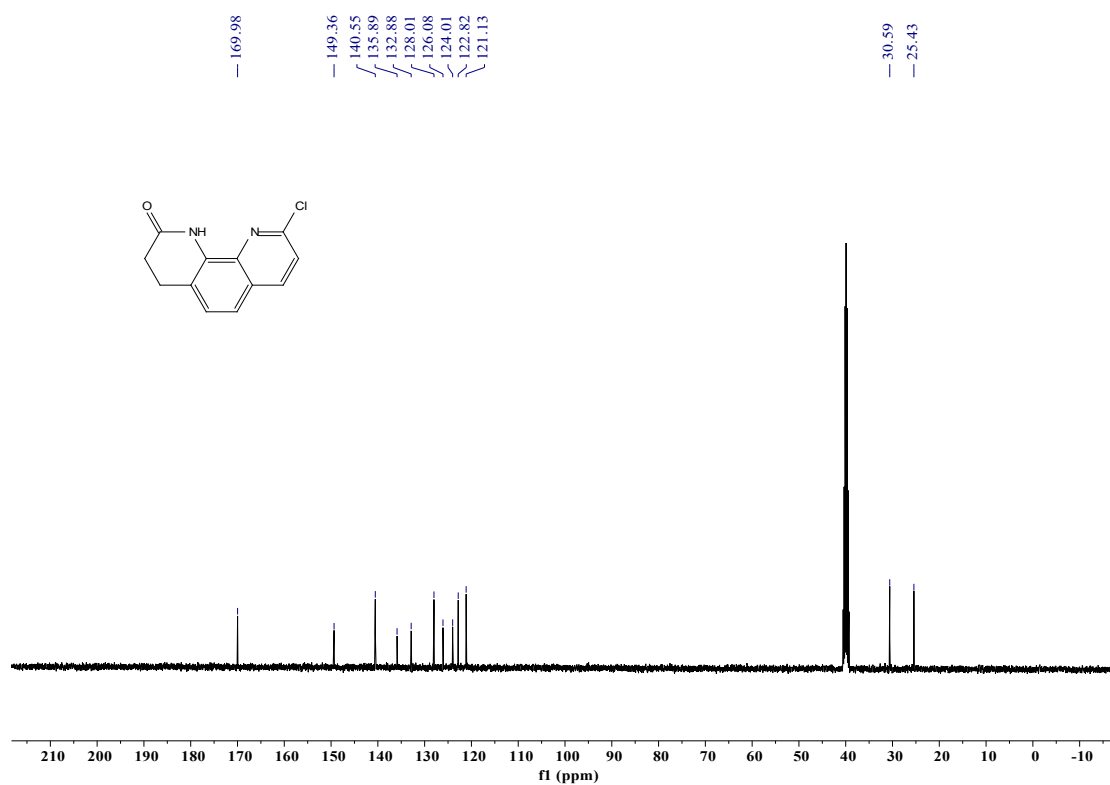



**<sup>1</sup>H NMR spectrum of 3,4-dihydroquinazolin-2(1H)-one (2ab)**

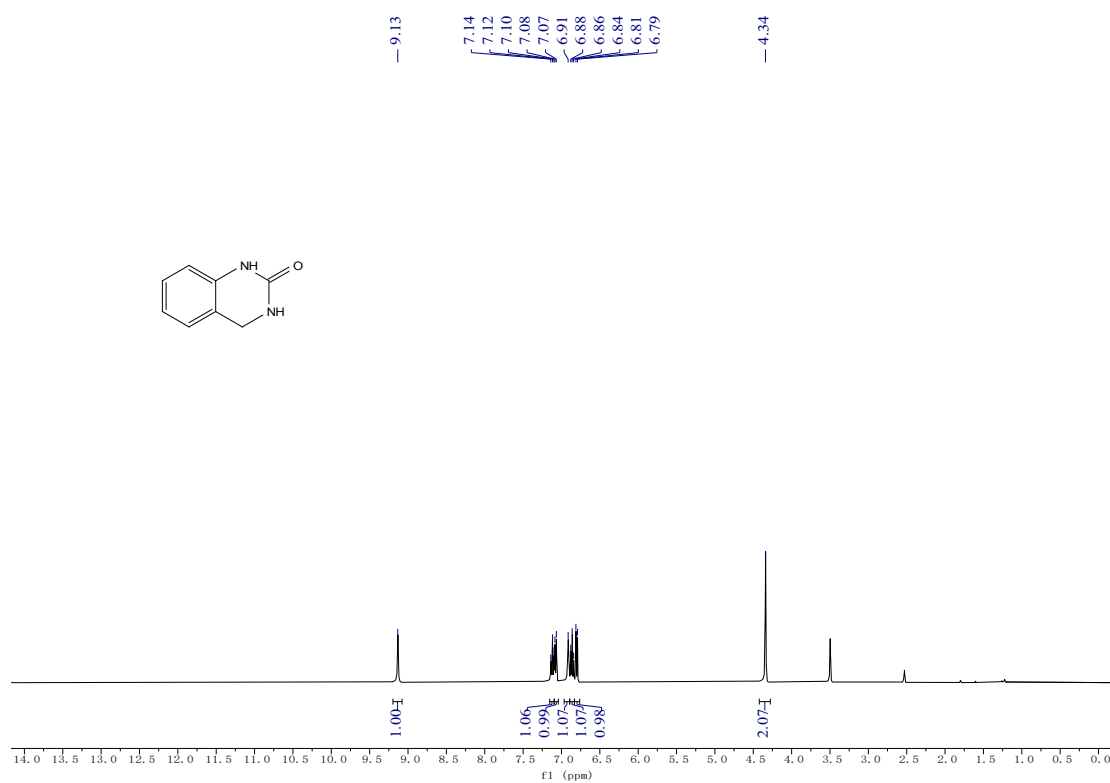

**<sup>13</sup>C NMR spectrum of 3,4-dihydroquinazolin-2(1H)-one (2ab)**

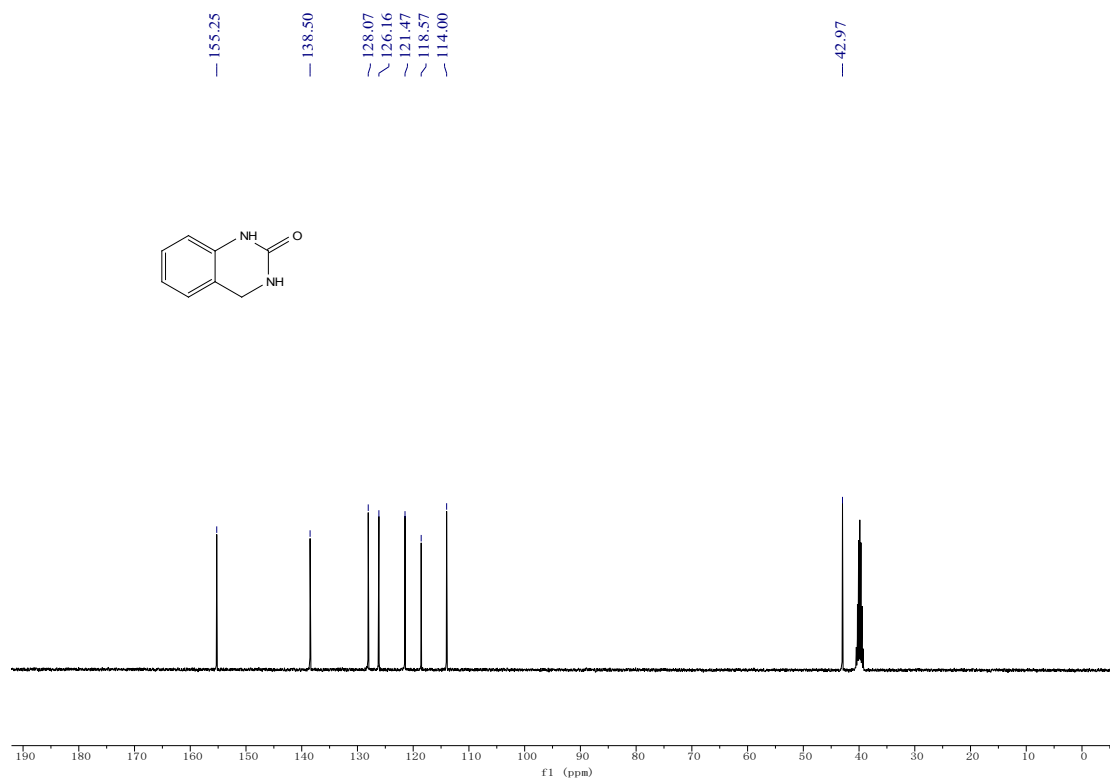

**<sup>1</sup>H NMR spectrum of 7-fluoro-3,4-dihydroquinazolin-2(1H)-one (2ac)**

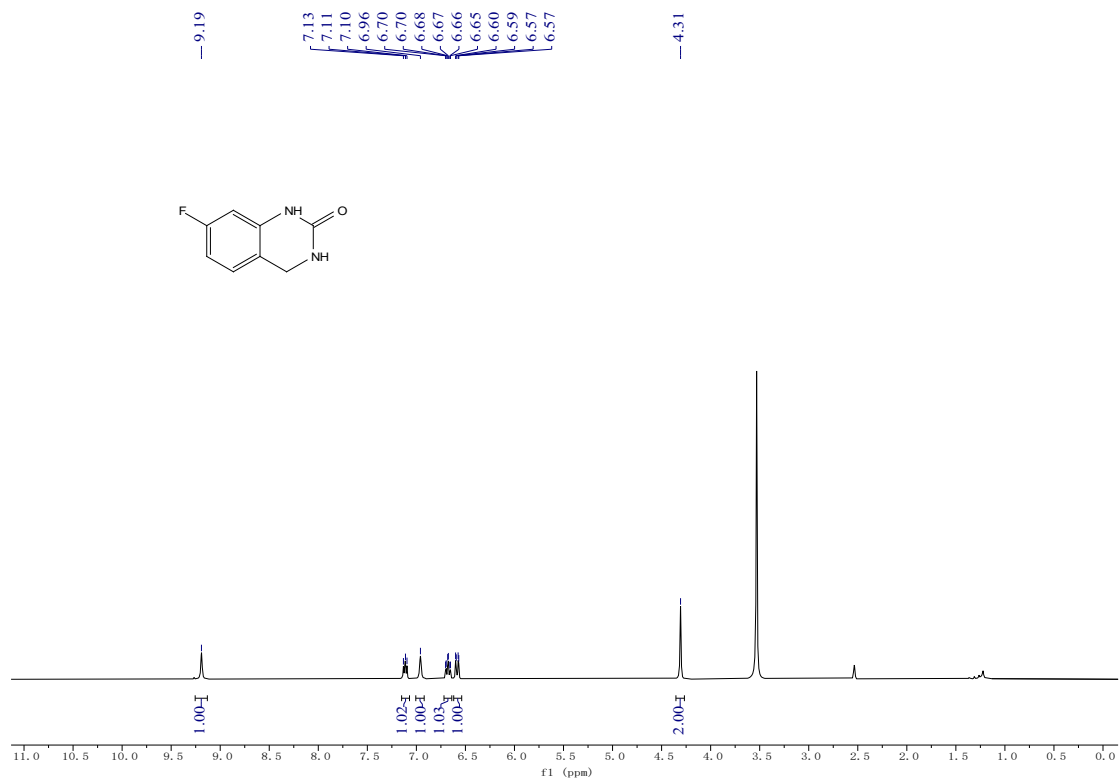

**<sup>13</sup>C NMR spectrum of 7-fluoro-3,4-dihydroquinazolin-2(1H)-one (2ac)**

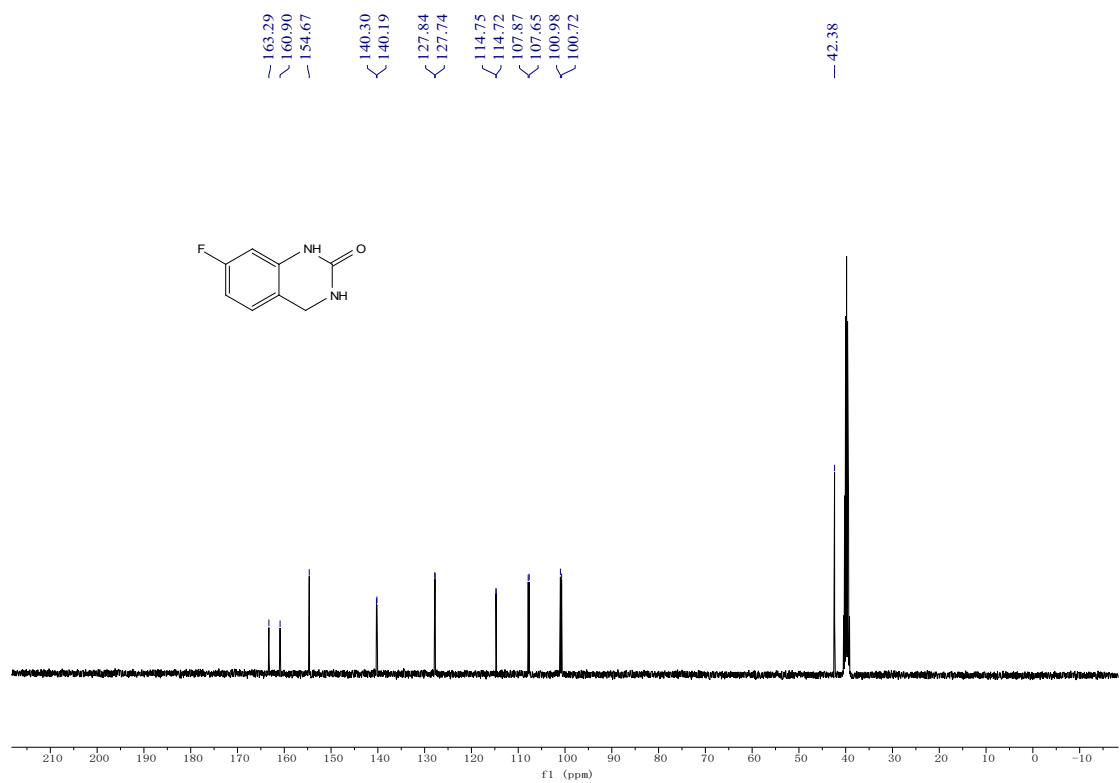

**<sup>19</sup>F NMR spectrum of 7-fluoro-3,4-dihydroquinazolin-2(1H)-one (2ac)**

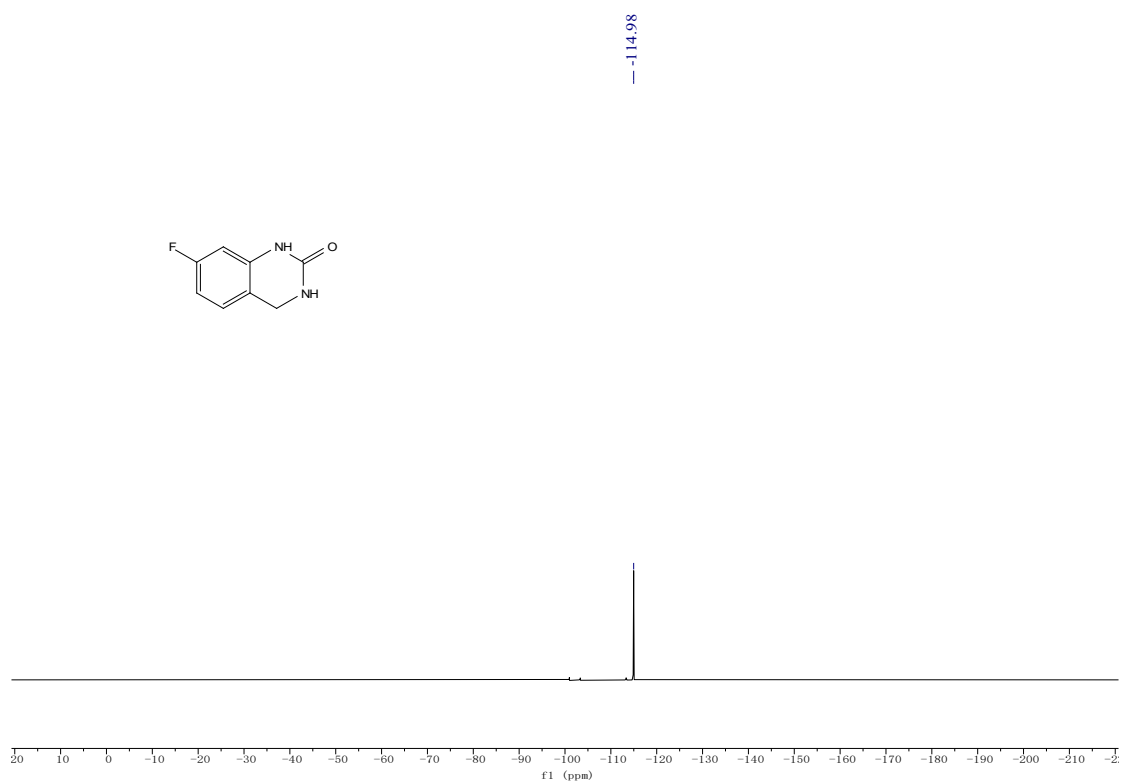

**<sup>1</sup>H NMR spectrum of 6-bromo-3,4-dihydroquinazolin-2(1H)-one (2ad)**

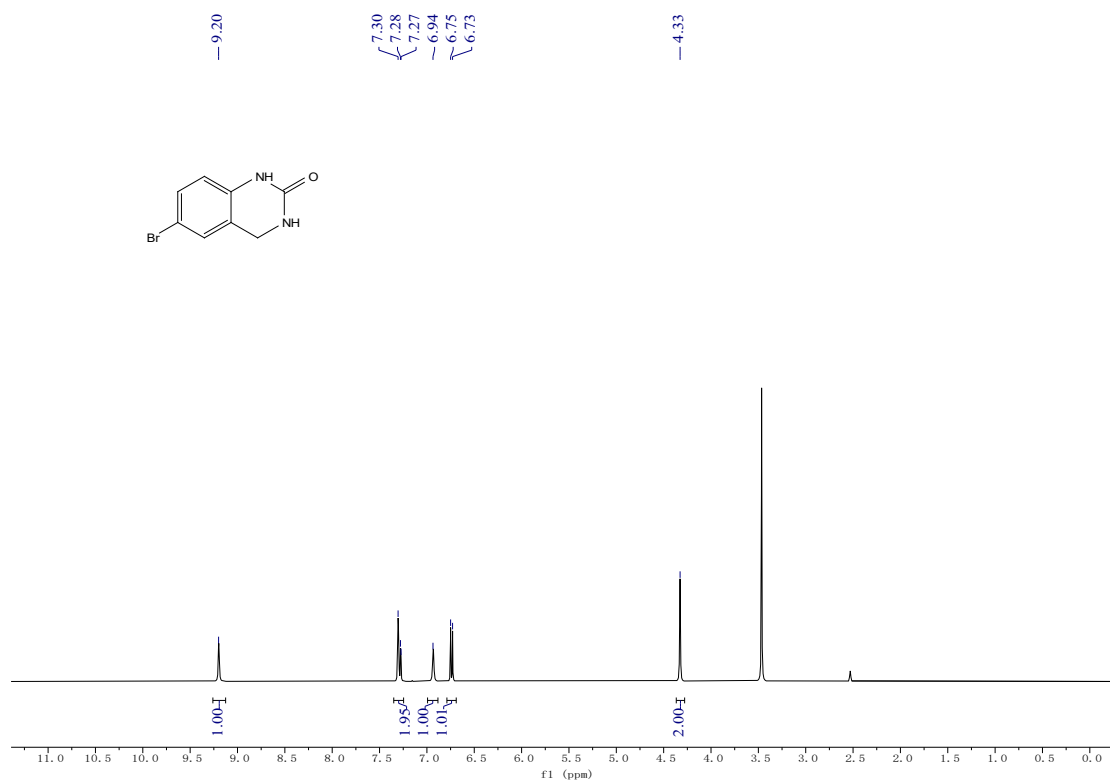

**<sup>13</sup>C NMR spectrum of 6-bromo-3,4-dihydroquinazolin-2(1H)-one (2ad)**

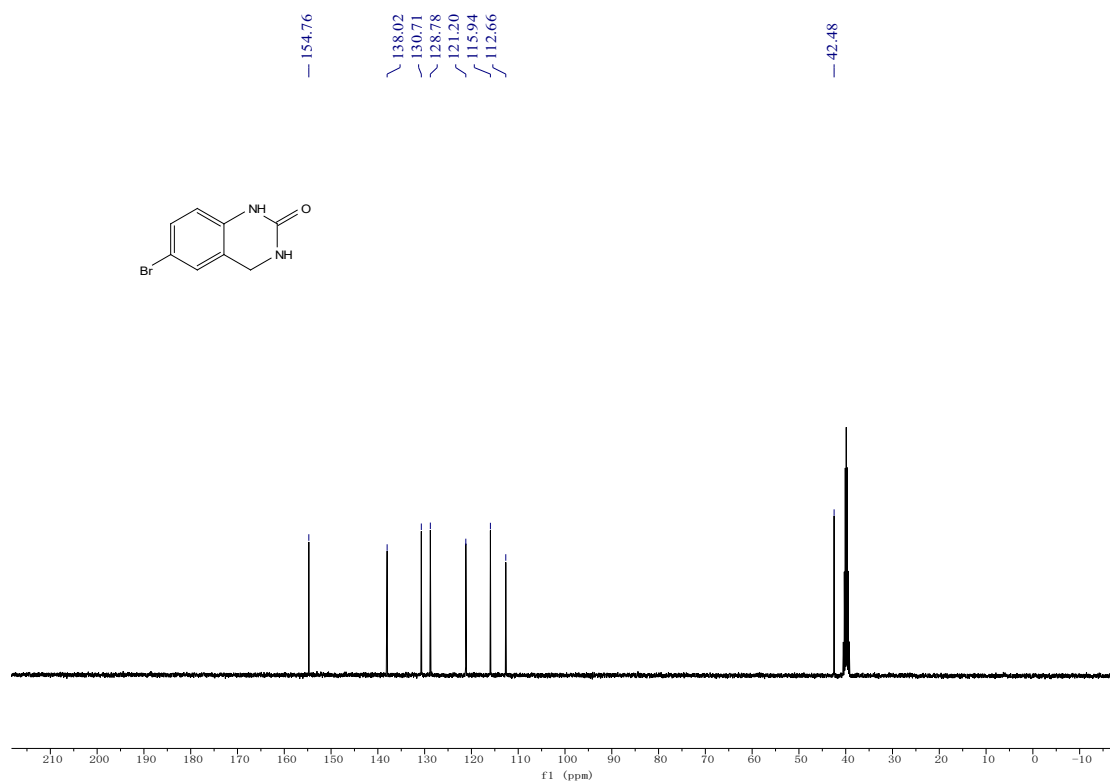

**<sup>1</sup>H NMR spectrum of 4-phenyl-3,4-dihydroquinazolin-2(1H)-one (2ae)**

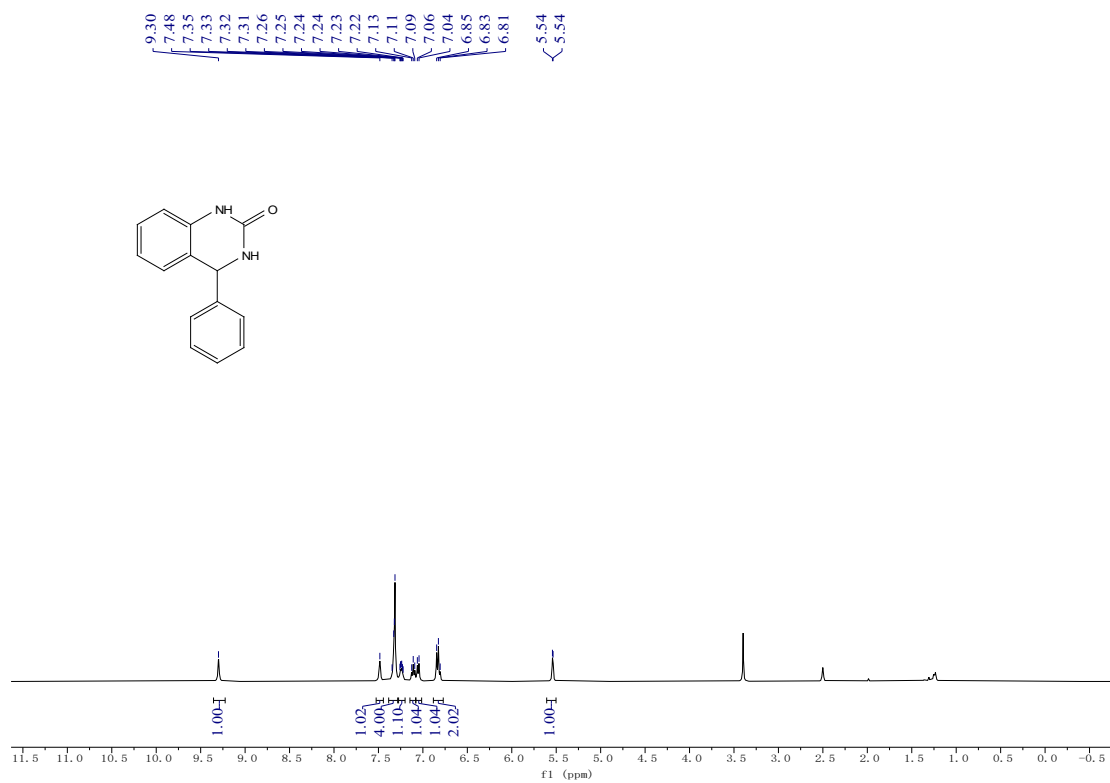

<sup>13</sup>C NMR spectrum of 4-phenyl-3,4-dihydroquinazolin-2(1H)-one (2ae)

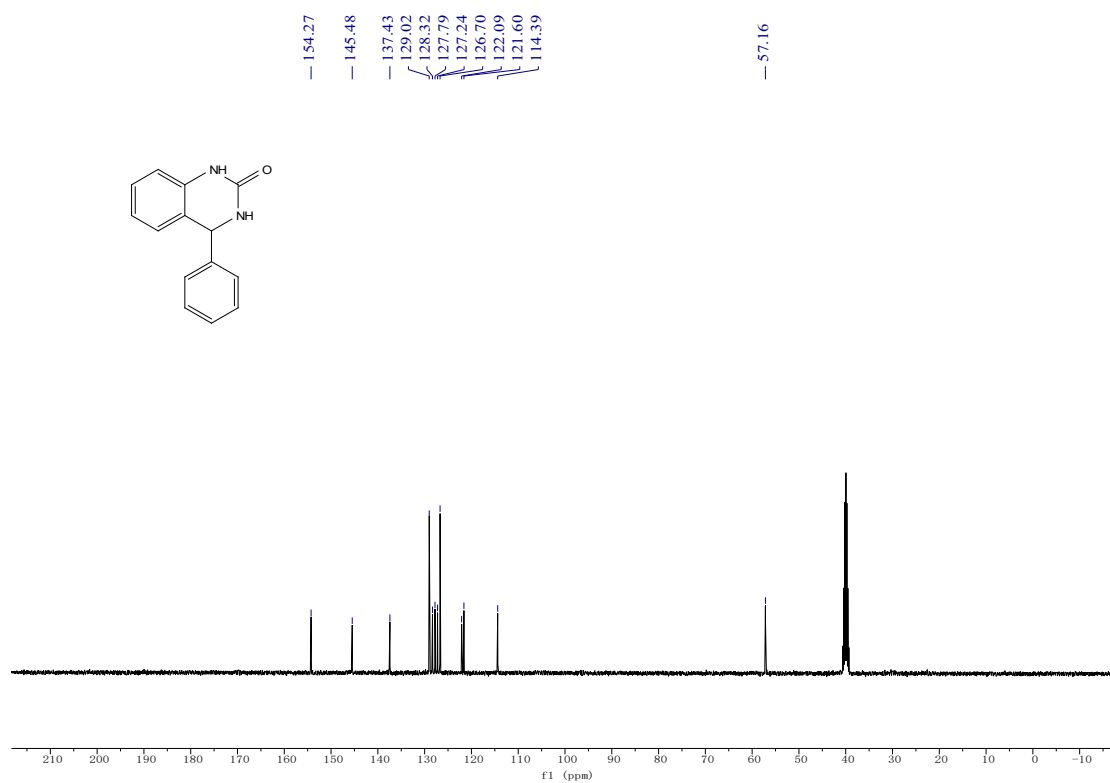

<sup>1</sup>H NMR spectrum of 3-oxo-3,4-dihydroquinoxaline-1(2H)-carbaldehyde (2af)

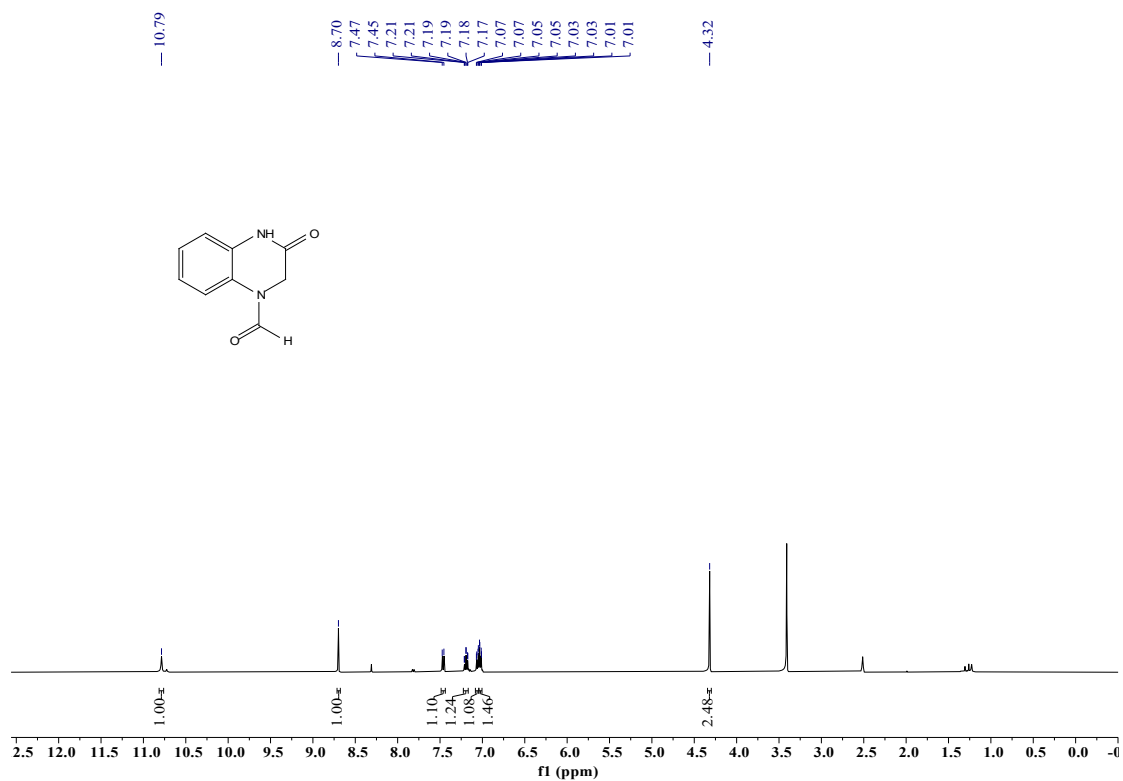

**<sup>13</sup>C NMR spectrum of 3-oxo-3,4-dihydroquinoxaline-1(2H)-carbaldehyde (2af)**

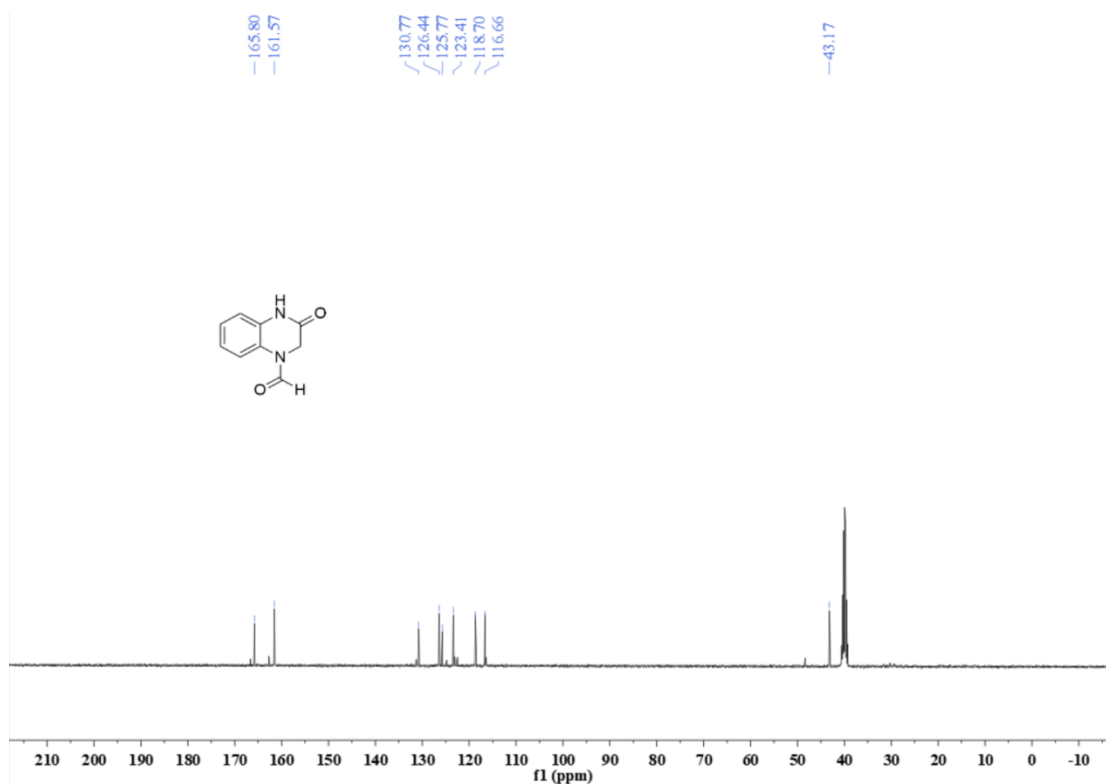

**<sup>1</sup>H NMR spectrum of 6-(pyridin-3-yl)-3,4-dihydroquinolin-2(1H)-one (3p)**

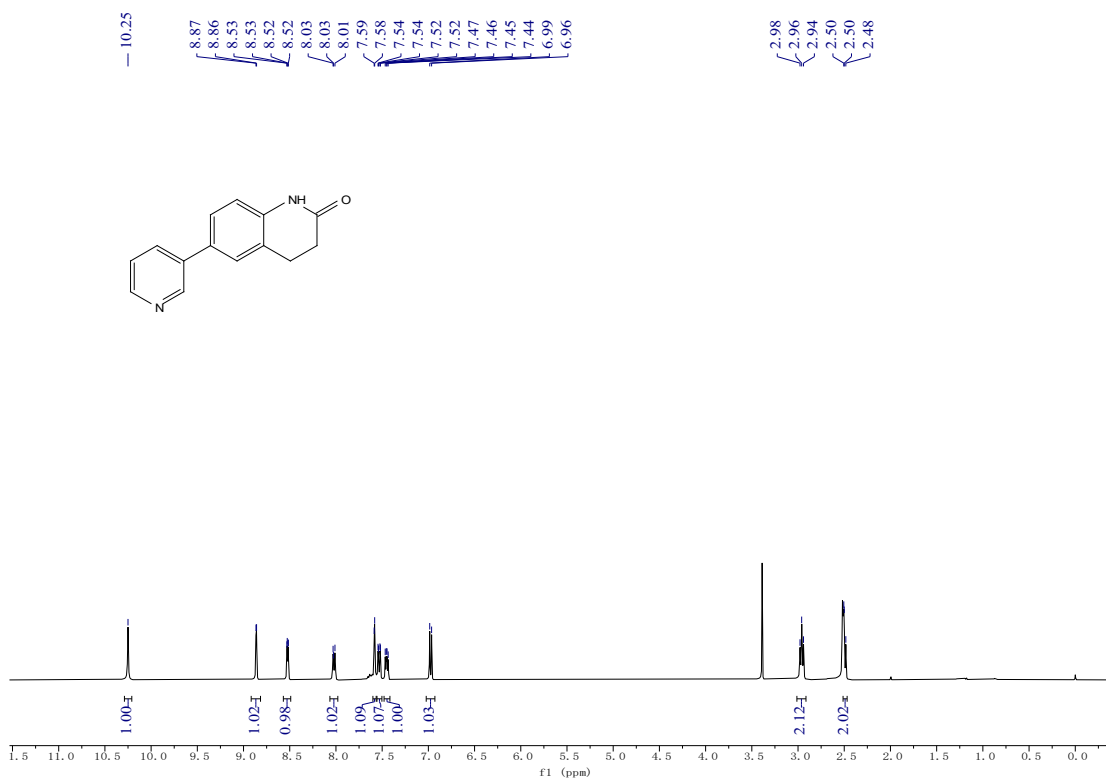

**<sup>13</sup>C NMR spectrum of 6-(pyridin-3-yl)-3,4-dihydroquinolin-2(1H)-one (3p)**

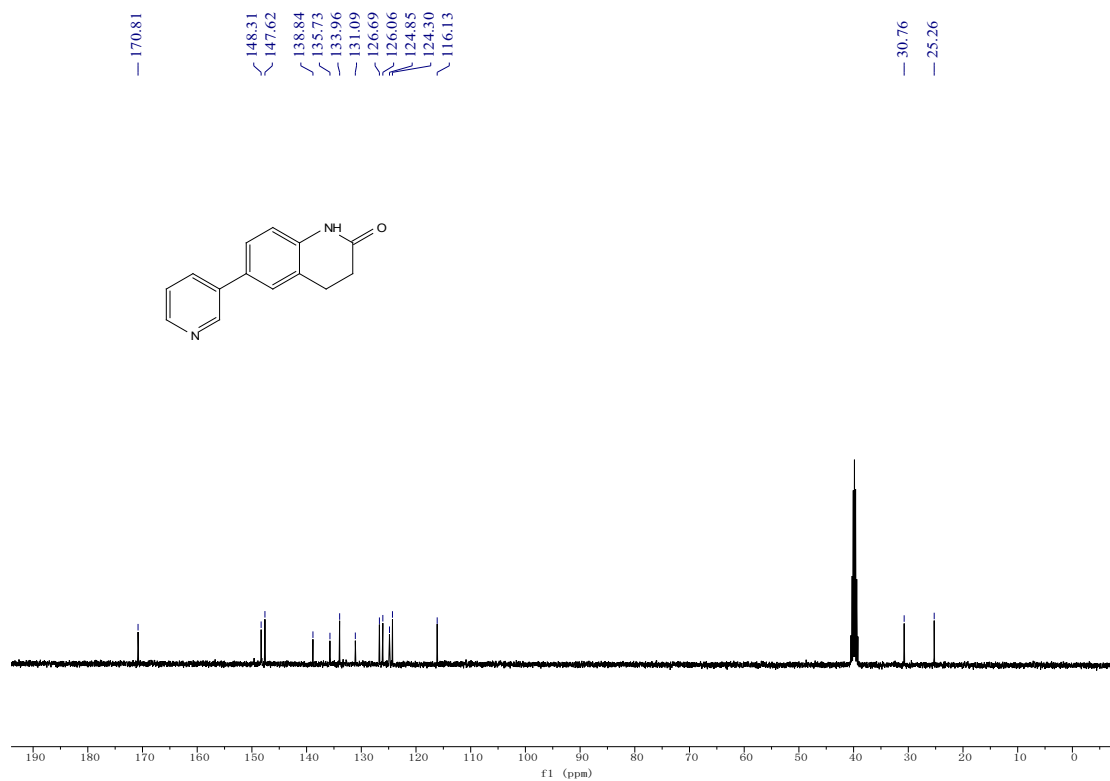

Supplement: d4nj03878a1.pdf [file d4nj03878a1.pdf]
